# Supplementary material for: Omics Analysis Unveils the Pathway Involved in the Anthocyanin Biosynthesis in Tomato Seedling and Fruits
Source: MDPI journal article supplement (doi:10.3390/ijms24108690), 2023-05-12
Supplement: s1 [file s1]

## Supplementary Material

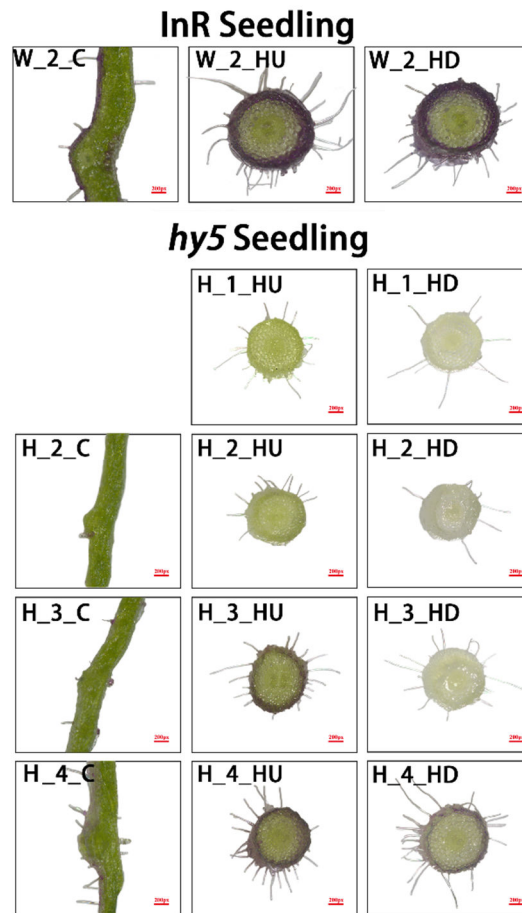

**Figure S1.** Cross sections of cotyledons and hypocotyls of InR and *Slhy5* seedlings.

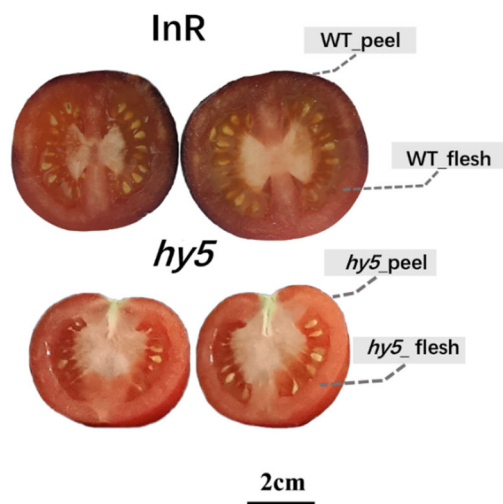

**Figure S2.** Phenotype of the fruit from the tomato cultivar 'Indigo Rose'(InR) and *Slhy5* mutants at the fully mature stage.

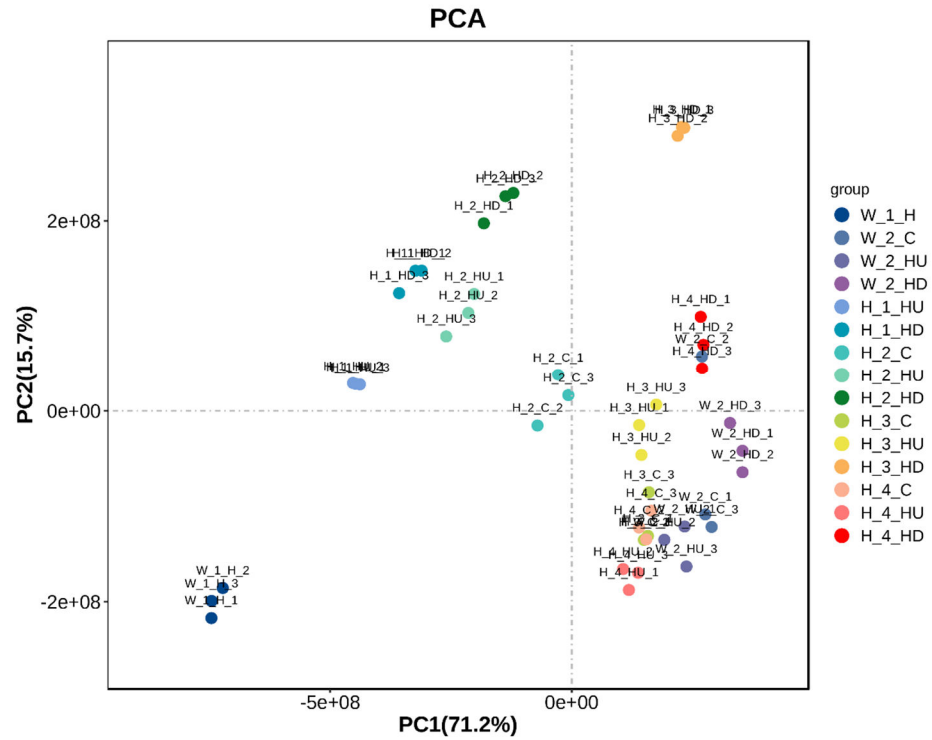

**Figure S3.** Principal component analysis result of all samples analyzed for metabolite contents.

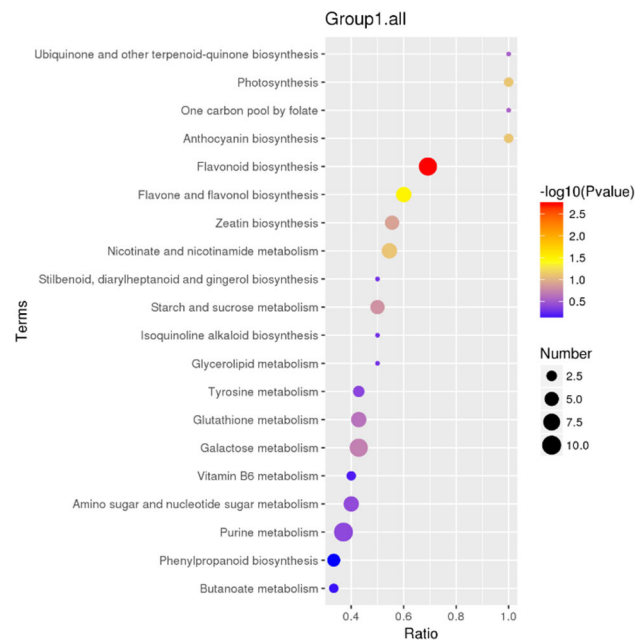

**Figure S4.** Bubble diagram of the enriched KEGG pathways among the differentially abundant metabolites of Group 1 in the cotyledon of InR seedlings and *Slhy5* seedlings.

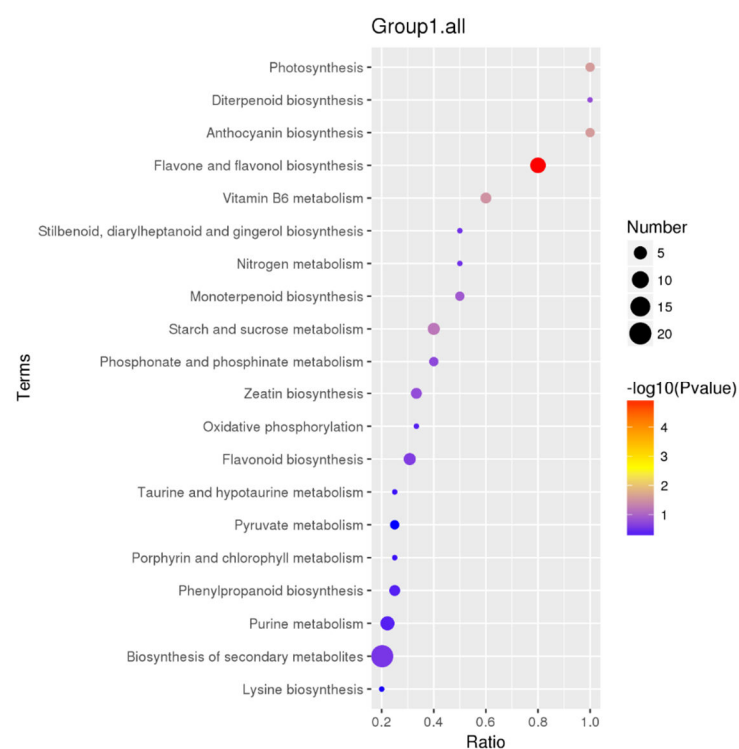

**Figure S5.** Bubble diagram of the enriched KEGG pathways among the differentially abundant metabolites of Group 1 in the upper part of InR seedlings and *Slhy5* seedlings.

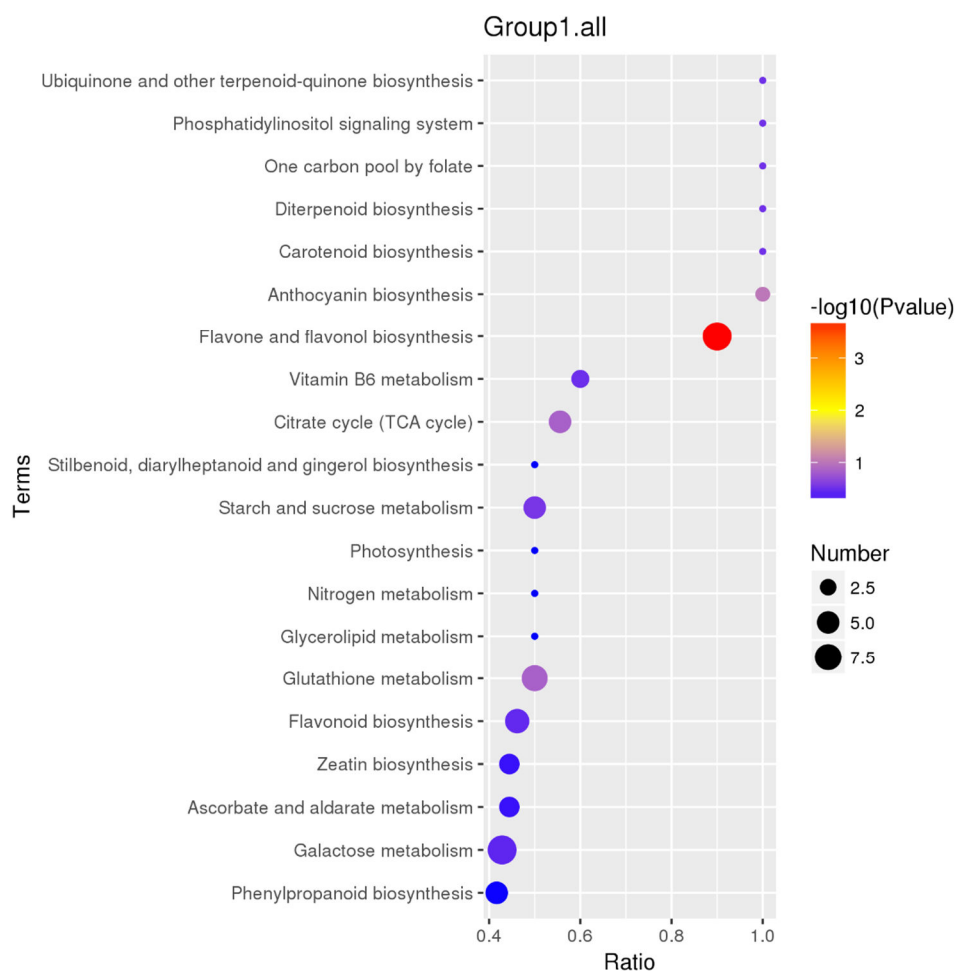

**Figure S6.** Bubble diagram of the enriched KEGG pathways among the differentially abundant metabolites of Group 1 in the lower part of InR seedlings and *Slhy5* seedlings.

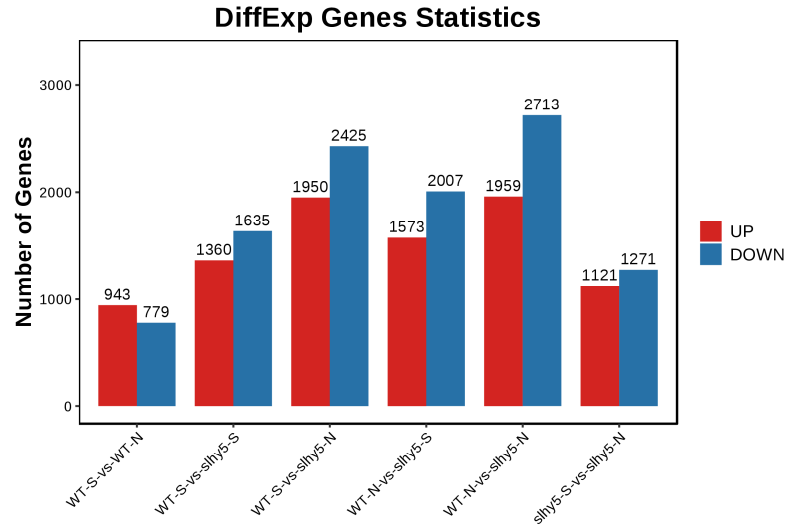

Figure S7. Bar graph of differentially expressed genes (DEGs) in InR and *Slhy5* fruit peel.

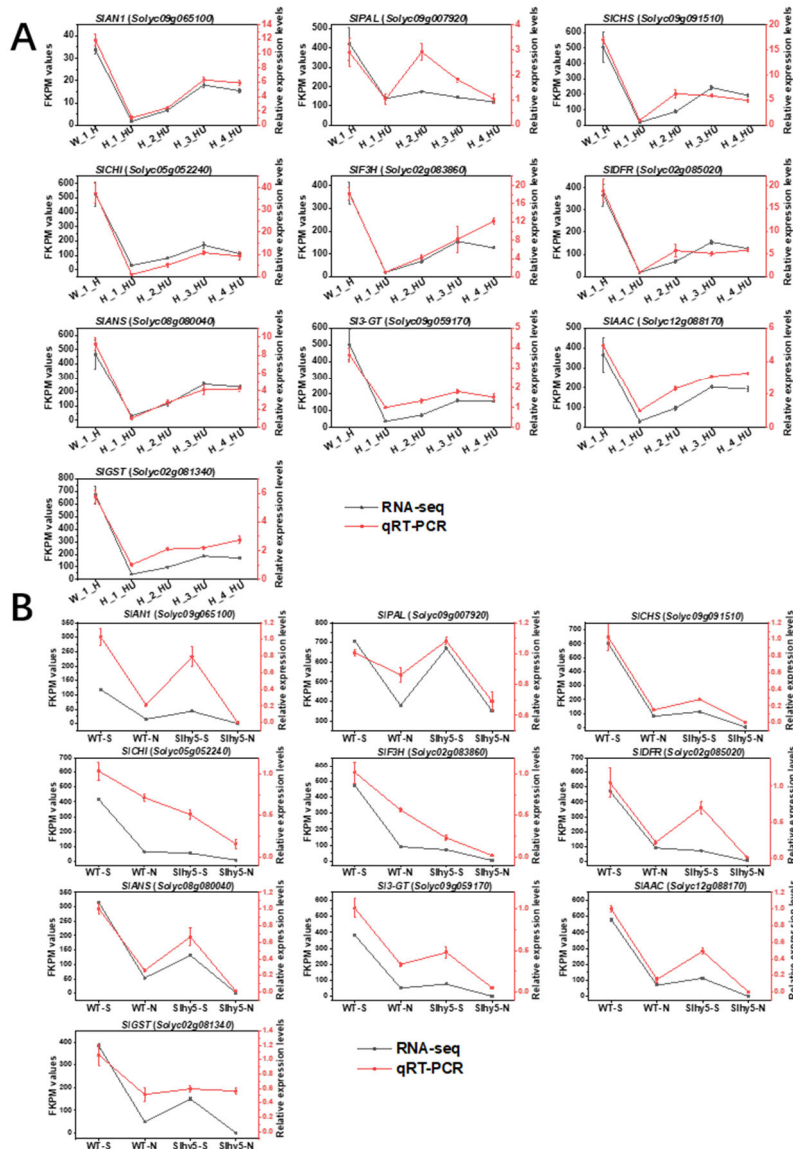

Figure S8. Expression pattern validation of genes involved in anthocyanin biosynthetic in tomato seedling (A) and fruit peel (B) using RT-qPCR verified the RNA-Seq results.
