# Supplementary material for: Omics Analysis Unveils the Pathway Involved in the Anthocyanin Biosynthesis in Tomato Seedling and Fruits
Source: Int J Mol Sci. 2023 May 12;24(10):8690. doi: 10.3390/ijms24108690 (PMC10218277; doi:10.3390/ijms24108690)
Supplement: Supplementary file 1 [file ijms-24-08690-s001.zip › Supplementary Tables.xlsx]

## Sheet: Table S1
Table S1 Primers and probes used in this study.
Primers for Y2H
Primer	Sequence 5'-3'
AD-SlHY5(F)	GGAGGCCAGTgaattcATGCAAGAGCAAGCGACGA
AD-SlHY5(R)	CGAGCTCGATggatccCTACTTCCTCCCTTCCTGTGCA
AD-SlAN1(F)	gccatggaggccagtgaattcATGGAGATTATACAGCCTAATAGCCTG
AD-SlAN1(R)	cagctcgagctcgatggatccTTAATTAACTCTAGGGATTATCTGATTTATTG
AD-SlAN2-like(F)	gccatggaggccagtgaattcATGAATATTGCCAAGACATTGGG
AD-SlAN2-like(R)	cagctcgagctcgatggatccCTAATTAAATAGATTCCATAGGTCAATATCA
AD-SlAN11(F)	gccatggaggccagtgaattcATGGAGAATTCAAGTCAAGAATCGC
AD-SlAN11(R)	cagctcgagctcgatggatccTTATACTTTAAGCAGCTGCAACTTGTT
AD-SlAN2(F)	gccatggaggccagtgaattcATGAATACTCCTATGTGTGCATCGTT
AD-SlAN2(R)	cagctcgagctcgatggatccTTAATTAAGTAGATTCCATAAGTCAATATCAGT
AD-SlJAF13(F)	gccatggaggccagtgaattcATGGCTATGGGACACCAAGATC
AD-SlJAF13(R)	cagctcgagctcgatggatccTCAAGATTTCCATACTACTCTCTGAAGTG
AD-SlPIF1(F)	GGAGGCCAGTgaattcATGAATTACTGTGTTGTTCCTGATTTC
AD-SlPIF1®	CGAGCTCGATggatccCTAAATAGTATGCTCACCAGATTGATGA
AD-SlPIF3(F)	GGAGGCCAGTgaattcATGCCTCTCTCTGAGTTTTTGAAGA
AD-SlPIF3®	CGAGCTCGATggatccCTACAAACTGGGACCAGCTTCAT
AD-SlPIF4(F)	GGAGGCCAGTgaattcATGCTGCAAGATATTAAAGAGGGG
AD-SlPIF4®	CGAGCTCGATggatccTCAAGTGGCAGGTGCATTACTATT
AD-SlWRKY(F)	GGAGGCCAGTgaattcATGGCGATTACTGCCATAAGACC
AD-SlWRKY®	CGAGCTCGATggatccCTATGATTTCTCTTTCATAGCTGAAGATT
AD-SlBBX24(F)	GGAGGCCAGTgaattcATGAAGATACAGTGTGATGTGTGTGAG
AD-SlBBX24®	CGAGCTCGATggatccTCAACCAAGATCGGGGACAG
BD-SlHY5(F)	atggccatggaggccgaattcATGCAAGAGCAAGCGACGA
BD-SlHY5(R)	ccgctgcaggtcgacggatccCTACTTCCTCCCTTCCTGTGCA
BD-SlWRKY44(F)	atggccatggaggccgaattcATGGCGATTACTGCCATAAGACC
BD-SlWRKY44(R)	ccgctgcaggtcgacggatccCTATGATTTCTCTTTCATAGCTGAAGATT
BD-SlBBX24(F)	atggccatggaggccgaattcATGAAGATACAGTGTGATGTGTGTGAG
BD-SlBBX24(R)	ccgctgcaggtcgacggatccTCAACCAAGATCGGGGACAG
BD-SlPIF4(F)	atggccatggaggccgaattcATGCTGCAAGATATTAAAGAGGGG
BD-SlPIF4(R)	ccgctgcaggtcgacggatccTCAAGTGGCAGGTGCATTACTATT
BD-SlPIF3(F)	atggccatggaggccgaattcATGCCTCTCTCTGAGTTTTTGAAGA
BD-SlPIF3(R)	ccgctgcaggtcgacggatccCTACAAACTGGGACCAGCTTCAT
BD-SlPIF1(F)	atggccatggaggccgaattcATGAATTACTGTGTTGTTCCTGATTTC
BD-SlPIF1(R)	ccgctgcaggtcgacggatccCTAAATAGTATGCTCACCAGATTGATGA
BD-AN1(F)	atggccatggaggccgaattcATGGAGATTATACAGCCTAATAGCCTG
BD-AN1(R)	ccgctgcaggtcgacggatccTTAATTAACTCTAGGGATTATCTGATTTATTG
BD-AN2-like(F)	atggccatggaggccgaattcATGAATATTGCCAAGACATTGGG
BD-AN2-like(R)	ccgctgcaggtcgacggatccCTAATTAAATAGATTCCATAGGTCAATATCA
BD-AN11(F)	atggccatggaggccgaattcATGGAGAATTCAAGTCAAGAATCGC
BD-AN11(R)	ccgctgcaggtcgacggatccTTATACTTTAAGCAGCTGCAACTTGTT
BD-AN2(F)	atggccatggaggccgaattcATGAATACTCCTATGTGTGCATCGTT
BD-AN2(R)	ccgctgcaggtcgacggatccTTAATTAAGTAGATTCCATAAGTCAATATCAGT
BD-JAF13(F)	atggccatggaggccgaattcATGGCTATGGGACACCAAGATC
BD-JAF13(R)	ccgctgcaggtcgacggatccTCAAGATTTCCATACTACTCTCTGAAGTG
Primers for LCI
LCI-N-BBX24-F	acgggggacgagctcggtaccATGAAGATACAGTGTGATGTG
LCI-N-BBX24-R	cgcgtacgagatctggtcgacACCAAGATCGGGGACAGTAAA
LCI-C-HY5-F	tacgcgtcccggggcggtaccATGCAAGAGCAAGCGACGAGT
LCI-C-HY5-R	acgaaagctctgcaggtcgacCTACTTCCTCCCTTCCTGTG
LCI-C-PIF1-F	tacgcgtcccggggcggtaccATGAATTACTGTGTTGTTCCT
LCI-C-PIF1-R	acgaaagctctgcaggtcgacCTAAATAGTATGCTCACCAGA
LCI-C-PIF3-F	tacgcgtcccggggcggtaccATGCCTCTCTCTGAGTTTTTG
LCI-C-PIF3-R	acgaaagctctgcaggtcgacCTACAAACTGGGACCAGCTTC
LCI-C-AN2-F	tacgcgtcccggggcggtaccATGAATACTCCTATGTGTGCA
LCI-C-AN2-R	acgaaagctctgcaggtcgacTTAATTAAGTAGATTCCATAA
LCI-C-AN2-like-F	tacgcgtcccggggcggtaccATGAATATTGCCAAGACATTG
LCI-C-AN2-like-R	acgaaagctctgcaggtcgacCTAATTAAATAGATTCCATAG
LCI-C-AN11-F	tacgcgtcccggggcggtaccATGGAGAATTCAAGTCAAGA
LCI-C-AN11-R	acgaaagctctgcaggtcgacTTATACTTTAAGCAGCTGCA
Primers for RT-qPCR
SlACTIN-qRT-F	GGGATGGAGAAGTTTGGTGGTGG
SlACTIN-qRT-R	GGGATGGAGAAGTTTGGTGGTGG
SlAN1-qRT-F	CTAAGAGTGCCCGCATACAGAC
SlAN1-qRT-R	CTAAGAGTGCCCGCATACAGAC
SlPAL-qRT-F	GGAATTGCAGGGTTGCCACTTT
SlPAL-qRT-R	AAGGCCGCGTTGCCTAAAGAAG
SlCHS-qRT-F	TGGTCACCGTGGAGGAGTATC
SlCHS-qRT-R	GATCGTAGCTGGACCCTCTGC
SlCHI-qRT-F	CGGCGCAGGGAATAGAGGTTT
SlCHI-qRT-R	CCGTCAAGGGCAAGATCATAGTCAC
SlF3H-qRT-F	GTGAAAAGTTGATGGATTTGGC
SlF3H-qRT-R	GTAATGGTTCCTGGATCGGTGTGT
SlDFR-qRT-F	AGTCCAAGGATCCAGAGAACGAAGTA
SlDFR-qRT-R	TGGACATCAAGAGTTCCAGCAGAT
SlANS-qRT-F	GAACTAGCACTTGGCGTCGAA
SlANS-qRT-R	TTGCAAGCCAGGCACCATA
SlGT3-qRT-F	CGATCGAACGACGAAACACTG
SlGT3-qRT-R	GCAGCATAGATGGCATTGGC
SlAAC-qRT-F	CTTGCTGGAAGGTTGTCTGAAGATG
SlAAC-qRT-R	CAAGGTCACTATCTTTGTATGCTTTGTC
SlRT-qRT-F	CTGGCAATGCAAACAGAGTGA
SlRT-qRT-R	TCGACTTGCGGAAGAGTGAGA

## Sheet: Table S2
Table S2. Metabolites in ‘Indigo Rose’ and the Slhy5 seedling at different stages
Compound_ID	Name	Formula	Molecular Weight	RT [min]	Class(English)	CAS	W_1_H_1	W_1_H_2	W_1_H_3	W_2_C_1	W_2_C_2	W_2_C_3	W_2_HU_1	W_2_HU_2	W_2_HU_3	W_2_HD_1	W_2_HD_2	W_2_HD_3	H_1_HU_1	H_1_HU_2	H_1_HU_3	H_1_HD_1	H_1_HD_2	H_1_HD_3	H_2_C_1	H_2_C_2	H_2_C_3	H_2_HU_1	H_2_HU_2	H_2_HU_3	H_2_HD_1	H_2_HD_2	H_2_HD_3	H_3_C_1	H_3_C_2	H_3_C_3	H_3_HU_1	H_3_HU_2	H_3_HU_3	H_3_HD_1	H_3_HD_2	H_3_HD_3	H_4_C_1	H_4_C_2	H_4_C_3	H_4_HU_1	H_4_HU_2	H_4_HU_3	H_4_HD_1
Com_1_neg	D-(+)-Cellobiose	C12H22O11	342.3	0.91	Carbohydrates And Its Derivatives	"528-50-7"	94310	115900	80030	183300	200500	162600	66250	150900	96430	117400	99020	74920	52150	38790	49950	38540	40070	38080	72290	77500	80830	33680	41260	56780	39320	38270	35170	105700	77820	110800	44980	43600	37630	36820	47930	42520	194000	206800	251800	64630	74480	82430	60630
Com_2_neg	Naringenin chalcone	C15H12O5	272.253	8.518	Chalcones and dihydrochalcones	"73692-50-9"	183400	159200	289500	18710	15660	15020	36250	8956	20780	6868	8851	9575	60730	39690	39470	10880	13260	7038	56850	79420	70660	153500	104800	145500	9084	6044	15670	53760	77770	46330	212000	158800	199400	38320	46880	50080	38760	33260	35890	88870	79640	78660	48890
Com_3_neg	Choline bitartrate	C9H19NO7	253.25	0.97	Amines	"87-67-2"	30660	35050	34510	18350	9090	11010	6873	17950	27320	14910	22620	11380	26040	26560	26560	47330	31830	30510	30790	40570	37150	33770	17570	19600	24720	16380	18480	27420	39140	33810	20550	38720	28860	23480	31020	25750	44860	39740	24440	48970	27390	41730	27790
Com_4_neg	L-Histidine	C6H9N3O2	155.15	0.76	Amino Acid And Derivatives	"71-00-1"	4879000	5236000	5588000	77440	73750	87400	176400	211700	183600	121900	110800	87480	2502000	2533000	2617000	1394000	1235000	1479000	793200	837200	711600	1408000	1497000	1722000	981100	765100	959200	256700	917500	208000	243900	247800	218000	124200	109300	142400	225900	266800	220500	253600	255600	256000	117000
Com_6_neg	O-Acetylserine	C5H9NO4	147.13	1.056	Amino Acid And Derivatives	"5147-00-2"	453600	395600	408500	406800	264900	390200	172500	200500	179800	141000	162300	140200	259200	276000	262100	212600	219500	239700	312700	353400	326100	185000	256900	296900	168600	169700	165600	295100	283600	281300	174500	203800	169700	112500	118200	119100	303800	285600	324000	183100	159200	188300	131100
Com_7_neg	3-Methyladipic acid	C7H12O4	160.17	5.747	Fatty Acyls	"3058-01-3"	112500	89560	105900	78770	82690	98510	85710	89840	111300	101600	72360	101300	131900	113600	121900	110100	106000	135900	162900	177000	160500	99720	115500	94610	149500	89570	128200	152100	153100	147700	108100	144100	135300	147400	117800	134700	118500	99420	97330	118800	114800	112600	89950
Com_8_neg	L-Gulono-1,4-lactone	C6H10O6	178.14	0.948	Sugar Acids And Its Derivatives	"1128-23-0"	50460	36890	33980	118500	57780	118800	43130	50980	48520	25490	25010	28540	45480	59040	45690	37330	32750	48600	96250	84360	83710	38360	31460	33470	29060	27820	21140	142300	111700	107100	54060	53500	49460	28140	27290	28870	147200	177200	164500	74980	73490	60630	32620
Com_9_neg	1,6-Anhydro-beta-D-Glucopyranose	C6H10O5	162.141	2.3	Carbohydrates And Its Derivatives	"498-07-7"	11730	9364	12140	9330	2121	9846	7731	7131	6694	10410	15600	13890	4921	4442	5493	6407	7040	8273	6282	7869	4889	3589	4152	4747	11120	7702	8056	9725	8903	7460	7650	7678	7982	8329	7179	7017	9081	9517	8920	15440	13470	13410	8059
Com_10_neg	Trehalose 6-phosphate	C12H23O14P	422.276	0.96	Carbohydrates And Its Derivatives	"4484-88-2"	345500	380000	306600	143900	71990	120200	112000	182500	261100	121900	137900	111100	146800	154000	163500	95260	68880	70300	356700	478700	367700	112900	86650	99660	58560	61140	69600	237500	460000	322600	65810	79560	66910	35680	59760	42620	288500	285800	251100	94910	103300	97140	52290
Com_11_neg	9(S)-HOTrE	C18H30O3	294.429	12.07	Fatty Acyls	"89886-42-0"	577400	841300	300900	21890	7901	18470	36060	16570	44770	21910	55710	39480	225800	287400	309200	53020	32160	27410	717300	750800	1155000	82050	123200	58420	21990	35930	28280	305500	193600	291100	92050	29330	39360	19750	35280	31560	110300	230900	97850	32550	64410	32710	22390
Com_12_neg	6-Sialyllactose	C23H39NO19	633.551	0.73	Carbohydrates And Its Derivatives	"35890-39-2"	107600	96240	96420	97190	65190	106800	99430	103800	115700	132600	119600	149700	96830	95040	89880	90260	98050	77350	104000	101000	119300	125000	99450	110800	104300	76560	76280	91670	110700	91620	126200	122000	138800	76900	76810	75930	88500	82470	89590	170200	136700	152600	81660
Com_13_neg	Sinapyl Alcohol	C11H14O4	210.226	5.92	Phenols And Its Derivatives	"537-33-7"	1164	2134	2856	10170	7090	20570	4363	4254	3462	4266	6038	2062	4484	3239	1245	1223	572	2289	4731	5823	6118	1982	3976	2559	3513	819	2889	4685	8780	5439	3340	1066	2356	2152	2478	3267	6109	10330	7427	2034	4700	1362	3243
Com_14_neg	alpha-Benzylsuccinic acid	C11H12O4	208.211	0.71	Organic Acid And Its Derivatives	"884-33-3"	284300	215800	232800	775700	579200	790100	265000	325900	272500	424700	407600	385400	309900	347000	297900	495100	578800	563000	306500	324700	349200	301500	329200	323000	609800	586900	500000	607600	683800	532300	383300	405200	439800	478000	504200	499500	761900	744700	796400	510000	496200	504200	690800
Com_15_neg	UDP-D-xylose	C14H22N2O16P2	536.044	0.9	Nucleotide And Its Derivates	"3616-06-6"	1150000	882700	1142000	385800	107300	355200	518500	537400	615900	321000	253700	250100	483400	560700	602000	29580	51280	55840	903700	1255000	1213000	399700	588200	586300	66390	76580	30470	744100	716800	526000	367700	389300	273300	39860	23520	25570	481000	471200	452100	518500	688600	451000	157200
Com_16_neg	4-O-p-Coumaroylquinic acid	C16H18O8	338.1	5.93	Phenolic acids	"32451-86-8"	465400	526800	446300	211200	136300	252600	115400	171400	159900	48770	55820	43380	7139	15760	31860	66466	66558	73432	39300	68280	58940	10410	44330	46180	3114	1854	50293	69620	68720	75490	24570	47080	29140	23368	33728	25633	143600	155600	111900	54490	57250	65950	6489
Com_17_neg	(9Z,11E)-Octadecadienoic acid	C18H32O2	280.24	4.33	Fatty Acyls	"2540-56-9"	16090	17320	13330	21170	8935	18780	18000	22400	22460	21690	25040	28640	10690	13760	10100	13120	14810	14840	13810	13130	12880	13750	11730	13060	16390	16080	11510	14000	14510	11280	15970	19560	15870	16730	19990	18280	12260	14250	11020	19350	20740	20720	13490
Com_18_neg	1-O-Gentisoyl-D-glucoside	C13H16O9	316.079	4.56	Phenolic acids	"23445-11-6"	126000	124500	129600	8926	3516	20940	44260	25360	50580	41760	49400	43320	45790	42780	81070	24790	20660	37080	43170	37300	40940	33470	34950	49420	40430	32000	28330	19980	34150	15830	51980	61880	39690	35570	45670	30460	15830	30220	25410	86000	78220	82050	54670
Com_19_neg	9,10,13-Trihydroxyoctadec-11-enoic acid	C18H34O5	330.241	9.12	Fatty Acyls	"29907-57-1"	31180000	48160000	23470000	328900	135200	255900	2632000	426500	1316000	436400	1052000	1005000	20250000	22420000	26870000	10380000	7370000	7414000	24040000	31440000	37640000	14000000	11970000	11930000	7570000	7789000	8402000	9200000	9161000	8880000	14820000	9924000	16340000	6223000	7830000	5779000	6679000	7480000	4793000	14440000	17130000	11770000	7535000
Com_20_neg	D-Arabinono-1,4-lactone	C5H8O5	148.037	1.48	Carbohydrates And Its Derivatives	"2782-09-4"	295200	243600	421500	792600	838000	814000	1199000	1248000	1236000	1289000	1538000	931400	209500	134800	183300	28840	34330	52510	385200	672200	650500	156800	199200	145100	42130	26950	35970	995600	1188000	653300	747700	1121000	571800	151100	185200	157000	645900	732700	1099000	1517000	813500	1321000	614100
Com_21_neg	dATP	C10H16N5O12P3	491.001	0.73	Nucleotide And Its Derivates	"1927-31-7"	48450	43040	49280	68860	38500	78760	48660	36810	41860	60840	56230	55080	42130	56070	67770	47170	40810	63070	35930	57530	42740	40110	54700	42080	41550	55750	53570	82360	66400	82410	69680	67780	68860	39530	50650	32870	83810	63320	54290	99410	87930	92930	68760
Com_22_neg	2-deoxyglucose-6-phosphate	C6H13O8P	244.136	0.98	Nucleotide And Its Derivates	"3573-50-0"	169100	201100	169200	47980	2428	35950	44560	41260	45270	30610	20940	27640	134300	90210	94500	102100	104700	89340	114200	102200	98160	81140	91320	63230	72860	49170	59960	74220	60430	49950	60630	43730	51560	19720	33620	33940	65430	67440	53960	61920	69010	77100	24280
Com_23_neg	N-Acetylglucosamine 1-phosphate	C8H16NO9P	301.1	0.91	Carbohydrates And Its Derivatives	"6866-69-9"	269900	264700	178400	205800	132300	228000	165600	229700	238100	144600	145100	139100	76740	107300	116900	79010	96280	95890	227800	247000	247200	103400	106200	155800	123300	95260	75180	154600	139900	133800	94910	114000	91720	63600	96460	71620	122900	150000	132600	159300	154000	158100	54640
Com_24_neg	5-Phosphoribosyl 1-pyrophosphate	C5H13O14P3	196.25	1.01	Pentose phosphates	"97-55-2"	200300	233800	144600	40170	35330	45610	97030	92910	92480	43520	90110	64630	122800	141600	117200	174500	118500	63590	217500	243000	254500	155300	110600	161900	78040	108300	88560	69740	92310	53470	61570	65650	76380	128700	79860	111800	46470	296400	31710	73110	81510	48700	38870
Com_25_neg	ADP-ribose	C15H23N5O14P2	591.315	1.05	Nucleotide And Its Derivates	"20762-30-5"	983500	410500	988300	112000	23460	105200	202600	73770	141200	22610	44010	25660	150000	357600	514300	2608	63753	70763	1577000	1528000	1434000	265700	455400	967100	57120	64430	2114	278700	409000	378400	118500	151400	65060	5927	84890	62537	323200	287200	327700	153000	122500	157400	15800
Com_26_neg	Hydroxycitric acid	C6H8O8	208.124	0.9	Organic Acid And Its Derivatives	"6205-14-7"	10890	16280	11470	11820	10990	11670	12000	15360	8635	9838	13950	15090	10350	9944	14280	8070	13480	10380	14120	14720	20260	8825	7820	10430	14400	12190	7598	14270	12680	17210	8986	12300	8641	7425	8753	10990	16810	15130	16530	12300	14610	9010	12530
Com_27_neg	Phenprobamate	C10H13NO2	179.216	4.09	Amino Acid And Derivatives	"673-31-4"	65220	56470	65160	11480	7238	14110	8863	9350	10690	5213	7284	4362	65840	61490	63670	43950	45310	49800	25820	30110	27370	34640	36650	46520	39300	23960	28700	34930	40760	33560	13840	13290	15700	4741	6785	2403	26460	31790	26520	20820	22200	19160	5515
Com_28_neg	p-Coumaric acid 4-O-hexoside			5.54	Cinnamic acids and derivatives		286800	214800	237000	158700	82510	139400	162900	161800	170800	150900	203000	148800	27040	23920	39390	22110	14590	19640	117900	143400	128700	60860	69810	80680	15770	20480	17870	69840	68980	62690	93750	117100	99810	17090	27450	21350	120600	117300	113800	203300	181200	194200	57120
Com_29_neg	Ophiopogonanone C	C19H16O7	356.332	5.38	Flavonoids	"477336-75-7"	89140	133000	53380	753600	978700	892700	56780	838300	178000	457600	238300	169700	24564	26186	3860	2685	3368	5187	37163	44971	41428	4633	4050	4935	8128	6178	2685	3222	3763	2387	5990	4432	7372	4737	4047	8256	2609	43970	4618	13720	13090	9731	3987
Com_30_neg	Allantoin	C4H6N4O3	158.115	0.94	Organoheterocyclic compounds	"97-59-6"	93780	86760	79000	80250	73630	88020	58190	59520	66760	89110	81270	84310	122600	129100	112700	153600	157500	135600	97400	94480	80890	99020	92580	109400	158800	124900	119200	104800	123400	91710	96290	89820	84750	90400	98460	98690	89010	93300	80280	92490	92700	105300	95890
Com_31_neg	2,3-Dimethylsuccinic acid	C6H8O4	144.042	4.53	Amino acids and derivatives	"13545-04-5"	11710	10700	12870	3343	2550	3643	4210	4977	2985	5548	4437	4055	9524	6090	8985	3992	4418	5772	6975	7514	7203	2945	3784	4536	4860	2839	3953	4410	2979	3545	5096	5784	2494	4342	2998	3174	1549	1126	1395	3003	3539	3596	2770
Com_32_neg	Sucralose	C12H19Cl3O8	397.634	1.1	Carbohydrates And Its Derivatives	"56038-13-2"	11320	17930	16830	10200	3800	7420	10760	5817	6097	6562	4316	7409	13020	7504	9646	10840	9531	12880	16020	18250	19760	11380	5427	8289	7835	7764	5633	14690	12880	12090	15850	10260	6908	4459	10750	3193	12280	16600	14610	9623	9122	5268	7998
Com_33_neg	Methyl 4-hydroxycinnamate	C10H10O3	178.18	8.76	Phenylpropanoids	"19367-38-5"	62500	46380	59690	20610	20550	21390	30940	54180	77810	41600	51860	37090	2570	3512	4692	8769	8776	10426	25760	30060	25290	5630	11030	7706	9450	9641	3803	6871	9602	9332	13480	9337	9463	8809	1954	9447	11560	11510	13090	24000	20160	22920	9283
Com_34_neg	Corosolic acid	C30H48O4	472.7	13.22	Terpenoids	"4547-24-4"	36820	137800	117900	18090	25320	57880	18300	13380	13240	31330	21100	29560	221200	145200	120300	104800	55120	52670	61170	90410	85100	143500	149400	148600	46750	38250	44780	51800	8122	51580	70110	50730	31880	55220	43200	67120	27780	92300	50403	61890	67400	11330	15810
Com_35_neg	Ureidoisobutyric acid	C5H10N2O3	146.069	0.86	Organic Acid And Its Derivatives	"2905-86-4"	189600	201700	207100	9720	10520	16170	21060	29120	26300	11900	14530	10120	93860	102700	93570	94640	86630	102100	35230	36450	27920	76930	56240	80470	78160	63300	46910	28340	32620	30720	34780	32750	29940	10110	14410	9326	28270	36050	36420	59900	48550	51840	22630
Com_36_neg	Adenylosuccinic acid	C14H18N5O11P	463.293	0.91	Organic Acid And Its Derivatives	"19046-78-7"	23740	23470	22870	13410	11686	10420	19410	22230	28870	17500	25110	17770	22940	19780	17920	20490	21170	26380	15240	15190	21490	22100	22920	12900	19560	20080	20550	11040	13140	10040	15720	15050	17380	15770	18650	9930	11710	7641	2596	14830	11870	12700	7753
Com_37_neg	Butein	C15H12O5	272.069	0.95	Chalcones and dihydrochalcones	"487-52-5"	13060	19960	12933	14270	9195	12320	13490	12040	12270	13520	16940	11768	10293	9915	8413	10629	10753	7751	13280	10780	13770	4587	2969	3854	13845	16870	10734	13940	18970	16180	5928	16180	12960	5656	11890	9841	18880	8104	19890	12090	13480	9227	6994
Com_38_neg	N-Acetyl-Dl-serine	C5H9NO4	147.129	1.03	Amino Acid And Derivatives	"97-14-3"	19650	13200	10720	5278	10960	8036	6396	10470	5325	10940	4587	6965	19220	15450	13130	8485	13590	18530	16510	14980	9934	11750	11030	7478	9059	10860	14160	6574	7481	4839	8913	4150	8181	2587	12670	7598	5501	18620	5541	4509	6369	5354	4330
Com_39_neg	Isorhamnetin-3-O-neohespeidoside	C28H32O16	624.552	6.79	Flavonoids	"55033-90-4"	21230	22110	18140	5739	11940	11920	6189	17170	14070	9519	10150	2653	441	862	5670	443	2750	441	2658	3540	2190	442	885	440	433	3251	1770	2215	3100	3377	1767	442	1327	881	442	436	5306	3540	3531	3535	881	1323	441
Com_40_neg	LysoPE 16:0 (2n isomer)	C21H44NO7P	453.3	12.5	Phospholipid		628700	663000	1699000	531100	263300	406700	415700	265500	361300	264400	296600	335700	588000	588400	619900	633200	455000	452000	2702000	2398000	2732000	728400	487000	747700	504100	463300	599100	2677000	2749000	2253000	445800	505500	648800	535600	578900	753700	2043000	1900000	2250000	328100	830200	510400	688300
Com_41_neg	Purpureaside C	C35H46O20	786.737	5.91	Phenylpropanoids	"108648-07-3"	2538	3974	3758	25000	14930	31680	6567	11560	13390	10130	6638	4347	1888	4177	3599	6322	3115	2690	4617	2594	6105	1553	2845	2968	2671	2071	1830	6550	6854	3780	1905	3332	2515	1570	2350	1251	5153	7379	3195	2192	1885	2548	1482
Com_42_neg	Mannitol	C6H14O6	182.173	0.88	Carbohydrates And Its Derivatives	"69-65-8"	9229	5926	9979	10510	13450	11310	7760	5941	11070	12120	5001	9195	12480	8802	11380	7695	7644	12810	12960	15320	19190	7734	3612	15560	16840	13910	10200	13500	14470	16660	8526	7608	12270	10970	14130	10530	19930	14110	12380	11400	12180	14070	10630
Com_43_neg	Shikimic Acid	C7H10O5	174.15	1.038	Alcohols and polyols	"138-59-0"	513100	535700	526900	175300	156100	197100	162000	165100	153900	103800	114000	111100	51270	49270	55330	20500	24770	27510	213900	223100	245400	57430	47740	50900	38190	23710	24800	205500	225900	231000	180700	200000	186700	87970	95750	94680	332500	317400	308500	213600	241600	195000	104300
Com_44_neg	Myricitrin	C21H20O12	464.38	6.547	Flavones and Flavonols	"17912-87-7"	68430	95650	107300	392800	342500	401000	15880	167900	66770	128500	95090	59510	22270	26000	12290	2189	6375	3414	18890	36490	30250	5710	10060	34640	3068	3516	6163	29860	42170	29340	11450	19290	8301	437	1758	2860	36070	38430	30510	21100	19330	30690	9517
Com_45_neg	1-Caffeoylquinic acid	C16H18O9	354.095	5.46	Phenolic acids	"1241-87-8"	23110000	31480000	10660000	134300000	165200000	161200000	14470000	154500000	44400000	99740000	54530000	38820000	369500	593700	717200	113500	103500	149900	656600	855900	677100	631000	783300	1079000	116200	118100	130100	566200	640800	493400	1235000	1749000	1246000	118000	142400	88050	973200	732600	753900	2564000	2260000	2687000	496300
Com_46_neg	Isochlorogenic acid B	C25H24O12	516.451	6.768	Alcohols and polyols	"14534-61-3"	7546	13410	2927	6279	15340	9485	1248	19730	1954	10840	7501	4899	419	3129	4903	410	418	2459	3348	3296	2481	416	414	418	2455	2456	416	3371	4899	854	3207	1120	839	2648	3405	3408	2759	3118	3735	3277	2941	1018	2762
Com_47_neg	D-2-Hydroxyisocaproate	C6H12O3	132.079	7.12	Fatty Acyls	"20312-37-2"	108900	95530	87310	140200	69560	122000	86490	71830	100800	59190	59820	67490	110900	108000	103100	46880	50650	65400	289600	344300	308600	113100	113600	119600	74950	72600	69760	218100	217400	178800	112400	111200	123200	52580	68650	77590	158100	142900	134100	164300	142500	121200	69360
Com_48_neg	ethylmalonate	C5H8O4	132.042	1.82	Fatty Acyls	"601-75-2"	6616	7253	6275	45590	11440	51120	18140	17420	17260	12250	27570	18180	2424	2249	3835	11224	6810	9268	17810	19390	16390	1610	1677	2283	7878	8348	8371	54420	57430	45710	18440	22430	21610	6062	8872	5071	41870	49410	46620	38900	44820	31760	25140
Com_49_neg	Narirutin	C27H32O14	580.535	6.837	Flavanones	"14259-46-2"	2974	2521	5950	3226	427	4674	6796	18760	14030	9395	14020	5533	395	1723	3971	431	418	433	4155	428	3704	416	3240	854	3118	3043	883	861	4846	1321	3876	852	857	857	439	438	1109	417	2207	1712	2184	844	2121
Com_50_neg	Maltotetraose	C24H42O21	666.578	0.996	Carbohydrates And Its Derivatives	"34612-38-9"	2064	1820	3846	4371	1809	6352	1116	952	1376	1130	3210	1909	5403	3066	3280	3129	2978	1031	4493	4382	4161	2554	2869	2785	1599	2385	356	1595	4303	2781	2521	997	1953	1958	2149	3060	3679	3969	3558	3974	2530	507	1634
Com_51_neg	Butin	C15H12O5	272.069	8.61	Flavanones	"492-14-8"	150100	132200	228800	13060	9065	17680	30000	7337	13950	5780	7475	8394	39610	37590	32330	6787	10810	9033	43980	50480	49580	108400	79340	103200	4028	7043	9746	41890	50360	36400	164700	130100	142100	24990	34190	41750	30190	28670	28590	67790	56530	60520	40950
Com_52_neg	Ptaquiloside	C20H30O8	398.45	11.23	Terpenoids	"87625-62-5"	10400	11600	9689	7654	2137	11430	4279	9645	2660	7834	2014	2913	6359	21600	8560	3603	3256	5671	31020	27460	26220	10720	13350	8150	2421	5156	1732	38040	29460	17180	9719	6566	5257	2548	2815	3308	19420	30220	19410	5300	10030	6210	2556
Com_53_neg	Riboflavin-5'-monophosphate	C17H21N4O9P	456.344	0.91	Phenols And Its Derivatives	"146-17-8"	224900	144500	133000	60060	24680	75950	83870	96700	147800	72780	85530	76760	103700	112600	120300	67260	72070	86800	203600	228000	175200	64290	91960	139100	83430	71220	64160	142800	118900	97670	78050	91220	101500	49460	69090	47410	104400	94220	109100	186700	142900	140100	51790
Com_54_neg	trans-9-Octadecenoic acid	C18H34O2	282.461	12.86	Fatty Acyls	"112-79-8"	50910	66430	71020	12650	4604	12850	37770	26700	41890	27740	34950	48020	71280	75360	66540	57780	46560	36280	47350	51010	88630	50900	81040	45700	32320	48370	33790	31790	17140	25130	43530	20730	20250	40340	56970	55410	14480	19680	15400	13250	34640	14800	20710
Com_55_neg	Sakuranetin	C16H14O5	286.279	1.01	Flavanones	"2957-21-3"	16230	18860	12110	43670	58420	37000	14180	12230	12680	17730	20990	18000	15240	18030	10070	13620	20590	17410	15890	22290	20410	10940	15930	10440	14530	19620	21630	18010	32180	23150	18320	33290	22240	27580	29030	28720	33620	32940	37120	37050	26820	30460	44780
Com_56_neg	3-Hydroxybutyrate	C4H8O3	104.104	1.13	Organic Acid And Its Derivatives	"300-85-6"	325400	305400	328400	177900	109700	182300	202300	167900	207500	131600	184300	135600	261900	258700	242300	152300	156200	184900	243000	216500	265700	215900	233100	233000	160300	150700	126200	255200	274200	253500	286500	253800	270900	122700	168900	159500	240900	273700	254500	320800	312000	282100	270200
Com_57_neg	beta-D-glucopyranosyl-caffeic acid			5.29	Polyphenol		2587	4614	3565	17360	19100	17680	8415	11550	2475	28900	34870	20180	5011	4699	6139	34020	35230	48390	2704	4503	7252	3296	1803	5091	45280	43450	49790	6639	7954	1929	2825	2418	7884	40630	47170	41420	2891	3864	4245	5439	4143	2643	24530
Com_58_neg	Lysope 14:0	C19H40NO7P	425.5	11.27	Phospholipid		10650	13240	10280	2684	2766	2997	1661	1541	2385	4168	3946	2979	6473	5667	8578	20350	7767	7281	8183	9399	9684	3907	4221	3460	4855	5856	6398	2284	4443	2318	1701	13760	1802	4024	4665	2996	1341	2703	3211	4085	1724	4049	1644
Com_59_neg	Lysope 16:0	C21H44NO7P	453.55	12.48	Phospholipid	"53862-35-4"	615800	679200	1681000	536100	253900	370600	409400	266000	345300	258300	275200	353200	593500	590600	618300	619500	438700	480800	2637000	2556000	2688000	716900	446500	726500	491300	461700	618800	2634000	2712000	2067000	426400	520600	636000	512600	584300	721900	2050000	1823000	2165000	332500	769500	498100	669700
Com_60_neg	Lysope 18:1	C23H46NO7P	479.588	12.81	Phospholipid		534500	921000	979800	45890	22720	33510	88830	67850	94350	36300	49170	67160	848000	726800	842900	509000	351600	319400	298500	363800	391100	473100	490600	378500	210400	239100	252700	123100	126100	107100	159400	148100	152800	155500	225500	199500	101800	95280	77940	82070	108700	77650	76330
Com_61_neg	N-Acetylalanine	C5H9NO3	131.13	2.15	Amino Acid And Derivatives	"97-69-8"	118400	103200	109500	229400	118700	253900	27230	25910	26450	13630	15950	17530	46770	35270	42400	20490	18450	21440	428000	462100	457700	37460	36610	46100	30690	25180	28310	343200	355500	303700	43630	43240	41790	28140	29320	25950	326900	372100	328000	46270	44640	41280	22860
Com_62_neg	Angelol B	C20H24O7	376.4	0.98	Coumarins and derivatives	"83156-04-1"	17890	21820	19750	28540	15630	24280	21740	24130	23730	20160	32690	27460	16950	27180	15310	13240	10460	12680	32250	34560	36750	15930	19720	14140	12720	18180	13760	49520	36510	36070	30470	17270	38070	22250	25270	20770	31130	33590	34560	34870	38560	37770	17570
Com_63_neg	Mogroside IVa	C54H92O24	1125.31	7.44	Steroids and steroid derivatives	"88901-41-1"	27960	30330	39340	21100	19210	31680	26230	24380	39630	35350	28610	24220	28440	29350	26510	27270	24660	27910	29100	23380	32830	29870	21620	25950	20380	21100	25320	28370	27310	19210	31540	25530	28350	26400	26510	16190	35840	25410	21430	26290	32750	33660	24580
Com_64_neg	Anthranilate O-hexosyl-O-hexoside		461.1	0.98	Benzoic acids and derivatives		449500	476700	428900	59450	52350	62360	185400	155300	170900	129900	164700	108400	319400	283700	220200	212200	211500	249800	177500	210600	173000	256500	222200	271100	212300	211400	247900	147600	241900	169300	142900	165700	214400	65200	95260	84370	225700	208100	201700	363500	374500	298900	116600
Com_65_neg	1-Indanone	C9H8O	132.16	18.28	Pyridines and derivatives	"83-33-0"	1968000	1933000	2126000	2137000	1888000	2033000	2011000	2041000	2077000	1938000	2094000	1963000	2085000	2173000	2021000	2134000	1992000	2178000	2026000	2117000	2076000	2083000	2077000	1975000	2062000	2166000	2146000	2196000	2230000	2045000	2045000	2143000	2047000	2044000	1975000	2018000	2083000	2101000	2134000	2069000	2264000	1970000	2012000
Com_66_neg	Anthraquinone-2-carboxylic Acid	C15H8O4	252.222	9.72	Anthracenes	"117-78-2"	475800	507400	485000	470200	488900	465500	475800	469000	479200	472500	458300	448300	448400	478200	468400	465300	490100	495500	498700	514600	469800	457100	468400	486500	479400	480500	507000	470300	481400	473400	479200	449900	473400	464600	497300	486000	479700	486300	497800	491000	472800	478400	490300
Com_67_neg	4-Hydroxyquinazoline	C8H6N2O	146.146	5.54	Organoheterocyclic compounds	"491-36-1"	1065000	780900	825300	268100	186500	261000	115200	216700	217300	174100	157100	148600	21230	48210	87280	3102	66051	77123	623500	770200	630900	60940	170900	214000	3807	8654	69716	269600	289200	176300	32900	59970	31720	55583	73725	68738	323900	288500	273700	72850	60160	74210	33670
Com_68_neg	Kuwanon A	C25H24O6	420.454	0.7	Flavonoids	"62949-77-3"	8676	8722	4912	57340	41730	72030	4849	8303	5269	15800	19640	9418	12850	8057	8145	42450	39930	46290	12030	9045	8074	11140	6404	6405	52300	43870	37930	53760	56480	53780	20950	18780	22470	43100	38050	42880	81320	94260	97930	24090	21980	27160	59120
Com_69_neg	Kinetin 9-riboside	C15H17N5O5	347.326	1.03	Anthocyanins	"4338-47-0"	364200	310900	209900	172900	123000	180400	50550	70280	71370	56510	37230	24490	13200	15430	24200	6301	4554	42121	337800	588500	505900	18730	28830	21360	3728	2298	35458	214900	207000	140500	15640	19060	9803	2068	35132	35758	318300	375600	497300	13880	12700	13050	3460
Com_70_neg	Isocitrate	C6H8O7	192.124	1.49	Organic Acid And Its Derivatives	"320-77-4"	82890000	74710000	78120000	324800000	180200000	339700000	366900000	362300000	417300000	297000000	344400000	307800000	40500000	35390000	40020000	3961000	4229000	4594000	126200000	146600000	138200000	43750000	49840000	47470000	4602000	4232000	3251000	286600000	255600000	270900000	238900000	233400000	237500000	38040000	44950000	42220000	251400000	258500000	230400000	331600000	314900000	288700000	174500000
Com_71_neg	Inosine diphosphate	C10H14N4O11P2	522.149	0.98	Nucleotide And Its Derivates	"86-04-4"	47260	40820	40200	19620	8747	18500	10260	11060	5878	10719	7712	3194	23680	34810	27680	11880	11910	18420	30660	39770	31970	21840	16500	17660	15080	10590	8607	15360	29560	34350	9452	12760	11040	7829	11520	5353	25780	24840	26630	11650	13650	10220	14520
Com_72_neg	Quercetin 3-O-sophoroside	C27H30O17	626.524	6.13	Alkaloids and derivatives	"18609-17-1"	3952000	4561000	4155000	1345000	1562000	1489000	246000	3661000	1647000	2574000	2212000	1367000	1442000	1003000	762700	389400	417500	633500	915200	1201000	1076000	425300	546100	1142000	454600	368000	354700	361100	342700	305000	303400	459000	128900	255800	378500	303400	212500	157300	145800	452500	391200	436400	271600
Com_73_neg	Quinic acid O-di-glucuronic acid	C19H28O18	544.1	1.41	Sugar Acids And Its Derivatives		4754	3632	4079	7884	3967	11220	11570	11240	17010	18060	9667	16330	1744	4977	2036	4526	3998	845	6733	10190	3732	2439	867	961	973	4567	4014	12650	8985	8989	12040	10390	3775	1439	1648	3802	2632	11150	7413	13200	11290	7616	5820
Com_74_neg	Melibiose	C12H22O11	342.3	0.96	Carbohydrates And Its Derivatives	"585-99-9"	2560000	2743000	2300000	3763000	5862000	4149000	1750000	3940000	2513000	2939000	2798000	1969000	1465000	1373000	1201000	1101000	1153000	1274000	1143000	1476000	1389000	1268000	958300	1401000	1109000	1204000	1139000	1095000	1310000	1473000	1262000	1120000	1367000	1076000	1242000	1041000	2950000	3557000	4648000	1810000	1732000	2001000	1848000
Com_75_neg	Tricin O-saccharic acid		522.1	6.58	Flavonoids		122500	110800	92560	149700	91670	135900	130100	242300	192400	315900	387800	228800	75520	86890	81460	86810	84310	110300	119200	152600	136200	70410	96840	88200	99900	90270	87880	134200	161800	113900	113300	125700	113600	86980	131200	97970	135800	159700	152800	190800	231100	170000	180300
Com_76_neg	D-Panthotenate	C9H17NO5	219.235	4.59	Amino Acid And Derivatives	"79-83-4"	592700	532500	585700	495200	273400	521300	798100	807300	845800	602700	681100	609500	520100	494800	479600	487400	462400	504400	1279000	1332000	1341000	507800	608800	705900	566200	551000	530800	1036000	956900	858700	1105000	1018000	1093000	633800	764300	630400	846800	756800	707200	1237000	1164000	1013000	763700
Com_77_neg	N-Acetyl-L-aspartate	C6H9NO5	175.139	1.65	Amino Acid And Derivatives	"997-55-7"	58740	12920	21040	50910	40280	60400	46560	76480	64670	27880	50730	44580	21670	6908	30890	13300	17613	19200	44990	38560	43630	11710	43120	21310	19185	9671	13280	67060	54780	51620	45940	74620	54440	28350	13400	37160	52410	55230	58770	66070	40740	70800	44850
Com_78_neg	Phosphoenolpyruvate	C3H5O6P	167.982	0.97	Organic Acid And Its Derivatives	"138-08-9"	104900	135300	78590	241700	46310	240200	155700	247900	165600	93410	114900	53170	46880	62240	69360	52990	34030	38070	1172000	1433000	1546000	88650	85280	55780	30290	61050	37400	683500	995400	830600	53070	48890	48930	35750	30040	38040	912200	1068000	1314000	43660	44530	53420	19450
Com_79_neg	Myristoleic acid	C14H26O2	226	8.46	Fatty Acyls	"544-64-9"	62460	49680	36360	17390	12180	23480	10970	15110	11140	19110	21100	11000	30940	19900	25570	18060	14840	20860	31170	16290	26540	18170	16990	12350	26950	12480	14600	11690	24820	11460	25730	8182	18870	19040	34420	21260	13310	15650	10990	14070	18070	11060	11910
Com_80_neg	Acacetin O-acetyl hexoside		488.1	5.69	Flavones and Flavonols		28700	28230	27400	9512	7640	11434	9459	16080	11710	8372	8987	8248	7306	4893	1529	5514	4876	1334	6629	7347	5797	1871	7557	7717	5751	4283	4592	1437	2117	2141	4697	5705	2856	2874	2743	3509	2301	1008	2879	10590	5687	13350	3397
Com_81_neg	Madecassic acid	C6H12O5	164.156	0.99	Terpenoids	"18449-41-7"	35450	26710	42060	49480	22460	38870	33480	35110	35420	10770	22800	16220	22310	12130	16840	8454	10630	9229	66190	53590	71150	15190	13100	25490	9495	14740	6881	71510	81000	103900	43520	36580	43570	13870	19720	14690	116700	110800	115900	81210	78220	58060	36100
Com_82_neg	13-HpOTrE(r)	C18H30O4	310	10.93	Fatty Acyls	"121107-97-9"	75150	74960	79580	86830	82580	84390	85970	84580	84240	81290	75510	86410	77400	70470	88840	86010	91070	86380	74990	90050	80040	88960	89020	86730	81850	80400	80230	85270	87450	80660	88130	83970	88830	88840	85690	85130	88250	91360	88860	87760	83540	86880	91540
Com_83_neg	Bisulfurous Acid	C11H8O2	172.18	0.95	Quinones	"58-27-5"	16880	17890	16050	17030	10810	16670	15220	14600	8324	8025	11390	13310	9406	9082	11050	11450	5912	4679	12500	19830	13830	3564	6669	7800	14660	3615	6142	19690	18260	15130	12270	10410	12870	6177	9655	6734	22130	26780	14330	8597	15130	18680	9243
Com_84_neg	Diallyl sulfide	C6H10S	114.21	18.46	Organosulfur compounds	"592-88-1"	7610000	7673000	7644000	7572000	7651000	7505000	7518000	7611000	7711000	7562000	7617000	7674000	7750000	7560000	7687000	7540000	7594000	7534000	7674000	7629000	7605000	7600000	7596000	7880000	7460000	7600000	7747000	7671000	7774000	7603000	7675000	7684000	7572000	7579000	7650000	7574000	7607000	7567000	7743000	7661000	7613000	7636000	7553000
Com_85_neg	Cinnamyl acetate	C11H12O2	176.21	0.89	Benzene and substituted derivatives	"103-54-8"	34110	38890	50480	30190	32060	28890	19990	17920	18150	32780	20910	19530	26470	33010	34800	41290	30890	44040	48400	44620	39670	33010	23610	27620	40720	27710	37780	42800	32590	38330	26750	30870	23640	16890	34160	28350	53990	76360	49660	23110	28560	41950	19640
Com_86_neg	(-)-alpha-Pinene	C10H16	136.23	18.287	Terpenoids	"7785-26-4"	742500	733200	755100	341200	321800	711500	692800	330800	702900	304900	297000	720400	347700	317600	686500	703300	299900	296100	301200	680200	685200	304200	305700	699300	687400	695500	679000	290500	683900	284500	676400	286700	671300	683100	670200	283800	670600	283700	669300	299300	660900	667400	272900
Com_87_neg	Methyl furan-2-carboxylate	C6H6O3	126.11	1.25	Organoheterocyclic compounds	"611-13-2"	58680	22010	28230	18290	5114	7841	16740	6940	12850	7508	14050	4765	16790	29470	22190	28380	28920	10710	26170	39960	23950	45070	11730	11380	20710	14030	13680	15160	10790	42250	10130	16210	34460	12120	3765	15970	29390	5659	6349	33820	25900	35170	14830
Com_88_neg	Acetyl tryptophan	C13H14N2O3	246	6.78	Amino Acid And Derivatives	"2280-01-5"	12240000	11510000	11350000	689500	440600	876200	8561000	9867000	9148000	5175000	5501000	5318000	4678000	5086000	5201000	2740000	2878000	3124000	2036000	2891000	2224000	5676000	5650000	6179000	3235000	2727000	2630000	912000	891800	747900	4846000	4296000	5057000	2123000	2853000	2288000	670000	481800	559400	5375000	4654000	4606000	2451000
Com_89_neg	N-Acetyl-L-methionine	C7H13NO3S	191.25	5.315	Amino Acid And Derivatives	"65-82-7"	32230	17390	47940	6272	2738	4915	5536	7724	6068	3000	7797	2987	15500	13730	7480	6820	5477	4378	35740	35910	35970	7708	6337	11630	8217	6914	11070	22780	23240	25630	8323	8197	11150	12780	8576	8306	20120	15500	18310	11350	14920	11630	8068
Com_90_neg	Octanedioic acid	C8H14O4	174.19	6.649	Organic Acid And Its Derivatives	"505-48-6"	80830	75640	76760	87730	95210	85400	84940	80910	89330	69520	90960	72130	98190	103000	86200	96140	81870	103400	97610	91670	117900	118600	81670	95680	127500	90410	80870	111900	114900	83470	106000	114600	83760	95730	103700	147400	100700	74150	94340	102800	91610	119000	87940
Com_91_neg	Indole-2-carboxylic acid	C9H7NO2	161.16	0.927	Indoles and derivatives	"1477-50-5"	15420	17210	12470	8354	6044	9121	3423	4159	4440	7390	6628	3824	12510	9400	10390	8816	5859	9778	16630	17100	7827	6767	6400	11830	6547	7156	7177	8414	3125	12770	8219	8369	6131	3282	3138	5206	8653	5288	10190	7972	6982	4762	7154
Com_92_neg	Tartaric acid	C4H6O6	150.09	1.008	Organic Acid And Its Derivatives	"87-69-4"	15040	25120	10790	12350	3044	6650	9066	12750	37000	3216	9481	10180	11010	16930	10110	9541	18880	10240	29840	20840	38500	8190	15690	9656	5799	4738	12000	18380	14530	18680	17360	10680	25060	11920	19400	22150	16020	20470	21470	21660	36750	24020	12430
Com_93_neg	Ferulic Acid	C10H10O4	194.19	6.881	Polyphenol	"1135-24-6"	24183	25311	5768	16990	12490	20590	4836	5427	4199	13490	12180	16109	27550	44150	45260	90670	58640	74090	149600	187600	186900	44550	41150	29290	92780	58640	88470	55830	58100	43530	13130	8875	14570	17410	35120	22950	33080	41680	28960	17190	12930	13530	2744
Com_94_neg	Hesperidin	C28H34O15	610.56	7.09	Flavanones	"520-26-3"	822	2889	2893	1982	2130	3081	4007	2061	2492	1226	3476	1812	2487	3299	3291	3555	2491	828	3830	1685	1648	3714	1240	2484	3435	3019	1237	2483	2071	2075	3255	415	1240	2068	2905	3292	1648	414	410	824	1490	2168	822
Com_95_neg	Chlorogenic Acid	C16H18O9	354.31	5.37	Alcohols and polyols	"327-97-9"	187000	256600	89130	2060000	2757000	2461000	208400	2820000	579500	1580000	889700	573300	4970	5324	7145	22652	23351	47441	2676	10980	2882	7344	11570	11120	33355	2446	1730	9762	6979	7933	16390	27240	12410	22362	3268	22188	11780	9464	8507	35770	32090	34920	7692
Com_96_neg	Adipic acid	C6H10O4	146.058	0.86	Organic Acid And Its Derivatives	"124-04-9"	8164000	8034000	8506000	624700	479300	595100	962700	1234000	985100	536800	579500	488300	4370000	4070000	4425000	3971000	3950000	4164000	1395000	1589000	1237000	2865000	2524000	3112000	2958000	2486000	2485000	1301000	1273000	1230000	1401000	1553000	1261000	532100	538900	551100	1401000	1442000	1466000	2328000	2191000	2271000	838800
Com_97_neg	2-Oxoadipic acid	C6H8O5	160.037	0.72	Organic Acid And Its Derivatives	"3184-35-8"	94840	72850	94330	60930	46710	56000	73850	66720	73910	66120	72760	59850	73640	61340	61400	51390	43360	47970	64040	51220	64900	57700	66250	68720	50730	38560	40570	54890	48110	49900	60300	60480	55110	36250	48590	31700	48570	53170	48250	72780	82640	74960	56320
Com_98_neg	Sorbitol 6-phosphate	C6H15O9P	262.045	0.86	Carbohydrates And Its Derivatives	"20479-58-7"	1147000	1219000	1139000	360000	274900	403200	474400	431200	467900	315800	362900	290100	972500	990100	1011000	652800	583900	636200	1165000	1282000	1413000	786400	884700	941400	547500	576100	498800	643400	692800	603200	446000	501100	438600	359700	365500	330800	544800	577300	623100	478400	418300	468600	266800
Com_99_neg	dADP	C10H15N5O9P2	411.202	0.75	Nucleotide And Its Derivates	"2793-06-8"	24690	28820	18450	13400	15710	13230	18910	19630	19520	17890	21530	21560	21490	25040	25100	17630	16850	18430	20310	21770	21050	24180	17250	28330	15210	20220	10160	13400	11320	20650	16080	22000	26190	20180	20260	23620	11460	5874	15240	15200	11560	15820	19450
Com_100_neg	p-Hydroxy-cinnamic acid	C9H8O3	164.16	6.531	Cinnamic acids and derivatives	"7400-08-0"	170600	142500	146400	93370	55600	94440	68130	66910	66282	24000	28250	48110	56945	59461	54420	39428	26950	54172	234200	276100	256000	73590	100900	74900	37190	24420	22870	189900	169900	120300	59070	58100	64210	48180	55653	50886	231200	199500	155900	113200	124300	33890	58550
Com_101_neg	Caffeic acid	C9H8O4	180.16	5.801	Cinnamic acids and derivatives	"331-39-5"	205300	325900	126400	1200000	1543000	1449000	170600	1416000	211500	825700	225900	407600	46248	46058	37914	114100	160000	280400	90784	115800	89384	31458	35063	47295	180400	200800	103500	92268	92827	104752	35907	45202	29280	141100	148000	125600	121870	81290	150489	60661	112400	64650	40496
Com_102_neg	N-Acetylornithine	C7H14N2O3	174.2	0.896	Amino Acid And Derivatives	"6205-08-9"	50610	42370	56970	107300	49880	111200	48360	54040	52400	52920	41620	34130	27340	14350	16300	23473	23086	10530	48210	28400	45690	23916	26461	19400	22735	19336	10510	43030	75740	59410	34060	50550	30210	17970	32650	22440	89310	80710	80160	69920	43700	48220	45180
Com_103_neg	H-HoArg-OH	C7H16N4O2	188.23	0.807	Amino Acid And Derivatives	"156-86-5"	49510	39680	39580	8059	6045	4864	8266	2573	6646	2598	3508	3219	28000	31030	17110	11740	15690	15760	33590	30390	18740	9768	10160	15180	10220	10140	11680	4207	8861	4149	6467	3003	4199	2641	7519	3799	4070	3218	10420	9865	9738	2884	2654
Com_104_neg	Thiamine pyrophosphate hydrochloride	C12H19ClN4O7P2S	460.77	0.915	Vitamins	"154-87-0"	75600	78310	55060	22290	7869	15750	15160	18260	28670	11180	21700	18630	29260	27050	34700	6229	7101	10410	79670	81620	95890	21040	24420	24770	5268	15977	4128	34720	46080	25410	12880	9335	9345	14164	3726	13932	31980	26960	31880	13850	12140	3897	14360
Com_105_neg	D-Glucuronic acid	C6H10O7	194.14	0.894	Carbohydrates And Its Derivatives	"6556-12-3"	384500	390500	513900	957000	501600	1083000	443400	518300	445100	278000	342300	281600	551500	558100	475200	388800	355200	361800	1680000	1629000	1545000	487200	467000	508500	348500	278600	344000	2537000	2396000	2498000	877500	883000	892400	430300	533700	514100	4493000	4749000	4185000	2807000	2678000	2663000	1255000
Com_106_neg	Ureidosuccinic acid	C5H8N2O5	176.13	1.031	Amino Acid And Derivatives	"923-37-5"	139400	113700	121900	243400	186800	246900	177600	195100	196400	102600	101600	98270	106400	107300	102200	47290	73970	62950	77340	77790	74780	108700	86590	123400	64580	49590	52750	373700	331100	287800	303900	303400	303500	92240	87670	98490	470000	383600	386500	560000	555600	565600	236800
Com_107_neg	L-Lactic acid	C3H6O3	90.08	1.487	Organic Acid And Its Derivatives	"79-33-4"	33550	33870	29830	4631	3496	12478	9626	19618	8667	12960	13610	6998	55620	26790	32680	44100	26310	43560	4117	6922	7890	24700	20820	17110	68590	34720	65020	9746	54900	4384	20920	49980	17590	32320	23220	49220	3861	5397	14120	13050	15690	14820	15900
Com_108_neg	Uridine 5'-Diphospho-N-Acetylgalactosamine	C17H27N3O17P2	607.354	1	Nucleotide And Its Derivates	"7277-98-7"	285300	242700	239900	73280	30660	76900	133100	155900	152900	92040	70440	69060	123400	150400	102600	22640	31130	36000	174700	185000	154100	126100	175300	180500	50220	65310	28620	113900	91940	70410	131800	109900	119700	25090	29550	21870	69340	81390	60510	176900	132600	165500	56800
Com_109_neg	UDP-galactose	C15H22N2Na2O17P2	610.265	0.92	Nucleotide And Its Derivates	"2956-16-3"	84480000	83050000	74590000	24620000	15280000	25470000	24680000	29520000	30340000	19180000	21750000	18850000	35060000	42260000	42970000	4840000	8046000	6421000	30740000	32260000	29190000	32190000	39150000	44930000	8304000	7674000	6274000	21960000	22540000	21430000	24940000	29360000	22100000	5344000	3888000	3479000	23160000	22830000	20200000	35880000	29570000	31080000	11460000
Com_110_neg	Ribose 1-phosphate	C5H11O8P	230.11	0.9	Carbohydrates And Its Derivatives	"14075-00-4"	1562000	1609000	1541000	583000	354000	609200	642100	655600	702900	468500	463700	420600	1242000	1231000	1162000	1158000	1108000	1083000	1782000	2012000	1940000	933200	956500	1180000	1126000	1047000	1036000	1198000	1183000	1138000	803800	829000	767800	666100	843400	750100	1054000	1063000	1041000	910600	833600	788400	682700
Com_111_neg	s7p	C7H13BaO10P	425.473	0.87	Carbohydrates And Its Derivatives	"2646-35-7"	869400	762800	753100	515400	360200	1361000	461900	615100	618900	242200	287100	251600	441900	566900	529200	188100	244800	255800	3410000	3704000	3774000	475400	567000	827700	369400	344200	282400	3702000	3135000	2886000	1113000	866500	763200	263700	413800	280100	2507000	2788000	2270000	2208000	1707000	1246000	349700
Com_112_neg	Succinic acid	C4H6O4	118.09	1.936	Tca Cycle	"110-15-6"	18080000	18620000	17710000	12260000	6203000	12900000	7418000	7524000	8091000	6063000	7601000	6434000	22020000	21670000	22360000	14310000	15820000	15490000	15820000	16970000	16510000	22280000	23570000	25770000	20140000	19780000	18440000	14000000	13080000	12360000	59360000	59270000	58860000	54070000	65180000	59040000	12740000	13170000	12050000	43710000	40050000	34580000	71730000
Com_113_neg	Ribitol	C5H12O5	152.15	0.927	Sugar Alcohols	"488-81-3"	69780	59330	59520	82070	38180	67700	84630	74750	70890	62220	82500	51320	40880	54630	52220	33480	33690	29380	97640	90210	83560	43390	43030	38530	41320	38830	32050	81390	80100	63080	52760	58670	54630	30400	45920	34950	87510	72010	83260	75200	78570	76170	42210
Com_114_neg	1-O-p-Coumaroyl quinic acid	C16H18O8	338.1	5.95	Alcohols and polyols		546800	655800	594100	312600	186300	364800	165600	289200	254300	79760	104200	91770	5328	19170	31510	63936	54392	60402	49640	82970	64180	20230	43670	65420	55700	52747	60465	105700	105000	88510	41690	59540	35380	54338	59004	53380	201500	183800	141600	110800	75200	100500	12860
Com_115_neg	cis-Vaccenic acid	C18H34O2	282.256	15.78	Fatty Acyls	"506-17-2"	175500	153800	149000	187800	202400	179600	178300	180200	191300	204600	228300	142000	242000	146400	188900	167800	117700	209600	252300	279500	444500	231200	206400	244600	297400	262100	210900	182400	278300	261600	258500	249200	166400	260500	263100	214200	112400	157300	239300	121200	136200	142500	291300
Com_116_neg	D-Galactaric acid	C6H10O8	210.038	0.87	Carbohydrates And Its Derivatives	"526-99-8"	5540000	6250000	5062000	11340000	5508000	11380000	18240000	18520000	21830000	9043000	14160000	11330000	10630000	11880000	11750000	5416000	5600000	5417000	42990000	40170000	40390000	12290000	12610000	11770000	6235000	6040000	4735000	75740000	77060000	81940000	39710000	40840000	40680000	13200000	13450000	11580000	76840000	80450000	79410000	67620000	77730000	75950000	38650000
Com_117_neg	alpha-Arbutin	C12H16O7	272.25	2.33	Carbohydrates And Its Derivatives	"84380-01-8"	1634000	1629000	1485000	201400	95110	169300	381000	423800	408700	379800	427300	365000	229700	311700	437700	32690	62890	77370	805800	954000	901600	298200	448000	457300	56600	84140	75540	310500	299500	226300	374300	350500	383200	105000	81500	95920	312100	309500	297800	697700	647300	580400	307300
Com_118_neg	Koaburaside	C14H20O9	332.111	4.68	Phenolic acids	"41653-73-0"	10890	8701	7416	15530	14410	13350	9929	37140	18110	58580	48060	31340	5488	4625	6856	5209	4520	5353	8651	9266	8953	2820	2726	5890	8094	6054	4370	6630	7088	6254	11300	13470	9824	8440	8940	13340	9840	7284	3516	25710	29040	19630	32290
Com_119_neg	Ribose 5-phosphate	C5H11O8P	230.02	0.84	Carbohydrates And Its Derivatives	"4300-28-1"	1554000	1488000	1070000	566100	266100	563200	622800	673600	721500	426900	402700	472000	659500	832600	806700	608300	595400	557100	1529000	1660000	1464000	727900	791900	868100	523900	559900	553400	959000	1035000	968900	575900	609200	437000	410900	430800	407300	893400	995900	971500	679700	570200	555800	444700
Com_120_neg	3-Hydroxyoctadecanoic Acid	C18H36O3	300.267	13.6	Fatty Acyls	"45261-96-9"	531700	530800	531700	501800	572000	504600	573000	534100	615200	584300	657600	574100	556000	575300	612800	682300	581500	675700	544100	579100	700800	583200	567500	637400	628600	599600	595900	641000	626900	586000	620200	618200	610100	599000	609000	613800	598500	624100	713000	619600	611900	619300	577700
Com_121_neg	3-Ureidopropionate	C4H8N2O3	132.053	0.82	Organic Acid And Its Derivatives	"462-88-4"	5144000	4869000	5229000	318500	235400	358000	654900	756100	584200	294500	253900	250300	3005000	3036000	3324000	2421000	2354000	2600000	1533000	1733000	1416000	2284000	2177000	2779000	1976000	1808000	1771000	724500	718100	611300	772600	731700	617200	299400	255000	236600	526000	644900	541100	968700	1091000	832700	275300
Com_122_neg	Ayapin	C11H8O3	188.041	7.3	Coumarins and derivatives	"494-56-4"	282000	247400	280600	160600	164300	188400	190700	160900	202100	196200	177200	197700	561700	502200	744600	342300	345200	314800	486800	567100	631700	397700	302500	313900	342200	277100	267000	312600	309900	267600	285800	274400	335200	251600	261900	277700	248800	232800	245200	286100	325900	271700	224900
Com_123_neg	(2S)-2-Isopropylmalate	C7H12O5	176.068	5.52	Organic Acid And Its Derivatives	"49601-06-1"	80850	67520	66000	353200	178100	429500	72510	77150	98160	44320	105200	43300	32630	28730	35610	23290	29600	39330	400500	414700	438900	65040	77000	79400	38260	46130	44340	541400	511700	435100	297500	340200	277900	126500	170500	132500	413800	545400	896200	528900	494500	420000	432000
Com_124_neg	Guanosine 5'-diphosphate	C10H15N5O11P2	443.201	1.08	Nucleotide And Its Derivates	"146-91-8"	17880	16470	25940	7003	5852	7713	20250	25300	23560	13040	20630	5083	16130	20220	10730	9878	9613	9125	20620	27700	22810	13450	18920	13990	11870	8934	10690	18000	14030	18430	14380	9325	16300	6761	8909	16540	15280	16530	17020	17600	20220	27110	10910
Com_125_neg	Malonic acid	C3H4O4	104.011	1.19	Organic Acid And Its Derivatives	"141-82-2"	612000	536100	559100	336200	189300	311000	403900	304700	361400	260600	309600	275500	558200	511400	484100	276800	269300	279500	392700	439800	396100	403900	410900	468900	262900	228700	245000	521900	487900	477500	500500	495000	569800	255500	343600	274200	523300	489400	495000	658200	569400	577800	507400
Com_126_neg	Guanine	C5H5N5O	151.126	2.77	Purines and purine derivatives	"73-40-5"	500000	424800	468300	58710	27060	54460	228400	90220	202900	53300	115200	116700	303400	237400	280400	35000	38530	32840	815500	780400	796900	312900	325200	333800	58380	69880	66550	624100	570700	499000	313800	278200	339100	64440	66260	64350	544500	549700	410800	422100	472600	329400	194000
Com_127_neg	Jasmonic acid	C12H18O3	210.27	8.98	Phytohormones	"3572-66-5"	9390	4768	9067	1182	1304	9104	4379	3703	19130	6740	23520	7011	1063	910	5261	488	3935	6576	7191	11250	7761	6544	5157	4643	1021	1488	6987	20930	18210	13490	18880	14520	26390	6918	7312	4535	11700	4252	7633	7132	14330	22570	5653
Com_128_neg	Kaempferol7-O-beta-D-glucopyranoside	C21H20O11	448.377	6.65	Flavones and Flavonols	"16290-07-6"	16500	29130	25450	21250	10450	28010	10822	33710	24470	16670	15760	7370	6329	2643	6334	2147	371	2951	9533	12561	10040	4894	3068	7511	5898	807	3148	7169	3594	7460	4101	2389	4353	1288	4924	4148	8169	7390	8042	6789	10163	5856	4835
Com_129_neg	cis-4-Hydroxy-D-proline	C5H9NO3	131.13	2.26	Organic Acid And Its Derivatives	"2584-71-6"	312400	284400	327500	14060	6114	14160	25450	24020	27800	12470	16230	15370	160500	145100	154200	98210	95750	102100	51260	63010	51690	85300	84420	105700	76370	41230	47840	30220	45040	25470	29490	30160	31520	9351	13540	8548	29760	29260	21450	44910	41010	39690	13310
Com_130_neg	carbamaoyl asparatate			1.07	Amino Acid And Derivatives		115300	61620	128900	243700	183300	207100	168400	161300	88290	45050	85030	83060	134200	126700	145600	43180	82950	53640	67140	63160	76170	114200	94040	94500	30310	47620	60100	306100	263800	231700	235200	266300	249000	59320	71260	78280	297500	305100	343000	462800	427800	415900	153700
Com_131_neg	Ala-trp	C14H17N3O3	275.303	0.9	Amino Acid And Derivatives	"16305-75-2"	212300	194700	225200	45600	31630	42560	68260	51270	64020	43640	27550	29620	100300	74950	88140	92610	96690	112400	107200	93770	85630	79210	76260	88190	120700	72470	98220	80690	66450	60100	47160	46970	31210	33730	26880	26480	51800	48840	45250	51140	69620	60310	34340
Com_132_neg	D-Fructose 6-Phosphate	C6H13O9P	260.136	0.86	Carbohydrates And Its Derivatives	"643-13-0"	41160000	41860000	33490000	24610000	14440000	27750000	19110000	18260000	20240000	13060000	15170000	14550000	14980000	17940000	19890000	15800000	17460000	16830000	35800000	42080000	33720000	17470000	20860000	24170000	16480000	12760000	12240000	30550000	34310000	27920000	14630000	18600000	12670000	9448000	11590000	9536000	38260000	34400000	35240000	19250000	14790000	14340000	8539000
Com_133_neg	deoxyribose-phosphate	C5H7O8P	226.08	0.97	Nucleotide And Its Derivates		182000	225700	162500	293300	246100	303600	132500	130400	169500	97850	96100	96520	73340	97640	92770	60470	54220	47630	280700	292200	342100	85930	91570	93440	46380	62590	61390	186600	239700	186900	94690	100900	98390	95960	57800	67650	233800	224700	231600	130300	97930	134700	81320
Com_134_neg	Citraconic acid	C5H6O4	130.099	1.56	Fatty Acyls	"498-23-7"	2176000	1848000	2355000	6597000	5475000	7048000	7867000	8008000	8626000	8915000	7833000	6549000	1011000	915300	1362000	110300	133900	167000	2964000	4113000	3944000	1273000	1345000	1263000	121800	144000	81500	6315000	8089000	5424000	5098000	7074000	4830000	1065000	1492000	1215000	7510000	6334000	7209000	9937000	6516000	8619000	3522000
Com_135_neg	Spiraeoside	C21H20O12	464.096	6.59	Flavonoids	"20229-56-5"	218500	192200	209200	833400	634900	1057000	29400	374700	191400	231400	179400	153000	42560	43160	23970	10330	9689	5642	62650	72100	70110	22520	26740	77840	11640	9212	8315	87610	76880	61350	41200	63660	19450	10100	12780	9232	76560	90620	76010	52450	49020	70090	14130
Com_136_neg	Saponarin	C27H30O15	594.518	6.27	Flavonoids	"20310-89-8"	3028	9456	6049	2810	1151	2676	11340	1591	3132	722	2664	2989	1134	4971	1065	1130	3513	618	9095	17440	11390	1131	4584	1517	2951	1122	3041	4955	5943	5210	7687	3078	1524	761	388	1127	1810	2669	1140	3016	2667	2628	2182
Com_137_neg	P-Coumaryl Alcohol	C9H10O2	150.174	1.04	Phenylpropanoids and polyketides	"3690-05-9"	16800	11930	13750	13400	10240	13760	7928	11810	9742	9932	11090	7086	9147	8659	7851	18970	15800	18210	17720	8268	14150	11300	6531	9397	15920	9586	17020	8768	13220	21090	7441	9299	6822	13160	12010	9038	15810	12330	15770	17270	6327	11640	11010
Com_138_neg	O-Phospho-L-Tyrosine	C9H12NO6P	261.168	0.94	Amino Acid And Derivatives	"21820-51-9"	43630	55290	43930	34500	26030	37500	42620	26560	45180	31690	37460	30560	34780	25100	37150	38890	27970	25010	36200	34860	44170	22960	31140	23600	27500	24350	26780	25200	24050	21790	23510	25220	32190	44820	42240	37540	19040	20470	27430	22120	25370	16290	22010
Com_139_neg	L-Sorbose	C6H12O6	180.16	0.89	Carbohydrates And Its Derivatives	"87-79-6"	843200	1224000	1111000	1126000	1365000	1240000	369200	265800	177100	163200	206700	125400	1756000	1390000	1099000	1437000	888500	1258000	1480000	1600000	1523000	1104000	1201000	922500	1482000	1473000	741500	1471000	2287000	1669000	667700	548100	942300	697400	494200	739400	3021000	2360000	3594000	717000	822600	1008000	679700
Com_140_neg	Sodium ferulate	C10H9NaO4	216.17	6.81	Cinnamic acids and derivatives	"24276-84-4"	6090	4148	16490	31000	12750	24290	10990	10020	6791	13540	10840	6124	49680	61950	51760	108900	76430	84050	193600	215100	209800	38240	46590	49550	105500	75110	86840	62720	80640	55890	18450	17110	14300	33100	39460	28370	47240	39490	43700	20770	22540	19850	20130
Com_141_neg	O-Phosphorylethanolamine	C2H8NO4P	141.063	0.86	Organic Acid And Its Derivatives	"1071-23-4"	4910000	6436000	2708000	872200	521900	920000	1006000	1132000	1179000	726100	904600	763800	2367000	2838000	3810000	2121000	1683000	1692000	1993000	2564000	2502000	1510000	1280000	1512000	1791000	1521000	1299000	789700	749700	650300	718600	673800	696300	694000	816400	614000	473700	449300	431200	769100	725400	782100	372700
Com_142_neg	Isotrifoliin	C21H20O12	464.096	6.59	Flavonoids	"21637-25-2"	188000	238100	198400	1008000	732000	1012000	42330	393600	181300	211500	183700	147100	56920	40550	34290	12690	6590	10230	54150	107900	69180	17320	36860	72980	9919	7525	10310	83620	78520	81170	29770	64050	16300	5873	10670	5986	79830	104900	68960	57790	41660	82280	21000
Com_143_neg	alpha-D-Galactose 1-phosphate	C6H13O9P	260.136	0.87	Carbohydrates And Its Derivatives	"2255-14-3"	59330000	59350000	57770000	18330000	9766000	18840000	18610000	15850000	19760000	9958000	11520000	11850000	47320000	50190000	52130000	29270000	28680000	23830000	65450000	68850000	72170000	37590000	43440000	44910000	25390000	22000000	22910000	36580000	35830000	35920000	22790000	20450000	19780000	12670000	17060000	14180000	32860000	30830000	33460000	22030000	23020000	21320000	12110000
Com_144_neg	Cytidylic acid	C9H14N3O8P	323.2	0.97	Nucleotide And Its Derivates	"63-37-6"	25850	17480	24930	9665	5837	6900	10930	5095	11400	2084	3936	4521	16680	8954	15330	9285	13760	8146	74380	62670	58580	12090	10820	8810	14920	8980	9994	27670	19030	23080	8045	6194	15360	8712	7072	6611	29320	19640	21090	7205	13530	5499	9226
Com_145_neg	2-Amino-3-hydroxypropionic acid	C3H7NO3	105.09	0.83	Amino Acid And Derivatives	"302-84-1"	1914000	1788000	1876000	3722000	2287000	3725000	2293000	1922000	2345000	1433000	1916000	1628000	2479000	2013000	2045000	2020000	1577000	1658000	2714000	2957000	2610000	1984000	1916000	1927000	1927000	1333000	1927000	5438000	7184000	4837000	2303000	2215000	2363000	1261000	1431000	1482000	4006000	4144000	3593000	2467000	2467000	2462000	1345000
Com_146_neg	Warfarin Sodium	C19H15O4	330.31	5.56	Coumarins and derivatives	"129-06-6"	16270	38560	7278	104200	127900	132700	21000	161000	46070	96700	70100	51140	16660	16980	17301	9093	7583	7243	15914	3601	3205	9433	12794	11412	6561	7478	5727	3155	1614	1230	8287	2010	8030	6680	1462	6183	1500	2724	2985	6207	6264	8947	3262
Com_147_neg	Pyrroloquinoline quinone	C14H6N2O8	330.012	6.17	Quinolines and derivatives	"72909-34-3"	497800	438300	235400	233500	354900	322900	495900	423100	466900	462200	504200	411600	465300	380900	371500	173300	317800	119800	371800	361000	362600	274200	336800	365200	295800	290200	266000	267500	352800	264200	381800	337300	315700	272600	269600	221600	333400	268500	324900	342800	309400	358100	243000
Com_148_neg	13(S)-HOTrE	C18H30O3	294.2	12.07	Fatty Acyls	"87984-82-5"	726800	1132000	382300	28390	15770	28050	51830	32190	63550	28290	71620	56040	306100	382800	381900	69090	48380	39190	899100	1011000	1512000	104800	169900	63290	27860	37310	31150	438300	241500	381300	122200	39910	51440	24780	52670	36070	141400	295900	132600	48210	91780	42310	28970
Com_149_neg	Ligustrazine	C8H12N2	136.197	0.88	Alkaloids and derivatives	"1124-11-4"	76870	63330	81780	128800	127300	116700	82790	79288	59840	73454	71285	67280	69295	54520	65120	80230	59610	72920	103800	119900	130700	52060	63620	87280	67850	61370	96350	100221	117600	92294	80570	102900	80410	80390	82080	77440	152100	109100	169600	106900	134600	112500	84300
Com_150_neg	Echinacoside	C35H46O20	786.73	5.89	Polyphenol	"82854-37-3"	1776	5373	2734	30950	13810	20740	10070	7559	7569	4765	6822	3952	4044	4334	4148	6177	3852	3340	2820	6010	4567	3095	4184	4144	3363	3471	3007	5745	3757	7242	3205	3659	2988	2403	3462	3099	8293	8517	5309	3898	2945	3124	2532
Com_151_neg	Arbutin	C12H16O7	272.25	2.32	Carbohydrates And Its Derivatives	"497-76-7"	743700	748100	678500	83500	44800	76280	175400	198700	181400	179200	203500	155000	100700	139900	211900	15560	29470	37680	378100	455000	323000	152600	208600	218100	28640	42410	28850	144200	135100	101800	157100	171700	159100	45790	33200	44780	147900	147200	140500	316200	302200	287000	127700
Com_152_neg	Esculin	C15H16O9	340.28	5.145	Coumarins and derivatives	"531-75-9"	6701	5302	3167	20850	9143	22420	18790	39080	39720	21850	22040	10350	6620	8615	12500	2475	3412	4620	26240	25010	26870	10960	16470	16720	3639	3638	1827	21940	19580	18260	20270	32430	19150	2346	7409	5708	25190	20730	21330	46110	31490	24300	19450
Com_153_neg	Crocetin	C20H24O4	328.408	8.79	Terpenoids	"27876-94-4"	358700	434500	284000	14760	8391	16090	119200	21750	49830	21840	39800	45820	263600	275700	323100	98400	59340	72860	701800	873300	1094000	178900	138000	138300	62730	79260	63050	453000	411300	396200	316400	230600	355000	70110	110700	80280	357500	390900	273800	416300	471100	386100	146500
Com_154_neg	5-hydroxyhexanoic acid	C6H12O3	132.079	7.21	Organic Acid And Its Derivatives	"185956-02-9"	93330	95010	61830	121400	63510	135000	53530	63810	70700	51840	57790	51120	84180	68020	87260	51850	44840	54990	259700	281500	266800	97240	93240	121100	60080	61910	58330	178100	190700	189500	109900	98930	113900	59520	53420	52690	125400	145800	111000	144600	140400	120000	61070
Com_155_neg	Isoguanosine	C10H13N5O5	283.241	2.324	Alkaloids and derivatives	"1818-71-9"	1440000	1346000	1532000	6391	110400	8023	46840	237000	564300	232900	308700	25790	1008000	718300	850000	8186	137600	133200	2811000	3282000	3500000	919000	1058000	1048000	16580	187500	156400	1683000	1622000	74660	946000	976400	1157000	20070	76710	194600	1261000	1299000	1531000	928400	1024000	1328000	562600
Com_156_neg	5'-Adenylic acid	C10H14N5O7P	347.221	1.036	Pentose phosphates	"61-19-8"	248400	198500	168400	149300	84040	180800	30270	49250	46650	29110	46600	21300	6191	17350	12760	2033	2663	33113	219800	363700	353500	11130	17310	18960	3829	853	2700	118100	109900	158200	8955	12930	7807	28229	2965	909	233100	284200	284200	3744	7012	8634	2114
Com_157_neg	alpha,alpha-Trehalose	C12H22O11	342.296	0.962	Carbohydrates And Its Derivatives	"99-20-7"	1645000	2466000	1263000	4684000	5766000	3594000	1433000	3123000	2579000	1833000	1452000	1925000	777100	703400	717200	565500	544800	603800	1049000	1064000	875100	671300	671500	741300	565800	582100	600100	747100	1128000	1355000	662200	690000	686600	583400	669700	643500	2643000	3282000	4157000	951800	942000	996600	1019000
Com_158_neg	Methylmalonate	C4H6O4	118.09	1.938	Organic Acid And Its Derivatives	"516-05-2"	10600000	10750000	9990000	6835000	3566000	7130000	4212000	4354000	4614000	3475000	4525000	3612000	12530000	12320000	12330000	8318000	9190000	8845000	9341000	9905000	9713000	12640000	13910000	14920000	11870000	11460000	10700000	8102000	7544000	7358000	34730000	34880000	34450000	31600000	38800000	34230000	7228000	7687000	7117000	25140000	22920000	19670000	41710000
Com_159_neg	Carvacrol	C10H14O	150.22	1.467	Terpenoids	"499-75-2"	10520	14970	8252	831	7061	3898	2896	7627	1118	7808	2249	6809	14760	10170	9425	20850	14840	25820	4218	7241	7205	8842	7460	9941	16950	9337	27030	6374	11950	2262	7382	9934	5129	13650	11660	14820	885	7151	6058	911	7077	8645	4065
Com_160_neg	D-2-Hydroxypentanedioic acid	C5H6Na2O5	192.078	1.49	Amino Acid And Derivatives	"103404-90-6"	2403000	2231000	2316000	6856000	5607000	11020000	11630000	11950000	8761000	9333000	10490000	9833000	1129000	1126000	1163000	127600	165600	157500	3662000	4360000	4045000	1262000	1489000	1419000	157200	158300	151400	8835000	8032000	8491000	7044000	7378000	5034000	1113000	1338000	1274000	7715000	7979000	6881000	10290000	6551000	8981000	5215000
Com_161_neg	D-3-Phosphoglyceric acid	C3H5H2O7P	230.021	0.95	Sugar Acids And Its Derivatives	"80731-10-8"	199300	274000	122400	153500	138900	180000	177900	309700	264800	187600	199800	134300	116400	129200	125000	146100	79020	119500	214000	196200	234800	116700	157300	120900	98650	142200	190600	99850	114100	135300	138500	109600	117100	124700	106900	119900	125800	105900	138400	127200	106100	110000	105400
Com_162_neg	D-Mannose 6-phosphate	C6H13O9P	260.136	0.87	Carbohydrates And Its Derivatives	"723729-16-6"	13450000	12260000	10200000	7827000	4068000	8132000	5578000	5481000	5817000	3510000	4001000	3946000	3555000	4869000	5261000	4035000	4215000	4677000	10410000	12530000	11460000	4697000	5768000	6831000	3881000	3392000	3359000	9522000	10100000	9024000	3908000	4783000	3271000	2234000	2549000	2263000	10180000	10820000	10660000	5039000	3835000	4418000	2168000
Com_163_neg	2–furanoic acid	C5H4O3	112.084	1.49	Organic Acid And Its Derivatives	"88-14-2"	5303000	4763000	5474000	22910000	12500000	23540000	26210000	27340000	29350000	20460000	24850000	21870000	2498000	2211000	2670000	235100	264800	299100	8103000	9395000	8881000	2740000	3210000	2856000	271200	218300	150300	20190000	18170000	18160000	15890000	16310000	15730000	2252000	2832000	2427000	17610000	17400000	16020000	22850000	21520000	19230000	11540000
Com_164_neg	Lactose	C12H22O11	342.3	0.911	Carbohydrates And Its Derivatives	"63-42-3"	124700	183400	129600	314700	434900	348100	117900	200500	171900	141700	139700	148900	71060	56830	61410	62890	55640	47090	119100	111200	113900	71060	70700	70760	54120	49670	47660	123800	145800	143200	54070	76570	66990	56230	65270	65210	245400	314100	421400	97610	100900	85010	106400
Com_165_neg	alpha-D-Glucose	C6H12O6	180.16	0.912	Carbohydrates And Its Derivatives	"492-62-6"	1055000	1733000	1526000	2819000	1331000	2123000	501800	299000	427000	144700	181800	315100	2045000	1496000	1585000	2714000	1710000	1367000	2960000	3055000	2812000	1706000	1484000	1647000	1217000	1158000	1230000	3096000	2593000	3138000	750400	1054000	848900	804300	831900	1014000	3091000	5538000	4094000	1195000	1527000	1119000	1178000
Com_166_neg	L-Arabinitol	C5H12O5	152.15	0.925	Sugar Alcohols	"7643-75-6"	8502	8519	7427	39800	26280	39820	13870	15670	16310	12760	14440	15740	10560	10740	7640	14870	9684	9519	24230	23550	21910	12080	10270	9050	6462	6783	7811	42740	36750	39210	16880	15250	20420	15080	12340	13880	52910	55810	46620	23090	29400	29570	23840
Com_167_neg	L-Pyroglutamic acid	C5H7NO3	129.11	1.689	Amino Acid And Derivatives	"98-79-3"	201300	173700	185500	14590	10850	21910	35910	22300	26700	19610	21330	14760	220400	97070	91350	172500	69600	88190	30680	26530	38920	55560	55570	72990	164000	52620	166700	45210	429400	34180	56800	61650	38420	39370	46940	66080	29630	30680	29700	43310	40840	42730	31240
Com_168_neg	Lactobionic acid	C12H22O12	358.3	0.91	Carbohydrates And Its Derivatives	"96-82-2"	154600	147200	155800	33020	23220	35520	79920	69240	66180	140200	128800	135400	87240	89630	81120	98360	73280	77970	93880	94670	83020	59570	61760	68400	77370	88170	80140	55570	60960	73480	60530	72190	69690	85810	97990	74260	57900	48300	45520	72940	72160	67460	107100
Com_169_neg	Citric acid	C6H8O7	192.12	1.516	Tca Cycle	"77-92-9"	71340000	59440000	69900000	194700000	167200000	203000000	241900000	217200000	239900000	272500000	227800000	199500000	36480000	32100000	37390000	2094000	2643000	3595000	94780000	128500000	131100000	34980000	42010000	42820000	3641000	3098000	2073000	201900000	251400000	153100000	163000000	214300000	153000000	33820000	33750000	38810000	225600000	180600000	214700000	205800000	197900000	256600000	122800000
Com_171_neg	cis-Aconitic acid	C6H6O6	174.11	1.766	Tca Cycle	"585-84-2"	392800	416200	436100	1323000	549500	1354000	729600	696100	844000	548400	633700	620500	252900	255900	265000	102200	103400	104300	366600	430000	467100	245100	319400	368800	110000	125600	128400	2397000	2445000	2021000	1478000	1556000	1831000	508800	654300	604800	2180000	2559000	2181000	1730000	1962000	1214000	1609000
Com_172_neg	CDP	C9H15N3O11P2	403.176	0.99	Nucleotide And Its Derivates	"63-38-7"	54170	60550	73640	25640	16150	25760	56770	62270	60650	58620	54140	49870	50470	38100	44460	31230	25330	26750	34750	36390	45330	36140	40690	37740	25260	24060	21900	31690	37550	23760	42460	46780	30570	16570	21000	16960	19050	23030	13620	47620	51520	37020	26840
Com_173_neg	Thymidine 5'-diphosphate	C10H16N2O11P2	402.19	0.69	Nucleotide And Its Derivates		151400	125300	159000	61910	41790	57390	137600	157600	121500	96630	133300	97260	103500	91780	101500	52290	46230	52700	86990	97240	78390	84450	96190	87070	51210	43920	47260	78710	78700	73870	81250	95020	70470	43700	40180	30170	48140	34500	32090	103900	113200	96880	58260
Com_174_neg	N-Oleoyl Glycine	C20H37NO3	339.513	14.62	Organic Acid And Its Derivatives	"2601-90-3"	2143	1670	2753	1659	2903	2399	1898	1979	2720	2163	2485	2005	10920	3076	2388	6226	2289	2277	2366	2623	2109	3757	1589	2670	6737	2985	7232	2700	6375	3155	4139	4052	1974	3306	3019	5029	2377	2482	2032	2676	2387	2046	2557
Com_175_neg	N-Acetylphenylalanine	C11H13NO3	207.226	6.82	Amino Acid And Derivatives	"2018-61-3"	96810	95160	112200	54770	26580	52490	47130	45680	61130	22670	28440	30580	64020	61190	52370	26200	38240	39740	77340	86160	80400	52700	48750	55460	23120	22310	19230	57240	58310	59890	45890	31870	42230	20380	13470	13480	60290	58930	49740	52370	58060	53510	25770
Com_176_neg	N-Acetyl-D-glucosamine 6-phosphate	C8H16NO9P	301.188	1.81	Carbohydrates And Its Derivatives		569000	466900	505800	6039	8164	10590	21840	27530	27070	10740	11160	8520	289500	244500	275800	130200	160300	162100	64100	113600	74110	178400	217300	300300	137700	102400	109300	58070	88790	35590	40850	41810	32220	15560	17310	19620	28680	27020	28390	48390	45190	48510	21770
Com_177_neg	D-Ribose 5-phosphate	C5H11O8P	230.11	0.89	Pentose phosphates	"3615-55-2"	1221000	1130000	1246000	489800	300200	463900	480800	494700	508900	326500	357600	340400	999100	1031000	972400	878500	915500	869000	1388000	1476000	1590000	710800	701900	901100	888000	861900	838900	969000	942500	899300	614000	641400	610600	545700	677200	599200	746900	849500	770400	719300	698300	656100	561900
Com_178_neg	Trifolin	C21H20O11	448.101	6.62	Flavonoids	"23627-87-4"	28360	24020	22440	12110	11540	30720	6359	23450	15610	5772	7644	4675	6211	3307	5863	6089	859	3974	4232	7699	7963	4340	4765	4868	1657	3468	1636	5863	4512	6729	1305	5059	5960	373	1394	3599	5630	4914	4901	8388	5668	6383	1706
Com_179_neg	Uridine 5'-monophosphate	C9H13N2O9P	324.18	1.037	Nucleotide And Its Derivates	"58-97-9"	2022000	1664000	1390000	1418000	294700	1119000	836000	932800	1318000	439100	530100	431600	172300	228600	133700	80240	65440	97520	2189000	3098000	2979000	122100	168500	168400	51170	55610	65170	1216000	1012000	1199000	69470	133900	94740	28190	42200	282265	1014000	1298000	1587000	99150	87140	113500	48060
Com_180_neg	Sibiricose A5	C22H30O14	518.465	5.421	Phenylpropanoids	"107912-97-0"	5008	4173	2967	2896	1183	1482	1185	7402	3603	10470	8083	5731	7541	6856	9263	2359	3239	3991	3905	1955	3160	7079	4818	4352	4438	3161	3548	4978	4193	1091	3597	5366	1994	10690	11300	7866	1179	1748	2691	2693	6578	4136	8267
Com_181_neg	D-Glucopyranose	C6H12O6	180.156	0.87	Carbohydrates And Its Derivatives	"28905-12-6"	462600	433700	489200	872100	676200	754400	212100	167400	191800	215800	214100	213700	919900	559300	441800	551800	436500	547400	811400	807900	894200	719800	409900	510100	364300	620300	364200	1355000	915900	940600	318800	419700	363500	288700	343200	266700	879300	1788000	1367000	656900	452600	460000	493900
Com_182_neg	D-Histidine	C6H9N3O2	155.155	0.81	Amino Acid And Derivatives	"351-50-8"	2313000	2385000	2374000	29690	36920	38710	65160	108700	81530	44410	40190	39510	1263000	1104000	1191000	638800	523100	585400	361000	411700	331600	627500	617300	712000	423400	337500	412300	92550	380600	96680	123900	101600	113200	51900	46350	56130	93350	117800	113000	108100	128800	91450	57490
Com_183_neg	D-Glucarate	C6H10O8	210.139	0.82	Carbohydrates And Its Derivatives	"87-73-0"	2917000	3706000	2649000	6242000	2977000	6679000	10620000	10230000	12370000	5111000	7835000	6397000	5375000	5819000	5697000	2675000	2973000	2637000	23190000	23620000	22920000	6611000	7058000	6646000	3551000	3493000	2554000	45480000	42390000	48940000	21800000	24580000	23310000	7545000	8421000	6277000	47490000	46890000	46750000	42330000	45890000	42850000	21010000
Com_184_neg	D-Gluconic acid	C6H12O7	196.155	0.91	Carbohydrates And Its Derivatives	"526-95-4"	2285000	2156000	2375000	6209000	3402000	6228000	2912000	3046000	3066000	1279000	1676000	1490000	2753000	2493000	2277000	2367000	1982000	2724000	5128000	4911000	5221000	1758000	1995000	2297000	1893000	1601000	1489000	6816000	6537000	6251000	3085000	3549000	3113000	1462000	1798000	1650000	9585000	11490000	10240000	5547000	5351000	4695000	2121000
Com_185_neg	Aspartate	C4H7NO4	133.103	0.85	Amino Acid And Derivatives	"617-45-8"	33570000	32720000	32260000	44220000	25690000	44890000	20370000	23170000	23440000	14490000	17740000	14720000	27010000	23230000	25510000	17560000	16700000	19290000	35500000	40820000	41440000	17400000	19200000	23920000	16610000	14030000	13920000	63750000	60960000	54840000	22200000	24660000	22420000	9202000	10830000	9576000	61470000	57220000	55020000	30160000	28030000	25950000	14640000
Com_186_neg	Dl-Glutamic acid	C5H9NO4	147.129	0.87	Amino Acid And Derivatives	"617-65-2"	40670000	35570000	37730000	41210000	26690000	39790000	16540000	19000000	18590000	13890000	15620000	15050000	23900000	24860000	24420000	18640000	17870000	20040000	32500000	34150000	35920000	19380000	22980000	27950000	15290000	14080000	13660000	29850000	28840000	28700000	16490000	19550000	14380000	10890000	11950000	11360000	30550000	31130000	30550000	18450000	14810000	16980000	11710000
Com_187_neg	Dihydroxyacetone phosphate	C3H7O6P	170.058	0.9	Carbohydrates And Its Derivatives	"57-04-5"	294900	350800	212400	288400	280800	332300	227600	223500	226300	210100	172000	215400	127300	164100	172500	157400	135800	129300	438000	438800	435300	161800	224400	209700	155400	154000	157900	258700	278500	264100	148200	170100	156800	159500	159700	172000	266700	283700	323900	140900	148300	137500	164400
Com_188_neg	D-Lactic acid	C3H6O3	90.08	1.44	Organic Acid And Its Derivatives	"10326-41-7"	47710	43570	41130	5540	6213	5889	14250	18889	8970	14710	10380	6849	73080	35430	42800	77860	31620	54810	12840	15400	9223	30410	26120	28550	100900	43680	84980	13650	79160	5957	21670	53250	25550	45210	44330	49940	7730	5759	17369	15960	14960	17960	18890
Com_189_neg	DL-o-Tyrosine	C9H11NO3	181.189	1.81	Amino Acid And Derivatives	"2370-61-8"	6607000	6041000	6169000	143000	89940	135400	250700	407400	313300	123500	155800	144300	2991000	2561000	3206000	1546000	1796000	1811000	685000	843500	735900	2111000	2522000	3264000	1267000	1065000	1223000	445000	1049000	412500	584800	510000	479400	192000	208000	257100	406900	366600	364400	641100	684000	486500	278300
Com_190_neg	alpha-Amino-beta-(3-indolyl)-propionic acid	C11H12N2O2	204.225	4.91	Amino Acid And Derivatives	"54-12-6"	4828000	4490000	4805000	134800	89010	128900	566600	696000	573500	200500	175500	210300	1127000	1041000	1059000	1368000	1370000	1552000	246300	350300	371200	984700	1201000	1446000	1514000	1277000	1214000	243600	511300	215300	273400	247600	229000	257000	292400	229700	212100	200700	187400	258300	292000	207800	83940
Com_191_neg	Cryptochlorogenic acid	C16H18O9	354.309	5.443	Alcohols and polyols	"905-99-7"	248600	357600	124200	2406000	3224000	2841000	227000	3143000	685900	1815000	1074000	688900	4375	6381	6230	8942	3237	2866	8365	13380	6227	11950	10280	16980	8278	1451	5887	7595	9462	5130	13900	30070	21750	5500	4597	5321	15400	9494	11950	37960	29540	42320	14080
Com_192_neg	D-Fructose-1,6-biphosphate	C6H14O12P2	339.996	0.91	Carbohydrates And Its Derivatives	"38099-82-0"	215300	194600	215600	28570	11440	32080	150100	120900	155500	70360	92090	58010	223500	221200	186300	115400	130600	129900	257800	334300	272900	151200	140600	222500	134400	120500	99710	238400	240900	178700	180300	135600	156300	70060	107300	85230	96390	79980	76530	233900	197500	142300	54550
Com_193_neg	2,3-Dihydroxybenzoic acid	C7H6O4	154.027	6.21	Benzoic acids and derivatives	"303-38-8"	4654000	5016000	5411000	141000	103900	145900	154500	206100	140000	114400	136600	140200	923500	875500	779500	606498	18790	592818	965800	1262000	1310000	201100	364700	381200	33370	390671	45080	494200	613500	484700	386100	345000	356700	65790	98150	68190	425000	478800	433000	503700	478400	468000	171500
Com_194_neg	Aminomalonic acid	C3H5NO4	119.022	0.88	Amino Acid And Derivatives	"1068-84-4"	1257000	1211000	1307000	904900	664600	863900	580200	520700	547200	360200	347800	325000	1379000	1170000	1288000	1062000	1050000	965200	1404000	1417000	1351000	1090000	1024000	1145000	1028000	906900	946600	1852000	2057000	1875000	849400	785700	835700	423500	368100	458800	1632000	1802000	1780000	947400	928700	876700	447800
Com_195_neg	Methylophiopogonanone A	C19H18O6	342.343	0.78	Flavonoids	"74805-92-8"	180800	169000	190300	21140	15130	17330	13230	13750	11360	11130	8739	8740	89910	94820	110100	26960	40970	49820	148200	147900	138900	49020	44980	60880	13140	17470	16640	62040	49740	58260	25280	15000	17220	6343	9872	11070	70200	87180	77330	33380	40000	35110	3795
Com_196_neg	3-Hydroxy-3-methyl butyric acid	C5H10O3	118.063	0.97	Organic Acid And Its Derivatives	"625-08-1"	13810	13730	15720	30900	30060	42850	14170	8284	9843	14847	7166	6129	16320	18600	18480	22900	12090	8404	29380	36300	38750	16570	14890	22220	11020	13100	20280	33160	29570	36970	15390	10280	18750	10060	12520	12530	40700	61540	45130	17320	21910	24110	14750
Com_197_neg	Quercetin	C15H10O7	302.236	8.96	Flavones and Flavonols	"117-39-5"	3820	2590	5022	1651	3541	1232	1695	977	1465	1333	5730	4380	17240	11370	9729	3385	1746	2312	18020	27600	22170	9697	7584	7412	5354	2397	6843	10730	8060	5463	5301	6439	5182	3410	5625	5484	4850	3244	5802	6290	6631	5000	1102
Com_198_neg	Quercetin-3'-O-glucoside	C21H20O12	464.382	6.53	Flavones and Flavonols		163300	172300	133100	702300	635100	771100	18290	288800	124500	197800	142500	114400	31250	35630	17130	6527	5719	10970	47700	56580	63960	12250	18860	48590	3503	7455	3503	59380	74050	69820	24470	42500	15780	4834	4384	8305	94090	70780	43030	42710	27590	55410	13610
Com_199_neg	Cellotriose	C18H32O16	504.437	1.02	Carbohydrates And Its Derivatives	"33404-34-1"	19440	14870	22430	15300	13330	15980	10860	8621	10380	10180	5622	10450	7216	9777	11130	4196	7554	4979	36280	37010	30430	6787	8475	7344	8242	7530	13920	23170	18320	27910	11920	10170	12620	10790	4407	6158	14150	22370	26520	11760	7947	9777	9469
Com_200_neg	Syringic acid O-glucoside		360.1	4.82	Flavonoids		35110	29300	27710	15030	8075	14820	24830	29440	31820	21050	30600	29660	9297	13840	13390	7088	4311	9241	20830	21460	22780	11440	12400	20760	5723	5019	7067	13390	10100	8320	28530	24450	25150	7701	8595	8862	16260	14750	15690	52630	52890	41160	26710
Com_201_neg	Di-O-methylquercetin	C17H14O7	330.1	9.19	Flavonoids		31980000	49340000	24190000	343900	139800	288600	2777000	442500	1366000	461900	1112000	1071000	20640000	23430000	28210000	10970000	7396000	7993000	25100000	33800000	37520000	14820000	11790000	11490000	8100000	8136000	8474000	10090000	9412000	9123000	15470000	11270000	17450000	6650000	8306000	5930000	6729000	7798000	5224000	14040000	17940000	12700000	7999000
Com_202_neg	Salicylic acid O-glucoside	C13H16O8	300.1	4.14	Phytohormones	"10366-91-3"	2985000	2781000	2945000	1853000	948300	2000000	2714000	2924000	3053000	2303000	2730000	2324000	990400	1124000	1113000	585700	576900	639500	2521000	2744000	2564000	943200	957100	1071000	642000	558600	509400	1525000	1546000	1300000	1423000	1326000	1475000	618700	717700	582200	1646000	1524000	1427000	2496000	2425000	2232000	1214000
Com_203_neg	3,4,5-Trimethoxycinnamic acid	C12H14O5	238.24	18.465	Organic Acid And Its Derivatives	"90-50-6"	6906	7820	4356	2455	3390	5454	4243	3070	3416	7340	4775	4063	4775	3313	7963	5872	3042	4707	2858	4473	4216	3470	5681	5586	2787	4013	4686	4127	7164	2705	3496	2696	4491	1848	2816	4007	4295	1484	4321	3265	2517	4565	2198
Com_204_neg	Raffinose	C18H32O16	504.437	1.009	Carbohydrates And Its Derivatives	"512-69-6"	42610	28340	39840	17730	10690	20250	9079	15330	11100	18600	12100	15620	19330	24790	29370	34220	23080	16040	31860	32100	36880	18180	18710	16490	16030	12760	14210	20330	28580	32240	11110	7418	6562	15280	15990	12770	26540	38140	21950	16090	23140	14850	17310
Com_205_neg	p-Coumaric Acid	C9H8O3	164.16	6.549	Cinnamic acids and derivatives	"501-98-4"	202500	114400	253400	56810	32680	61200	47720	41080	40560	22180	32940	34160	32290	57470	67120	53119	49737	56821	312100	476500	374400	41880	98460	125100	49364	53115	49228	230700	184000	204600	52490	59830	59660	60723	53039	54241	225900	243900	191800	92700	70770	103200	37730
Com_206_neg	Hyperoside	C21H20O12	464.38	6.554	Flavones and Flavonols	"482-36-0"	95350	84140	71260	333700	324500	452000	12590	186500	79750	95450	107800	91630	16310	28130	12180	4523	2636	1756	19180	38300	30530	9085	10860	25890	3569	2190	2223	31150	49370	24830	12360	22060	8872	4521	2450	5368	45840	34810	22670	29070	16410	25670	5236
Com_207_neg	Vanillic acid	C8H8O4	168.15	5.901	Organic Acid And Its Derivatives	"121-34-6"	2562	5388	3212	7608	2674	4408	15520	16570	13320	7929	8430	6932	12650	10960	12150	4530	4368	2833	15660	16760	19680	4898	4831	9537	3920	4449	3409	5442	10780	8781	7739	4902	6929	4935	4592	4551	6818	10330	6910	4344	8345	4152	3601
Com_208_neg	D-Glucose	C6H12O6	180.156	0.94	Carbohydrates And Its Derivatives	"50-99-7"	669600	735900	883600	981500	694300	1054000	210400	170700	138400	178500	193400	153600	708500	555200	643100	483500	431400	363000	880400	1294000	834200	561900	411500	389300	615000	373100	485700	914100	1078000	710100	486000	460700	338900	310100	250300	228000	904100	1125000	1818000	714300	406800	500700	404900
Com_209_neg	Naringenin	C15H12O5	272.25	8.683	Flavanones	"480-41-1"	102900	76120	147600	7991	8035	12590	20980	9256	8053	5557	4213	5390	27940	25070	25370	8340	8778	3443	23690	36290	29310	67710	55780	64530	6745	4949	7773	30230	35500	23960	98590	91030	100200	19680	24440	26010	20410	20450	15650	45070	47240	42160	27030
Com_210_neg	Lathyrol	C20H30O4	334.45	11.17	Terpenoids	"34420-19-4"	52010	90080	30230	2764	3366	10678	3152	10417	4092	8717	5260	1925	27700	33140	36120	11310	12010	9412	18070	27800	44960	8668	12900	13860	8078	9047	10190	5008	2666	4349	8686	7926	3503	3608	5052	3010	3897	8044	2117	2143	6899	4160	1878
Com_211_neg	Lonicerin	C27H30O15	594.526	6.73	Flavonoids	"20633-84-5"	1241000	1055000	1097000	13590000	11850000	17410000	2455000	4868000	3495000	2797000	2949000	2086000	8833	22810	18110	9744	19930	7323	33050	41500	33500	11020	12360	19010	3973	5492	3091	387800	394300	359500	32250	47280	35790	3981	5735	6641	931500	983300	734500	70240	80520	77970	18090
Com_212_neg	Hexadecanedioic acid	C16H30O4	286.41	11.908	Fatty Acyls	"505-54-4"	44800	44880	41370	41010	42450	42940	54520	42570	61390	52300	58010	48980	66590	60930	51580	66350	53850	51690	51360	53890	55410	54800	62490	56510	78370	60490	61800	66540	59680	61050	63850	69460	57090	58470	65330	67990	62240	68140	72800	62080	65300	72500	71820
Com_213_neg	1,11-Undecanedicarboxylic acid	C13H24O4	244.33	10.093	Organic Acid And Its Derivatives	"505-52-2"	809200	823400	805500	784000	833600	760000	831400	809000	827300	825300	791300	876800	918800	810000	783300	853900	857400	841300	818000	808500	824500	781200	817500	758200	1195000	881300	858400	811000	821300	834700	804700	873500	863200	956100	887100	1037000	826600	850300	868100	871000	850500	881400	844500
Com_214_neg	beta-L-Arabinose	C5H10O5	150.13	0.9	Carbohydrates And Its Derivatives	"5328-37-0"	35860	42820	52920	61150	57020	67540	12260	9544	8126	9301	16240	5185	60270	51010	32520	37530	47600	46670	43770	53310	77250	40400	25090	57710	65380	50280	27640	72690	86400	72260	25560	31240	37520	28040	24730	19990	129100	91100	201800	33320	29740	45850	36170
Com_215_neg	Hordatine B	C29H40N8O5	580.1	6.94	Benzene and substituted derivatives	"10502-21-3"	48280	90370	31170	13662	9834	14154	21310	27050	46290	10630	19500	7536	32350	27050	19930	4417	7513	14200	4720	4628	1883	8359	24410	44370	4862	4758	5778	10755	10802	13586	8861	10600	22690	6197	5320	7534	10878	2644	12268	11960	13070	17650	6635
Com_216_neg	Isovitexin	C21H20O10	432.378	6.533	Flavones and Flavonols	"29702-25-8"	124600	166000	164900	23790	19600	32490	72190	77330	108700	31520	32320	36320	39530	51160	56720	8513	4709	16930	98290	130400	103900	31380	34070	36600	7663	9379	14050	46980	63350	44280	35370	37180	23570	9386	6809	4943	29500	28040	19580	42210	22280	27250	4668
Com_217_neg	2'-Deoxyguanosine	C10H13N5O4	267.241	3.181	Nucleotide And Its Derivates	"961-07-9"	38850	29760	44030	4478	3045	3771	15630	6770	15750	4070	5711	5851	33020	32700	35440	9156	7896	7894	25850	37710	32730	21220	17840	21570	28210	6474	7210	57660	47360	39330	35160	28040	22650	10480	11760	8836	47510	44190	35010	39430	37790	28170	16970
Com_218_neg	Embelin	C17H26O4	294.39	12.632	Quinones	"550-24-3"	6417	5422	4590	539	834	374	656	1474	441	2729	1025	579	5836	8132	7546	2604	2446	937	5342	6715	7233	4370	3519	3006	3017	1222	2212	398	1964	414	2002	1706	3112	2037	516	2768	1151	1078	520	677	1481	670	870
Com_219_neg	(-)-Jasmonoyl-L-isoleucine	C18H29NO4	323.21	9.94	Phytohormones	"120330-93-0"	17710	19370	18300	9297	8400	13936	4031	4505	12070	3250	12710	4033	6055	1086	6721	6719	6525	10017	4186	5887	6212	11640	4822	8978	3549	1855	7934	17640	17710	10180	16130	13640	20640	7896	8990	6185	12930	5901	7125	6341	16250	18460	6669
Com_220_neg	Methyl salicylate-2-O-glucoside	C14H18O8	314.1	4.8	Phenolic acids	"10019-60-0"	23590	18960	21940	17190	11370	14410	21470	25300	32390	19450	21100	18240	10910	8946	8537	6455	4473	7577	16580	18210	22310	7535	11070	12760	10110	4859	6558	15200	14570	12290	14410	11590	11800	8477	9724	6631	15840	10050	21020	18620	20530	13630	8092
Com_221_neg	9,10-EODE	C18H32O3	296	1.69	Fatty Acyls		14170	17620	39920	79560	39610	22670	88520	59530	69100	56650	75590	67460	25010	5387	23180	4274	19905	21682	20680	46300	33980	10080	24290	16060	3913	4182	4007	80570	78980	30690	56370	51030	26430	13530	18990	13950	60430	47020	37290	57300	58320	57430	25200
Com_222_neg	Maslinic acid	C30H48O4	472.7	13.077	Terpenoids	"4373-41-5"	47770	82660	72710	8148	14340	28905	17476	4274	21869	9223	10560	16650	161200	152100	124300	60840	62780	43340	66610	84430	58740	145700	142900	120900	39520	72080	72580	29168	47940	18340	65920	35310	63830	40290	28200	37580	6171	39983	31057	25930	27268	10590	16408
Com_223_neg	Trilobatin	C21H24O10	436.409	7.523	Chalcones and dihydrochalcones	"4192-90-9"	37300	42800	24760	3830	3885	5859	7969	60270	38400	46740	34520	34960	10923	9258	10667	8627	8960	10478	4798	4220	1916	9185	7781	2333	9424	9097	9374	3893	9325	7408	2987	5400	8970	7877	9609	7195	2714	2760	2847	10520	8177	9887	7206
Com_224_neg	Nystose	C24H42O21	666.578	1.03	Carbohydrates And Its Derivatives	"13133-07-8"	4714	10330	7362	1052	2076	1680	6329	3529	6967	5386	5711	4898	3261	1932	5179	1220	4888	750	5272	3150	2825	4913	1996	829	1229	4897	4928	5113	3599	5766	4104	412	6410	3349	4463	4558	1782	1060	4639	6506	1151	3398	2848
Com_226_neg	4-Hydroxyisoleucine	C6H13NO3	147.172	1.038	Amino Acid And Derivatives	"781658-23-9"	46050000	44050000	44430000	44890000	30410000	48030000	19300000	22410000	20940000	16790000	17350000	15480000	28430000	28090000	28690000	19820000	21310000	23280000	38480000	39350000	37530000	22360000	27650000	30190000	18030000	15750000	15380000	30860000	32280000	30840000	17040000	19770000	16840000	12230000	13260000	11940000	31700000	33960000	33170000	19540000	16890000	18340000	12420000
Com_227_neg	Pyridoxal 5-phosphate monohydrate	C8H12NO7P	265.16	1.7	Pyridines and derivatives	"41468-25-1"	90640	95030	83010	135500	74870	130800	85770	69530	90830	35630	47180	51790	11420	21060	27170	12360	10810	15270	151600	132800	131700	21130	37780	34070	12260	8787	10930	157300	139200	153400	36780	47330	26960	9473	13810	15240	145900	145100	138900	52520	47560	45730	17970
Com_228_neg	L-Cycloserine	C3H6N2O2	102.09	0.8	Amino Acid And Derivatives	"339-72-0"	6062	4092	8654	334	5634	761	426	2476	1597	1631	475	818	4137	4931	5882	2045	4147	3682	4492	8213	9185	4871	1882	2114	3259	807	1292	1526	7849	8200	4858	2852	2736	1208	2048	2282	13560	9127	5909	4493	6133	5747	2879
Com_229_neg	D-Galactose	C6H12O6	180.16	0.9	Carbohydrates And Its Derivatives	"59-23-4"	827800	779300	900300	1432000	913200	1094000	414100	342100	342200	335900	310600	318100	881200	1021000	905300	1146000	1100000	754900	2085000	1315000	1306000	682200	566700	714800	1511000	490000	761400	1624000	1201000	1205000	653900	766000	478900	430000	683100	742400	1940000	1641000	1734000	1632000	936000	851100	803100
Com_230_neg	Coniferin	C16H22O8	342.132	0.97	Carbohydrates And Its Derivatives	"531-29-3"	3877000	5193000	3439000	995500	839200	1004000	3245000	2737000	2849000	3452000	4095000	3749000	3249000	2584000	3142000	1933000	1975000	2106000	2077000	2000000	1521000	2500000	2680000	2135000	2181000	2415000	1990000	1367000	1466000	1280000	2413000	2411000	2607000	2198000	2585000	2506000	1960000	1665000	1659000	3196000	3965000	3522000	2515000
Com_231_neg	D(+)-Melezitose O-rhamnoside	C24H42O20	650.1	1.05	Carbohydrates And Its Derivatives		34660	20120	34190	8677	8160	8086	3973	6135	4329	8292	2858	2105	12020	13250	7999	14470	17310	17150	6556	9598	3199	10760	17150	13090	21500	11930	18350	3574	7634	4049	8181	4452	6594	1617	8592	8808	7506	9101	8856	14250	12580	10220	6684
Com_232_neg	D-Ribose	C5H10O5	150.13	0.92	Carbohydrates And Its Derivatives	"50-69-1"	26510	29410	42600	90650	45260	56390	6887	8904	6678	7688	5506	7953	31630	41530	26040	56510	37030	39900	44630	56310	53000	30700	16170	35310	47040	20840	23020	45210	55720	50490	21870	29930	13810	13000	27010	18070	93150	70520	109600	48930	32020	30770	35000
Com_233_neg	Pinobanksin	C15H12O5	272.069	7.06	Flavonoids	"548-82-3"	16830	29160	7866	15030	9688	13810	4471	7672	10710	9730	5656	1744	6066	4167	1970	6252	4765	2946	1704	1488	5033	4302	4673	3204	3666	2299	1507	3447	1137	3822	5424	5760	3412	2784	2984	3098	3445	1955	6118	3981	2649	4874	2577
Com_234_neg	Afzelechin	C15H14O5	274.084	0.68	Flavonoids	"2545-00-8"	906600	934300	910400	600500	368500	596100	848000	875700	917700	747400	816600	863000	696700	691000	670900	467300	468000	531400	726600	798100	675900	715700	624600	742200	465800	382300	461800	669700	524800	535400	725500	679300	715500	427700	455300	399600	523500	510600	477100	877000	934900	860200	511900
Com_235_neg	GA7-1			9.22	Phytohormones		41750000	64630000	32000000	444200	167700	364100	3603000	545100	1735000	559300	1336000	1410000	26700000	28790000	36160000	13800000	9741000	10200000	31760000	41560000	49170000	18760000	15000000	15190000	10230000	10430000	10710000	12220000	11660000	11200000	19430000	13230000	22120000	8605000	10440000	7579000	8498000	9902000	6139000	18720000	22670000	16550000	10170000
Com_236_neg	D-Xylose	C5H10O5	150.131	1.01	Carbohydrates And Its Derivatives	"58-86-6"	42190	39060	38560	40910	21190	24330	16370	15350	11390	12880	12980	13220	23580	27430	27600	34910	24930	33220	41260	51980	43530	16070	21840	22530	24820	35370	25430	31150	34290	39300	23610	18260	19080	23640	19320	26910	42410	42510	46280	40160	21990	24230	20230
Com_237_neg	Menadione	C11H10O5S	254.262	1.1	Vitamins	"130-37-0"	17720	20560	18070	27560	10700	19170	14960	10830	10440	10040	8536	12510	11910	13780	10890	7877	8309	5176	14510	22770	13440	8588	5528	7766	16630	7139	4505	21260	17850	20580	6680	7832	10360	6871	7950	7201	17490	16220	19530	11140	16630	9103	7747
Com_238_neg	D-Glutamic acid	C5H9NO4	147.129	2.31	Amino Acid And Derivatives	"6893-26-1"	3078	2408	3373	9439	6466	14890	5244	3918	6411	3523	3814	2513	2274	1082	486	1343	1450	221	7934	9595	6634	1834	758	2060	2414	684	682	13720	15510	13850	5143	4269	6467	1064	1029	1774	16510	18790	14790	11070	10090	8827	4637
Com_239_neg	Icariside E5	C26H34O11	522.21	6.56	Phenylpropanoids and polyketides	"126176-79-2"	27080	23320	24320	31090	12680	28020	19310	46150	36820	63780	78290	54620	12320	12780	17280	23350	16300	24180	20600	22570	32970	15680	14470	23030	23310	13200	20240	28800	24410	12110	21870	37050	17580	24630	29410	21990	35380	41080	27710	40000	38240	53140	30370
Com_241_neg	6'-O-Feruloyl-D-sucrose	C22H30O14	518.164	0.69	Phenolic acids	"118230-77-6"	612400	500100	550600	1287000	787100	1477000	675800	699100	683300	1047000	1092000	1019000	957900	833700	877000	950800	1004000	1076000	717700	810300	816800	697000	765600	782900	1131000	829400	891500	1316000	940700	1445000	1073000	1101000	1155000	795800	883600	841100	1290000	1311000	1269000	1716000	1703000	1596000	1244000
Com_242_neg	Capsianoside I	C32H52O14	660.336	0.98	Terpenoids	"121924-04-7"	109200	107700	128300	111700	76170	137200	51370	108000	86510	71740	45300	51620	68720	75600	72070	23380	35130	55160	82250	99680	145600	62090	54070	62520	29930	30050	27810	53240	41230	52750	40990	44340	39900	22570	23330	27970	95010	95630	188300	65760	57580	50240	38450
Com_243_neg	13(S)-HODE;13(S)-Hydroxyoctadeca-9Z,11E-dienoic acid	C18H32O3	296.235	12.61	Fatty Acyls	"10219-69-9"	2640000	3832000	1497000	17320	12100	20480	42460	21430	40550	17850	35060	32030	1643000	1603000	2162000	374700	242500	232200	1026000	1609000	1992000	423800	333500	300600	179700	153600	192900	216900	180700	273800	180900	110900	152000	82850	119600	110900	88070	127300	62540	106300	149400	76790	60240
Com_244_neg	Sodium Valproate	C8H15NaO2	166.097	5.01	Fatty Acyls	"1069-66-5"	46780	43630	40910	5900	7903	8816	11500	5995	4866	6773	4070	5359	7787	5310	13030	11210	10080	18670	2574	5176	4917	9437	11200	12250	18360	9181	8572	3863	4682	5193	6070	4758	4974	8950	5217	4089	2888	1868	5459	8052	5532	8015	4633
Com_245_neg	Creatine	C4H9N3O2	131.133	1.95	Amino Acid And Derivatives	"57-00-1"	41850	38380	38660	27990	12550	25870	27320	26960	27510	20180	24250	22390	34270	40270	31920	17700	19640	24270	59490	62980	56830	23640	21090	28670	24000	14310	16250	45090	32800	34670	25520	27830	31050	17830	20410	18680	33290	36390	29130	35540	31750	32010	16210
Com_246_neg	2-Deoxyribose 5'-phosphate	C5H11O7P	214.1	1.22	Nucleotide And Its Derivates		69640	76480	62870	120400	70140	125400	52740	61560	66750	32664	34520	32986	22010	27780	34260	15800	17470	13380	117000	142700	156300	35280	27920	35240	14810	20120	10810	106700	117000	107300	45940	48520	38940	22840	20500	22110	99010	112300	109000	70660	46290	59740	33544
Com_247_neg	D-Galacturonic acid	C6H10O7	194.139	1.56	Carbohydrates And Its Derivatives	"685-73-4"	1087000	846200	1063000	2973000	2634000	2971000	3470000	3348000	3872000	4194000	4992000	2966000	513700	430800	561500	52140	49250	46540	1339000	2000000	1817000	558200	719900	725000	53810	53460	40450	2781000	3522000	2360000	2219000	3297000	2245000	528900	501200	555100	3340000	2499000	3208000	4500000	2894000	3995000	1723000
Com_248_neg	N-lactoyl-phenylalanine	C12H15NO4	237.25	6.97	Organic Acid And Its Derivatives		30320	12610	15490	19040	5833	8909	7141	6830	3419	10420	14660	3903	46650	12240	12660	50580	6847	13320	10950	8093	7859	8202	7144	16360	41700	21580	58430	14240	91610	6311	15390	5972	11910	8808	11750	22980	7557	13060	9278	4958	12770	7776	17580
Com_249_neg	Orotidine	C10H12N2O8	288.211	1	Nucleotide And Its Derivates	"314-50-1"	8430	7929	10890	27350	12420	26530	5417	5541	8461	3374	1806	4954	2791	5092	4252	1268	1921	856	26540	16050	19890	3852	6401	4942	3211	3375	2539	20890	28210	13660	4729	1285	4256	2720	3278	1706	21230	29040	27580	3400	12200	2455	842
Com_250_neg	L-Homoserine	C4H9NO3	119.119	1.9	Amino Acid And Derivatives	"672-15-1"	44110	43360	45570	31510	17770	31260	17100	20560	16310	13830	17870	15860	48870	52740	58730	31570	39700	35970	42670	42930	42570	58810	60150	71050	50480	49280	45260	34310	31310	31360	151300	150700	153900	140800	160600	134700	32510	35400	35110	112700	105300	80900	176300
Com_251_neg	D-threo-Isocitric acid	C6H8O7	192.124	1.41	Organic Acid And Its Derivatives	"6061-97-8"	21670000	16170000	21570000	61810000	48540000	60480000	72470000	68730000	76790000	84990000	69980000	60960000	10190000	8472000	11210000	913800	1167000	1096000	25430000	39210000	36470000	10280000	14190000	13250000	1099000	963800	682700	55540000	74200000	50240000	43860000	67570000	45510000	9995000	10200000	10990000	69680000	51230000	63630000	95340000	59920000	82770000	34260000
Com_252_neg	9-KODE	C18H30O3	294.2	12.07	Fatty Acyls	"54232-59-6"	726200	1097000	367800	30860	13200	23980	51500	23700	60660	26260	70220	53070	296200	374000	390200	73440	41200	36830	886900	971800	1464000	107300	161500	59160	21810	40310	32470	440100	249000	383500	125900	35060	52090	27940	49590	35570	135300	308700	127400	46170	90060	44990	27240
Com_253_neg	D-Glucose 6-phosphate	C6H13O9P	260.03	0.86	Carbohydrates And Its Derivatives	"56-73-5"	65380000	66000000	50460000	41640000	22710000	43320000	28670000	25290000	27200000	19140000	20900000	20810000	20660000	26330000	25400000	23950000	19290000	26620000	53830000	59710000	53480000	26410000	32590000	29420000	23900000	20440000	19540000	52980000	49890000	52840000	22870000	26100000	18940000	14070000	15310000	13360000	56120000	57760000	59700000	26910000	23390000	24110000	12560000
Com_254_neg	Amygdalin	C20H27NO11	457.43	5.68	Carbohydrates And Its Derivatives	"29883-15-6"	180200	118800	164800	20700	12060	22660	53220	62540	46440	49620	46420	30420	43710	66170	34160	29270	27180	27800	62470	69740	43300	24080	23850	38000	25790	15400	23580	11140	15880	12440	28850	14780	14570	11540	10830	13560	12600	12120	16540	22110	19380	28640	9598
Com_255_neg	L-(+)-Rhamnose Monohydrate	C6H14O6	182.17	0.96	Carbohydrates And Its Derivatives	"10030-85-0"	15680	23500	18730	23470	20930	20480	9885	17760	16790	10730	9492	5314	12390	12420	13180	10300	5769	11580	34070	32600	39450	9317	11640	14460	6623	6747	5722	40310	54270	40230	24070	19020	22380	8304	9300	8879	62790	61740	60700	33180	25670	33370	18390
Com_256_neg	2-Deoxyribose 1-Phosphate	C5H11O7P	214.11	1.01	Nucleotide And Its Derivates	"17210-42-3"	45090	38310	40660	64660	55960	80150	32190	29490	33450	22110	15570	23400	17210	31029	27170	37610	23040	26590	68370	86810	86210	27260	26190	30860	20890	38670	31680	71650	63910	58200	22880	42130	24440	10520	23667	28850	49770	51310	65730	43680	39240	32740	26400
Com_257_neg	phosphoribosyl pyrophosphate	C5H13O14P3	196.25	0.88	Pentose phosphates		168400	259800	157900	54600	20650	53130	107400	110000	121300	68780	74480	91340	63980	140600	137800	160900	153100	89900	157700	229500	258200	144100	82170	106500	106500	133800	113200	76010	95700	74650	65030	72930	70320	106000	73900	107200	58310	46310	40250	49590	61980	43130	43020
Com_258_neg	Succinic anhydride	C4H4O3	100.073	0.88	Organic Acid And Its Derivatives	"108-30-5"	1801000	1522000	1807000	891500	1688350	1088000	2030000	2089000	2491000	1454000	2255000	1685000	2158000	2019000	2093000	1096000	1391000	1760000	2999000	3954000	3794000	1500000	1811000	2277000	1895000	1502000	1162000	7085000	6641000	4814000	3058000	2750000	2981000	1246000	2073000	1171000	3552000	2587000	2017000	5678000	4793000	4911000	1159000
Com_259_neg	D-Tagatose	C6H12O6	180.156	0.96	Carbohydrates And Its Derivatives	"87-81-0"	779200	762000	915100	984000	822300	1078000	715900	638500	665400	756600	859400	774300	645400	678700	646600	442700	400200	427300	1644000	1557000	1537000	636000	612800	620900	393600	348100	361000	1303000	1170000	1301000	763500	772300	818200	521300	564500	538200	1439000	1581000	1496000	943000	1032000	988300	939400
Com_260_neg	Manninotriose	C18H32O16	504.437	0.9	Fatty Acyls	"13382-86-0"	9168	12700	14030	22080	25820	17080	10850	7852	5790	15980	17980	11150	10870	13200	13190	7219	10650	5567	17780	19750	30320	8624	8724	13570	11860	8955	12320	12200	8401	21740	21960	19300	18970	15870	13100	9165	11000	27510	22780	13260	10070	20130	17420
Com_261_neg	Chicoric acid	C22H18O12	474.371	5.57	Organic Acid And Its Derivatives	"70831-56-0"	2432	6356	2899	10710	13020	10700	1438	14740	5120	9532	6128	3140	1035	672	3306	2501	2077	2294	5816	7220	5692	291	3171	3294	2638	795	1800	4282	5589	3994	3835	1136	2694	297	2388	2625	916	5559	5374	2985	428	2378	2236
Com_262_neg	3-Phenylpropanoic acid	C9H10O2	150.174	0.7	Cinnamic acids and derivatives	"501-52-0"	583700	531000	616500	480100	389000	471000	541400	521000	502900	513100	548900	556900	411000	447800	487700	423700	414300	418000	443200	490100	487000	483700	503100	541500	403500	420400	409000	485100	443600	453300	487200	488300	537700	426400	404500	397200	500800	435000	434100	497500	577600	593800	444200
Com_263_neg	N-Acetyl-L-glutamic acid	C7H11NO5	189.166	1.81	Amino Acid And Derivatives	"1188-37-0"	324300	361800	333400	2347000	1168000	2385000	1501000	1503000	1693000	845800	1070000	937400	117900	106700	133100	42650	51480	69340	1366000	1416000	1371000	343000	366400	394600	161100	115600	115800	3448000	3130000	2963000	2395000	2591000	2415000	555300	691000	665200	3181000	3268000	2866000	4500000	4582000	4017000	1610000
Com_264_neg	Cyclic AMP	C10H12N5O6P	329.206	1.75	Nucleotide And Its Derivates	"60-92-4"	317300	257200	377800	10670	5601	12140	155000	18890	61280	9871	20240	19820	882700	744300	797100	385600	450400	307800	450400	611800	582500	616800	405600	439700	340100	313500	360800	281800	329800	233100	371000	300700	258700	145300	150800	215900	109200	161900	113400	343800	343800	194000	140400
Com_265_neg	Pseudouridine	C9H12N2O6	244.07	1.87	Nucleotide And Its Derivates	"1445-07-4"	202900	151400	337700	11710	83333	16490	90650	26020	45520	15510	37480	34890	353700	316300	270700	216300	232900	216300	319700	329900	311900	237700	180300	206500	248900	238500	241000	202200	177100	145200	195600	151700	244600	135400	183300	164800	143500	134100	116700	222000	267000	203500	138600
Com_266_neg	Caffeic acid O-glucoside	C15H18O9	342	5.38	Cinnamic acids and derivatives		59710	44750	37110	271300	213700	307800	43300	146100	64310	524000	468700	337700	90860	96310	78650	587700	459800	657500	77980	90230	88870	57680	85450	92370	962800	623000	638800	107500	102100	89250	114400	104600	102300	641800	727500	638800	85280	81610	69390	119700	114500	97840	268900
Com_267_neg	Methylenesuccinic acid	C5H6O4	130.099	4.25	Fatty Acyls	"97-65-4"	154000	147300	144900	114000	129000	66060	125800	106500	183300	48170	76730	66730	167900	133400	132900	100500	81960	96330	186500	184500	171200	157600	94620	125700	110800	79840	74710	97170	110600	103300	154600	129900	140100	59110	98750	103700	81760	104900	71570	147500	126600	137100	114900
Com_268_neg	N-[(Tert-butoxy)carbonyl]-L-tryptophan	C16H20N2O4	304.341	18.31	Amino Acid And Derivatives	"13139-14-5"	7433	10770	10650	10950	9677	11370	8824	12120	9488	8747	8966	11050	9887	8637	11850	10260	7793	12140	11980	11840	9031	11220	10440	8809	10600	8607	11910	7862	9881	8783	11310	8693	10530	11400	8560	8674	7803	11000	9080	8420	8646	11340	10030
Com_269_neg	Indole-5-carboxylic acid	C9H7NO2	161.048	0.69	Indoles and derivatives	"1670-81-1"	4098000	3915000	3538000	2788000	1960000	2939000	4208000	4154000	4219000	3724000	4002000	3846000	3162000	3121000	3262000	2412000	2519000	2656000	3192000	3473000	2868000	2909000	2968000	3287000	2458000	2306000	2364000	2914000	2784000	2889000	3215000	3301000	3396000	2219000	2346000	2207000	2752000	2544000	2672000	4007000	4141000	3683000	2424000
Com_270_neg	Deoxycytidine	C9H13N3O4	227.091	1.81	Nucleotide And Its Derivates	"951-77-9"	16160	20530	24230	1498	2990	910	3039	1911	3178	4454	3779	3001	7967	9416	12620	4669	6532	5665	3149	1248	2340	6827	7243	6483	6552	2210	5262	1757	3289	974	2209	3923	3001	1964	2876	1716	3912	1701	1941	1977	2868	1921	2667
Com_271_neg	Isohemiphloin	C21H22O10	434.121	6.39	Flavanones	"3682-02-8"	9060	7767	6671	16780	14770	15310	5983	9970	11710	16160	24020	15370	6353	6736	2850	6398	4853	8494	3072	6152	9000	7607	10690	5135	7925	6466	3948	8479	5260	8343	12390	10580	8548	4893	4383	5000	6432	9832	9708	16050	18990	7386	11800
Com_272_neg	Kaempferol 3-O-robinobioside	C27H30O15	594.159	6.55	Flavones and Flavonols	"17297-56-2"	1026000	1204000	1141000	13520000	10250000	16410000	2322000	4324000	3067000	2520000	2937000	1953000	10590	24760	23460	8836	13300	3983	35720	37120	32690	11940	10160	12400	1761	3982	3101	384200	357100	431900	50030	44060	28240	4395	8826	4432	882700	1066000	750100	86530	84020	75470	13710
Com_273_neg	Phlorizin	C21H24O10	436.41	7.24	Flavonoids	"60-81-1"	39130	51580	47400	12240	7994	12810	19910	83770	59350	59580	61130	55860	9949	3805	10020	8313	8048	9887	4083	8833	8703	9343	3140	5730	3278	9229	6826	8349	5744	2344	12200	10040	12707	9049	9331	8063	7991	5297	4522	13640	15560	21160	14278
Com_274_neg	4'-Hydroxyacetophenone	C8H8O2	136.15	6.6	Ketones	"99-93-4"	10930	19570	15500	22320	22710	16090	15730	11770	12710	22210	16380	20220	20470	28840	15490	44310	22170	18800	37320	20350	16620	29040	19460	13430	33240	24970	34740	25890	37480	21640	25000	36160	19980	18990	36750	27700	22740	22210	22780	15620	23410	24950	20750
Com_275_neg	UDP-D-glucose	C15H24N2O17P2	566.1	0.95	Nucleotide And Its Derivates	"133-89-1"	48950000	50120000	45650000	14130000	8504000	14650000	14350000	17180000	17990000	10500000	11580000	10960000	19710000	25520000	27820000	2850000	4707000	4918000	17570000	19400000	17270000	18770000	22670000	26940000	4385000	4253000	3311000	13240000	12920000	11680000	13440000	16360000	11830000	2844000	2236000	2107000	14230000	12090000	11730000	20190000	15790000	17780000	6414000
Com_276_neg	Tanshinlactone	C17H12O3	264.275	5.2	Steroids and steroid derivatives	"105351-70-0"	35700	41340	30430	11430	20190	12480	522	7287	2082	13730	8492	4679	12500	12460	8558	44210	38020	39630	6332	2346	1045	1043	2079	8308	49510	27780	24380	1295	1559	778	1285	1558	10073	8046	11090	10890	10300	7758	7484	8786	2075	777	3634
Com_277_neg	Vitamin B1	C12H17ClN4OS	300.808	0.82	Vitamins	"59-43-8"	1341000	1158000	1476000	44400	19250	22400	20340	27120	16710	16220	11670	9151	705800	840700	772100	95500	91840	71640	717000	846400	833400	295200	281500	331200	42620	44250	59540	288600	184300	141800	109200	65060	110000	22190	33400	30000	126700	128100	96080	99370	131100	85330	32340
Com_278_neg	2-Aminoethanesulfonic acid	C2H7NO3S	125.015	1.04	Organic Acid And Its Derivatives	"107-35-7"	36558	13110	20020	10110	4524	4713	14780	7194	18080	8352	11390	16720	38080	34300	43550	20760	26740	15915	54390	62910	40190	17920	20390	28210	16999	28390	20760	25730	22239	15730	32450	18870	26020	17110	28970	15530	17560	17400	20070	23840	21280	16430	8130
Com_279_neg	L-threo-3-Methylaspartate	C5H9NO4	147.053	0.87	Amino acids and derivatives	"6061-13-8"	44800000	40940000	40570000	53870000	33610000	51590000	20430000	23240000	21590000	15390000	17050000	18140000	25970000	27740000	28040000	19210000	20430000	20790000	43410000	41080000	40100000	22260000	27180000	31530000	17110000	16160000	15400000	37790000	35930000	37320000	20650000	23970000	17550000	12440000	14850000	13890000	35990000	39480000	38150000	21370000	17270000	20220000	14280000
Com_280_neg	2,2-Dimethylsuccinic acid	C6H10O4	146.058	0.84	Organic Acid And Its Derivatives	"597-43-3"	36700000	36600000	39390000	2800000	2037000	2762000	4397000	5363000	4599000	2411000	2630000	2471000	19740000	19730000	20620000	17850000	18510000	18970000	6381000	7239000	5655000	11960000	11280000	15370000	13040000	11840000	11830000	6251000	5877000	5853000	6414000	6920000	6132000	2494000	2357000	2372000	6252000	7124000	6726000	10460000	10340000	10090000	3846000
Com_281_neg	2-O-Caffeoylmalic acid	C13H12O8	296.053	0.69	Phenolic acids	"53755-04-7"	38440	32310	33880	97750	78030	98040	56270	42420	43030	67680	53100	54710	66860	46000	46800	73880	88100	102500	41350	51750	58460	39710	46940	57440	103700	79180	78780	121100	93120	98650	64670	75330	83300	88860	77760	82100	132500	130500	125600	101500	110000	88580	113300
Com_282_neg	Eicosadienoic acid	C20H36O2	308.272	6.32	Fatty Acyls	"5598-38-9"	132800	85700	92870	322600	136400	353000	145400	143500	187200	125000	133200	79820	75360	89660	76910	43280	38050	54010	493000	463000	446800	59210	89060	92010	28060	62248	39860	425500	367900	361500	105100	135700	107100	54620	43940	92860	403100	338100	307500	167900	166600	171000	84670
Com_283_neg	Eucommiol	C9H16O4	188.105	7.31	Terpenoids	"55930-44-4"	687100	619700	676000	388000	425100	386100	515600	419200	517400	396900	429400	447100	1362000	1191000	1740000	842700	717500	794800	1126000	1358000	1596000	987900	748300	811300	887200	648600	661900	764000	694100	662700	801000	684600	763900	547200	633500	609800	630500	611600	588200	725300	792900	729900	529100
Com_284_neg	2-Hydroxycinnamate	C9H8O3	164.047	6.48	Cinnamic acids and derivatives	"583-17-5"	132000	83170	204900	49770	32680	58980	26730	37090	28250	37040	33900	18040	28480	40340	70190	6954	33423	45340	274500	421000	335100	45830	97000	102600	13900	39036	34444	211000	214900	163100	47690	59040	53820	10430	47120	42546	208100	233800	183300	85220	83770	104100	26150
Com_285_neg	Dimethylmalonic acid	C5H8O4	132.042	0.67	Organic Acid And Its Derivatives	"595-46-0"	2337000	2197000	1798000	5122000	3886000	4852000	2241000	2517000	2515000	2897000	2908000	2995000	2627000	2451000	2430000	4000000	4247000	4493000	2168000	2575000	2558000	2553000	2230000	2338000	4873000	4087000	3919000	4699000	5277000	5224000	3283000	2991000	3383000	3589000	3969000	3828000	6191000	7078000	6757000	4122000	3828000	4290000	5066000
Com_286_neg	1-O-Galloyl-D-glucose	C13H16O10	332.074	4.68	Tannins	"58511-73-2"	25200	35180	22250	219700	187900	268400	13260	111400	35880	137200	118400	75820	8197	11420	11300	6394	9071	8231	38140	52810	53930	7878	6770	14870	9685	9187	8076	72200	77080	71240	21070	21620	24360	15130	15350	15740	56020	56210	57050	35150	38320	29040	48530
Com_287_neg	Glycitin	C22H22O10	446.41	6.324	Isoflavonoids	"40246-10-4"	2474	2123	8030	9472	7131	14760	4653	16240	11490	7719	13070	11850	6365	7470	6363	4519	4310	7503	13433	12474	12043	4860	5166	5847	8245	6725	5184	20010	16000	29080	5871	3476	5400	5039	6765	5424	45370	24980	24060	3841	1946	2028	1219
Com_288_neg	Inositol	C6H12O6	180.16	0.85	Alcohols and polyols	"87-89-8"	628900	545300	578200	944900	671000	930200	583300	545800	537000	655100	687000	633600	515700	488700	626600	257400	267000	248900	1382000	1380000	1263000	513000	458300	600200	239600	230200	224400	1387000	1363000	1348000	729000	658800	744400	421000	489900	485700	1144000	1394000	1337000	914700	902800	901200	813600
Com_289_neg	Benzoic Acid	C7H6O2	122.12	7.497	Benzoic acids and derivatives	"65-85-0"	59920	61970	57450	34470	34240	49700	24310	53870	68890	46980	70560	52230	48110	47110	43470	59270	66930	51170	35550	64040	68500	49310	59540	51530	37610	57290	61210	43640	42530	66800	48670	40920	42720	47120	79000	41170	49310	60590	33040	42640	54510	63110	65240
Com_290_neg	Salicylic acid	C7H6O3	138.12	7.67	Phytohormones	"69-72-7"	331700	224300	305300	45680	34020	64970	130100	71510	97480	68740	85830	75290	181600	126300	142100	122400	84550	118900	177600	169500	155000	212500	128800	194600	121600	114900	129100	260500	224000	157200	419300	355500	484800	103900	195800	148000	205100	230100	146700	574200	549100	453500	276300
Com_291_neg	Guaiacol	C7H8O2	124.137	3.62	Phenols And Its Derivatives	"90-05-1"	11370	8473	8490	14267	9868	14947	9584	8232	10290	24430	28340	22990	3088	2462	2861	10600	7672	11090	12194	12418	11177	2103	2778	2903	12570	9529	8709	8854	8176	9205	5247	4398	5234	11190	13820	10720	7572	7972	9184	3840	4389	5127	7704
Com_292_neg	GMP	C10H14N5O8P	363.221	0.94	Nucleotide And Its Derivates	"85-32-5"	352500	462800	165300	188600	76190	159700	78660	193700	223300	79590	63060	46720	8736	75680	82131	63500	38130	48260	309700	331900	300400	68950	8766	47690	50890	25170	50230	104700	106900	109800	8912	42410	84050	9056	38320	9599	123900	155400	175500	59860	75330	10900	19490
Com_293_neg	Guanidinoethyl Sulfonate	C3H9N3O3S	167.187	1.03	Organic Acid And Its Derivatives	"543-18-0"	5664	7511	7001	3821	3311	2070	2126	2662	6453	3690	5285	2021	7471	10810	5697	6067	8717	7016	10190	21340	12360	6640	8893	9318	3266	6721	4184	5722	5463	4047	5696	2922	7527	5098	4969	4541	2067	7315	4363	9356	7733	11130	2348
Com_294_neg	D-Xylulose	C5H10O5	150.13	1.01	Carbohydrates And Its Derivatives	"551-84-8"	13480	16880	5662	34230	17810	27310	15060	21630	22620	5552	4358	6364	7641	9135	6831	7841	7359	5313	19390	31080	33620	17270	4910	7928	6702	8322	5975	20490	12810	18720	21140	6804	21500	3553	11620	6071	30650	19820	25600	18260	19540	31090	3413
Com_295_neg	Oxalacetic acid	C4H4O5	132.07	0.69	Organic Acid And Its Derivatives	"328-42-7"	1123000	1152000	1218000	2521000	1923000	2562000	1081000	1108000	1111000	1400000	1281000	1142000	1225000	1211000	1003000	1973000	1990000	2194000	1116000	1105000	1428000	1212000	1332000	1282000	2298000	2065000	1974000	2432000	2670000	2723000	1623000	1564000	1722000	1873000	2096000	2088000	2851000	2999000	3298000	2016000	2103000	1889000	2478000
Com_296_neg	Heptamethoxyflavone	C22H24O9	432.42	7.08	Flavonoids		77340	80700	86020	12690	5903	18660	25080	32250	36280	20760	13200	15250	7992	20280	4573	2923	12561	12120	33800	47330	21920	13360	5505	15454	12416	8804	9073	6504	11000	16188	10654	5023	14095	7774	8625	7939	13894	10093	11013	14707	5055	5606	8611
Com_297_neg	L-Fucose	C6H12O5	164.069	0.95	Carbohydrates And Its Derivatives	"2438-80-4"	35780	37710	32560	45920	26660	44300	29380	16640	27170	13130	14420	17780	25550	22220	31090	20260	19370	13540	54080	65790	66580	24860	19340	21940	24030	5288	17250	91780	94460	89840	40830	40810	56520	17560	24150	18360	98430	100800	100300	63930	67460	68990	45550
Com_298_neg	L-Proline	C5H9NO2	115.131	0.94	Amino Acid And Derivatives	"147-85-3"	6914000	6243000	7040000	1473000	929800	1470000	1282000	1462000	1301000	800000	745800	671400	4405000	4394000	4351000	3303000	3448000	3734000	2632000	3203000	2780000	3176000	3292000	3776000	3024000	2397000	2644000	2259000	2322000	2293000	1411000	1378000	1252000	659200	585500	554900	2196000	2256000	1987000	2214000	1895000	1763000	760000
Com_299_neg	Ala-Gln	C8H15N3O4	217.22	0.85	Amino Acid And Derivatives	"39537-23-0"	196700	160900	253300	50380	43280	61610	114000	106600	74600	63820	59480	54080	260200	242400	213000	208100	243700	139200	311800	307800	303200	244900	203600	202100	181900	237000	237500	138500	169800	155900	125600	123800	97650	77690	69460	78310	135300	148300	110700	165000	163800	156400	96320
Com_300_neg	Nicotinamide N-oxide	C6H6N2O2	138.12	18.288	Vitamins	"1986-81-8"	1276000	1294000	1281000	1275000	1189000	1238000	1314000	1277000	1278000	623100	1225000	1214000	1231000	1244000	1222000	1220000	1196000	1226000	581800	1203000	1179000	1152000	1168000	1147000	1160000	1131000	1163000	534100	1131000	1188000	1225000	1149000	1158000	1149000	1110000	1112000	1114000	1104000	1112000	1155000	1115000	1165000	1140000
Com_301_neg	Vitamin C	C6H8O6	176.12	1.03	Vitamins	"50-81-7"	14770	15770	17250	17100	21500	37350	6980	4405	11390	16250	7988	8164	8370	9574	13610	7704	3760	6037	23350	26560	28180	7914	5024	5578	3863	9369	3078	26420	26720	21760	7681	11840	6309	6651	5113	9481	53150	27910	44840	11210	13840	11490	11380
Com_302_neg	2,6-Dihydroxypurine	C5H4N4O2	152.11	1.714	Nucleotide And Its Derivates	"69-89-6"	114400	64540	97000	31380	13780	27040	42880	35850	53590	32280	37310	25640	352100	63530	56240	74450	39640	41190	110000	98380	92140	86420	41530	52200	172700	39760	89660	97620	327800	54230	76120	59540	51800	33490	38240	32360	55300	36880	25990	59680	53460	56240	30700
Com_303_neg	Dipsacoside B	C53H86O22	1075.24	6.756	Terpenoids	"33289-85-9"	10530	2169	12380	20570	6621	22170	8490	5363	2174	4123	9324	8684	4363	1321	7479	7013	3025	6996	9570	12420	11960	4721	6382	8360	3352	3072	1310	36610	28530	29000	17010	11400	9529	4840	3074	3503	31720	42490	34850	14590	16580	8773	6964
Com_304_neg	3-Hydroxy-glabrol	C25H28O5	40.499	4.82	Flavonoids	"74148-41-7"	25040	17560	21850	3407	3418	1312	3546	4743	3550	2206	5657	1635	8477	4729	10740	12130	9054	11430	3224	5018	1383	6377	8985	5886	9093	6970	7379	4326	2283	2113	2818	1345	2611	2535	1307	3645	3442	1751	1489	1412	978	5142	1489
Com_305_neg	4-Hydroxy-2-Oxoglutaric Acid	C5H6O6	162.098	0.7	Organic Acid And Its Derivatives	"1187-99-1"	4745000	4695000	4576000	3236000	2306000	3389000	4444000	4637000	5008000	4061000	4782000	4410000	3398000	3420000	3808000	2794000	2759000	2656000	3411000	3810000	3660000	3731000	3746000	3757000	2986000	2711000	2467000	3327000	3406000	3264000	3952000	3909000	3728000	2339000	2867000	2338000	3158000	3143000	2951000	4837000	4597000	4617000	2946000
Com_306_neg	gamma,gamma-Dimethylallyl pyrophosphate	C5H12O7P2	246.092	0.95	Prenol lipids	"358-72-5"	7605000	10200000	7218000	3325000	2038000	3119000	3546000	4308000	3585000	2440000	1903000	2263000	1971000	2058000	2491000	1172000	929900	823000	4829000	5367000	5513000	1484000	1279000	1157000	716400	597300	592700	2758000	2663000	2522000	1865000	1998000	1956000	823900	847800	880400	2281000	2252000	2613000	2276000	2305000	2221000	1014000
Com_307_neg	beta-D-Lactose	C12H22O11	342.297	1	Carbohydrates And Its Derivatives	"5965-66-2"	352100	450700	291800	774600	1121000	675800	300800	536300	471600	394900	374200	368400	195000	177100	181500	152100	149200	145300	244800	250300	216900	172800	153900	184600	132600	148900	130200	202300	242000	301000	170700	161500	179500	144100	154400	152700	566400	599800	832800	242500	211200	229100	246600
Com_308_neg	beta-Hydroxyisobutyrate	C4H8O3	104.104	2.4	Organic Acid And Its Derivatives	"2068-83-9"	60820	57720	63890	36370	19580	37780	36530	36730	41150	22280	24310	20750	26940	30650	29300	9909	10840	10870	83270	92120	90260	34890	28760	35540	13810	14200	14320	47080	49040	50090	36930	34190	35300	13690	17870	15920	49380	50160	42510	38710	35140	36930	20330
Com_309_neg	4-Hydroxy-3-methoxyphenylglycol sulfate potassium salt	C9H11KO7S	302.343	0.92	Benzene and substituted derivatives	"71324-20-4"	106100	112000	103800	112300	46920	117500	132200	149500	150500	141200	125000	127500	112000	90420	107300	126400	115900	95130	55720	101400	54920	82890	84250	107000	117600	100500	111600	90370	58220	45060	82640	102000	74440	76170	99900	77750	39130	61190	52600	108500	90810	86020	53780
Com_310_neg	Sennoside A	C42H38O20	862.74	6.771	Anthracenes	"81-27-6"	1260	5841	3051	1701	2735	2444	10040	6250	6272	5931	10060	10560	6115	4865	845	4649	4256	4671	2098	8320	5589	2944	1661	2954	5497	4568	4931	2959	2577	1071	12190	8254	6724	2103	1247	1276	991	3626	3978	15560	13840	8931	3805
Com_311_neg	L-Threonine	C4H9NO3	119.119	0.888	Amino Acid And Derivatives	"72-19-5"	1741000	1615000	1557000	1298000	923900	1237000	754700	684600	736200	436300	508100	478300	1697000	1540000	1819000	1400000	1405000	1276000	1917000	1937000	1768000	1540000	1387000	1586000	1277000	1177000	1271000	2799000	3084000	2547000	1044000	1071000	1202000	564100	566600	568100	2195000	2481000	2226000	1316000	1491000	1202000	620400
Com_312_neg	L-Asparagine	C4H8N2O3	132.12	0.843	Amino Acid And Derivatives	"70-47-3"	20130000	19330000	20160000	1403000	1060000	1472000	2859000	3374000	2723000	1275000	1340000	1105000	12940000	12030000	13020000	9722000	9895000	10450000	6394000	7245000	5668000	9555000	9399000	11610000	8510000	7677000	7690000	3041000	2723000	2532000	3395000	3207000	2856000	1486000	1186000	1184000	2157000	2575000	2254000	4198000	4309000	3791000	1366000
Com_313_neg	L-Glutamine	C5H10N2O3	146.14	0.868	Amino Acid And Derivatives	"56-85-9"	62270000	58110000	62580000	4813000	3330000	4703000	7948000	9270000	7842000	4549000	4825000	4282000	34460000	31550000	34410000	29870000	31430000	32690000	11310000	13310000	9711000	20880000	19120000	26510000	22570000	19970000	19960000	10890000	10220000	10270000	11440000	11280000	10340000	4122000	4295000	3999000	11030000	11710000	11320000	18050000	17640000	16860000	6823000
Com_314_neg	D-Ribose 5-phophate	C5H11O8P	230.11	0.89	Organic Acid And Its Derivatives	"207671-46-3"	1194000	1128000	1081000	466000	233400	453100	779600	741200	870200	549700	608300	602000	973000	1009000	1094000	511500	548900	644100	1393000	1513000	1485000	689700	854000	915700	597700	581000	540600	1261000	1139000	1020000	1053000	1091000	1016000	498500	566900	600800	1110000	1063000	1078000	1978000	1822000	1879000	880800
Com_315_neg	D-Xylulose 5-phosphate	C5H11O8P	230.11	0.9	Pentose phosphates	"4212-65-1"	1662000	1677000	1630000	692000	373400	687900	694100	736000	743700	473900	501700	483000	1382000	1331000	1321000	1242000	1224000	1228000	1995000	1933000	2099000	1007000	1073000	1220000	1224000	1193000	1023000	1269000	1301000	1088000	793600	852600	789500	791900	962700	838100	1165000	1156000	1093000	1003000	955300	866600	784800
Com_316_neg	Glutaric Acid	C5H8O4	132.115	0.7	Organic Acid And Its Derivatives	"110-94-1"	1912000	2262000	2025000	4763000	3673000	4711000	2243000	2142000	2060000	2992000	2964000	2441000	2366000	2300000	2390000	3388000	3738000	3758000	2108000	2275000	2215000	2232000	2102000	2390000	4422000	3970000	3404000	4506000	4838000	4996000	2981000	3280000	3287000	3696000	3847000	3581000	5859000	6387000	5817000	3900000	4192000	3671000	4773000
Com_317_neg	Linolelaidic Acid (C18:2N6T)	C18H32O2	280.445	15.16	Fatty Acyls	"506-21-8"	286100	544500	283700	181700	162700	296600	199300	239000	274300	228400	270200	359600	401400	496600	274600	254800	147300	229500	803800	491900	630800	312700	193800	371900	208500	187700	180300	379800	409500	498900	279900	218000	177000	283800	307700	196900	254000	335300	264800	194700	339200	242600	203100
Com_318_neg	Fumaric Acid	C4H4O4	116.072	1.11	Tca Cycle	"110-17-8"	3451000	3202000	3412000	6419000	4562000	6259000	6137000	6002000	6126000	6065000	7362000	6385000	2860000	2803000	2786000	1789000	1924000	1940000	4570000	4715000	4685000	3123000	2988000	3140000	1981000	1717000	1709000	8780000	8406000	7852000	6723000	6953000	6998000	3718000	3969000	3549000	10070000	9787000	9652000	11540000	11380000	10510000	7674000
Com_319_neg	Abscisic Acid	C15H20O4	264.32	8.13	Phytohormones	"21293-29-8"	8394	11210	8003	47930	21060	38910	24800	26910	33520	16390	23130	25550	12660	4764	15040	8954	10460	8181	27290	37280	32010	11620	9888	15860	12130	14150	8679	72930	74370	65640	19110	23470	24930	11810	13210	11300	101600	110700	98850	36670	49820	30290	10080
Com_320_neg	5-Hydroxymethyluracil	C5H6N2O3	142.113	0.96	Pyrimidines and pyrimidine derivatives	"4433-40-3"	55880	43830	50120	44990	34740	31970	77110	68650	42160	72210	64630	92200	59850	45510	43870	73930	48870	45030	26470	36990	25890	64160	44620	51730	59960	47390	49340	39190	21940	25730	59770	51990	57520	72220	54360	68050	18150	24160	11130	33050	43550	53850	46340
Com_321_neg	alpha-Ketoglutaric acid	C5H6O5	146.098	0.87	Tca Cycle	"328-50-7"	7223000	6610000	7516000	521200	444800	523300	874000	1089000	864800	500600	509400	470800	3489000	3583000	3791000	3477000	3577000	3679000	1196000	1370000	1071000	2526000	2205000	2932000	2722000	2315000	2312000	1160000	1079000	1145000	1329000	1351000	1149000	508400	492100	478100	1268000	1274000	1213000	2066000	1927000	1890000	778600
Com_322_neg	Sapropterin	C9H15N5O3	241.247	18.284	Organoheterocyclic compounds	"62989-33-7"	7174	4490	8364	4044	5161	4484	3905	5467	3252	5837	5049	5820	10740	5312	5294	9103	5058	5149	4148	4852	2891	7862	3357	7974	7273	6250	6316	6101	2580	5630	4436	5058	4982	6180	4200	5860	4117	5697	6409	6130	6268	6206	6643
Com_323_neg	Rutin	C27H30O16	610.518	6.451	Flavones and Flavonols	"153-18-4"	1042000	1172000	1200000	11860000	12940000	15600000	552700	7085000	2737000	4933000	3278000	2725000	21730	15080	36940	50010	207300	34250	16930	17920	21940	5707	21190	27710	8133	6114	6929	219200	133600	75390	82580	72550	35580	44850	32660	33850	235300	256900	201700	305700	240500	320900	46710
Com_324_neg	Vitexin	C21H20O10	432.38	6.559	Flavones and Flavonols	"3681-93-4"	147900	125200	154200	26880	24990	46290	62250	92980	99230	34850	36390	44260	55830	62760	39030	6544	3810	10200	93730	126900	118600	33380	42850	40080	4666	9624	13930	46920	48210	50960	33420	28960	32830	10170	9612	10570	45940	39070	26360	48430	27410	29180	10660
Com_325_neg	Luteolin 7-O-glucoside	C21H20O11	448.38	6.664	Flavonoids	"5373-11-5"	45740	38780	23670	31990	17130	36370	6228	41080	24590	5172	14860	7072	2110	3250	3727	787	802	1295	9837	9487	18670	3628	5869	12320	3043	4806	704	9598	4875	9030	3049	7782	8084	4100	5307	4477	10740	6399	8821	2699	12489	9856	1414
Com_326_neg	Citramalate	C5H8O5	148	2.04	Organic Acid And Its Derivatives	"2306-22-1"	66860	55540	58240	317300	167600	353800	127100	123000	143400	84880	111900	87820	49020	46790	50850	19970	17510	25620	186500	220200	190300	45910	48840	49960	29420	18030	17670	423500	391200	385100	129500	126500	132200	34450	36710	44440	486300	526300	463800	288300	272900	272100	106600
Com_327_neg	UDP	C9H14N2O12P2	404.16	0.7	Nucleotide And Its Derivates	"58-98-0"	2553000	2214000	2108000	7463000	5205000	8466000	2888000	2822000	2688000	5072000	5168000	4327000	4392000	4087000	3836000	5905000	6402000	6760000	3423000	3710000	3630000	3393000	3212000	3678000	6929000	5986000	5484000	8449000	8372000	7873000	5385000	5408000	5654000	5176000	6143000	5386000	8647000	9077000	8595000	8177000	7952000	7590000	7963000
Com_328_neg	12,13-EODE	C18H32O3	296	12.67	Fatty Acyls		2559000	3760000	1566000	17880	12240	18850	47240	19940	38110	17730	36360	26860	1622000	1628000	2106000	397300	247400	242000	1019000	1674000	1970000	450400	338100	325900	180000	168300	205100	222100	190700	271500	185800	121900	154200	83270	117100	110600	83920	133500	61310	98800	148900	80350	66610
Com_329_neg	13-HPODE	C18H32O4	312.1	11.45	Fatty Acyls	"33964-75-9"	9652000	16120000	5197000	44330	23130	38820	167600	104400	224900	78990	192800	165600	5338000	7417000	8816000	1277000	798700	759100	1693000	2821000	3522000	1113000	1178000	828300	673500	729200	606300	532100	347200	514400	747700	360600	478100	362400	512800	438400	228100	311100	183500	475100	788700	402500	382800
Com_330_neg	Gluconolactone	C6H10O6	178.14	1.02	Carbohydrates And Its Derivatives	"90-80-2"	38390	39200	34330	61460	33620	56210	14270	15880	20680	9962	15410	24480	37530	46050	29010	30600	34720	34010	61200	59090	68920	29480	32400	28840	23950	21450	17820	60390	73910	63440	22140	28820	21480	19870	17910	13040	93720	91590	81380	41660	37360	30990	25190
Com_331_neg	DL-Panthenol	C9H19NO4	205.25	4.647	Fatty Acyls	"16485-10-2"	30490	6444	9819	17691	7263	2748	8576	9882	4681	2943	3695	4496	35590	20500	13450	4354	10780	8141	8627	7460	14380	17880	11200	8105	42110	20600	6044	2845	53300	8076	8417	43670	11180	6582	15740	22470	8165	3274	15940	9618	8466	16300	14150
Com_332_neg	Pyridoxine 5'-phosphate	C8H12NO6P	249.04	0.89	Vitamins	"447-05-2"	138500	124100	172700	52290	41340	38230	192900	158600	178200	176600	170200	173000	124600	107700	112900	156300	155500	168000	110400	96880	78690	110200	108900	100400	139200	146400	161100	71380	66040	58630	103200	97920	120000	157500	151600	123900	48800	35860	34720	113400	116600	124600	119200
Com_333_neg	Gingerglycolipid B	C33H58O14	678.805	12.02	Glycerolipids	"88168-90-5"	13950	22440	11680	19580	3514	17390	17510	6146	12240	10770	28670	25590	54120	42360	26720	39650	25870	25930	150200	161500	226500	38110	60780	25100	24840	51040	25560	183300	176000	160100	102700	47520	68940	62590	92000	85880	171700	247900	194300	62200	98570	55550	60750
Com_334_neg	Stevioside	C38H60O18	804.87	8.29	Terpenoids	"57817-89-7"	8462	12130	11250	2067	2454	894	1429	2905	2625	4161	2985	2394	6901	5747	6039	2457	2467	4025	5822	7625	8052	5494	7386	6263	1346	2227	3257	2857	2880	4179	3355	2673	2005	1551	2735	2680	3703	2957	1353	2583	2022	3342	2544
Com_335_neg	Rutin hydrate	C27H30O16.xH2O	610.52	6.36	Flavonoids	"207671-50-9"	1055000	964100	883000	9890000	8665000	13470000	410900	6478000	2226000	3179000	3026000	2303000	9374	12220	19930	43620	134200	35880	10190	10190	10600	6523	10180	13830	3667	4075	3668	142400	84410	50630	55050	64190	30390	20790	19900	21090	170800	172100	170900	188700	187700	208900	24300
Com_336_neg	2-Acetylpyrazine	C6H6N2O	122.12	7.4	Carbonyl compounds	"22047-25-2"	98930	159900	114100	152500	115900	165100	124800	137300	107800	187200	185100	152800	99750	182100	124200	144800	140000	171100	147300	144000	195400	99810	134400	147900	164900	101600	143000	184200	124100	189900	131600	97130	122400	74440	108400	120500	149900	139900	142300	159100	86700	129800	148900
Com_337_neg	L-Rhamnose monohydrate	C6H14O6	182.17	0.98	Carbohydrates And Its Derivatives	"6155-35-7"	34390	41810	22110	43440	30240	39010	20080	23990	21850	12250	16650	9095	29170	25260	24390	14090	12640	16320	55090	47990	64510	19210	21300	19940	12820	15350	12580	68110	73560	72380	38820	40560	38180	19780	16580	12380	109800	92280	98970	66880	58250	65330	35150
Com_338_neg	Licochalcone A	C21H22O4	338.4	11.087	Chalcones and dihydrochalcones	"58749-22-7"	47700	156200	45040	14354	7742	15272	12181	14132	16514	12815	3085	4537	24400	40970	36200	9987	5203	3123	62500	44660	52000	26390	50630	11380	2770	18410	3830	34480	18530	51200	24680	1195	2412	13650	9328	20040	3531	12090	6329	15976	6048	13949	1359
Com_339_neg	N alpha-Acetyl-L-glutamine	C7H12N2O4	188.08	7.4	Amino Acid And Derivatives	"2490-97-3"	4061000	4010000	4232000	2626000	2719000	2530000	3197000	2326000	3244000	2747000	2709000	2537000	8489000	8120000	10850000	5042000	4884000	5235000	7756000	8993000	10110000	6385000	5162000	4941000	5453000	4617000	3942000	5091000	4842000	4440000	5008000	4432000	5038000	3960000	4045000	4377000	3974000	3994000	3660000	4599000	4626000	4642000	3565000
Com_340_neg	Isomaltulose	C12H22O11	342.116	0.97	Carbohydrates And Its Derivatives	"13718-94-0"	2702000	3467000	1879000	7215000	5560000	6724000	2134000	5455000	3548000	3081000	2080000	3011000	1313000	1116000	1276000	926300	1048000	785400	1376000	1503000	1495000	1005000	956600	1179000	996100	968600	1087000	1056000	1734000	2227000	1104000	1172000	1247000	1117000	1150000	1155000	4771000	4423000	5180000	1623000	1500000	1422000	1567000
Com_341_neg	4-Methoxycinnamic acid	C10H10O3	178	8.56	Cinnamic acids and derivatives	"830-09-1"	13620	12140	15950	8958	6794	5056	17560	18040	16940	11970	14280	6902	8322	3156	7634	5455	6356	6029	14810	14650	8341	3520	5601	6200	5403	6935	6435	6062	2047	6159	7483	4995	5534	4171	5153	4740	4411	4724	3073	9049	4614	6740	5001
Com_342_neg	Diosmetin	C16H12O6	300.26	8.911	Flavones and Flavonols	"520-34-3"	3920	1304	4273	4210	4071	4258	5018	6325	5968	4682	5476	2886	9154	9947	8341	3941	3776	3183	20740	15860	20460	3643	3947	3742	4284	2720	2404	10020	12460	8132	5331	2303	6924	2162	3121	1577	4177	1463	2861	1769	4565	2368	2263
Com_343_neg	Salidroside	C14H20O7	300.304	5.089	Glycosides	"10338-51-9"	4140	7869	3528	15460	5890	18160	4493	7249	5357	1993	8542	6413	7947	7627	7628	5573	5023	6454	23760	25140	23220	1534	5024	5900	6067	4614	4872	10110	7662	8793	6591	4325	2273	3781	6729	3735	9580	15870	11470	2671	3126	5492	3621
Com_344_neg	Guanosine	C10H13N5O5	283.24	2.772	Nucleotide And Its Derivates	"118-00-3"	8582	6035	7790	5604	4298	6405	2440	714	1399	2712	486	205	3523	2248	2223	2638	202	2898	20410	19330	20200	3330	1608	3345	2868	2300	3135	10990	11830	10010	2677	2090	4156	245	3363	159	9285	8075	6092	5493	7001	4413	1635
Com_345_neg	Lariciresinol-4'-O-glucoside	C26H34O11	522.211	6.56	Lignans	"143663-00-7"	22120	28960	16270	38930	14280	29010	26290	52740	38470	57250	71770	52680	14510	14100	10560	25110	23740	25080	20860	35960	31420	11000	18010	21590	24200	14080	23240	26060	24020	19090	20890	18430	21110	22430	24210	25060	29180	26830	25720	36280	46040	31100	34200
Com_346_neg	9S-Hydroxy-10E,12Z-octadecadienoic acid	C18H32O3	296.235	12.61	Fatty Acyls	"15514-85-9"	2825000	4267000	1670000	19270	13160	22360	45490	26290	38110	21550	43970	36980	1807000	1730000	2386000	427800	276300	261900	1152000	1792000	2123000	483100	368800	361300	187600	180600	224100	242600	209400	304100	205700	129000	167500	95910	130600	131400	94460	143800	69320	114300	169500	89800	76280
Com_347_neg	(7S,8S)-DiHODE	C18H32O4	312.23	1.3	Fatty Acyls	"143288-65-7"	192400	227100	217600	436200	386500	467300	421200	436300	393700	367600	415600	455000	144600	140900	175100	24800	27660	42630	314800	329400	288500	171800	178300	189800	36050	27770	22070	376500	363700	402800	385100	400400	478200	193800	227200	173600	385100	449700	402400	459900	434600	402200	385500
Com_348_neg	Harpagide	C15H24O10	364.345	4.603	Terpenoids	"6926-08-5"	6252	4010	7283	3104	1291	3958	3990	3196	4563	3230	4985	2147	8239	6245	5482	3899	6837	5387	6472	7270	6259	4414	2229	1796	5623	3461	3931	5297	4345	4077	3833	2945	3676	2849	3357	2613	3501	3422	3267	4395	2782	2901	3045
Com_349_neg	Aurantio-obtusin	C17H14O7	330.289	9.734	Quinones	"67979-25-3"	13610	10930	11370	6769	4209	6391	5259	5266	5931	7875	8992	6202	8756	12670	14680	2436	2926	2598	20710	32000	33870	10990	6325	4548	3459	3245	2923	6001	9867	8434	4458	2105	6475	2435	3563	1939	2916	4702	3677	4493	5311	3893	2426
Com_350_neg	Neochlorogenic acid	C16H18O9	354.309	4.879	Polyphenol	"906-33-2"	5092	3961	1062	113200	165700	148900	5883	59270	14360	39590	23740	17820	6554	6437	6853	9581	6971	1330	1546	3147	1345	6052	1933	3819	9534	6058	6822	6291	8193	2199	2259	1356	6120	4696	2884	3425	4632	2749	1779	1116	2764	2752	2093
Com_351_neg	Chrysin	C15H10O4	254.24	1.284	Flavones and Flavonols	"480-40-0"	4497	3032	4482	14840	5754	9461	1696	987	1234	2866	2054	2046	1608	2234	793	2034	2037	656	2592	5626	3875	819	819	1637	3624	2738	1227	6876	6975	4192	4113	5356	3586	421	821	827	4132	8513	11990	3717	1235	958	4116
Com_352_neg	Astragalin	C21H20O11	448.38	7.24	Flavones and Flavonols	"480-10-4"	194600	213800	170000	1510000	1282000	1716000	209700	367700	333000	242100	214000	163000	21070	27050	20620	4729	3440	10228	280900	278500	265400	24940	27520	30100	2146	5151	3004	400700	388000	359600	36970	43880	27500	6882	6023	3008	380900	409600	282200	59670	54120	48510	11150
Com_353_neg	D-Xylonic acid	C5H10O6	166.048	0.9	Organic Acid And Its Derivatives	"526-91-0"	1727000	1756000	1695000	2568000	1501000	2511000	759100	777500	812600	927800	907600	873500	1210000	1221000	1214000	1213000	1168000	1501000	1747000	1709000	1765000	903400	835700	938500	1240000	1141000	1137000	2284000	2267000	2349000	1275000	1285000	1331000	1226000	1390000	1351000	2898000	3114000	3153000	1517000	1561000	1484000	1679000
Com_354_neg	Pantetheine	C11H22N2O4S	278.13	5.84	Vitamins	"496-65-1"	62250	73120	60390	4073	3779	10510	36130	42650	43090	33820	35760	32860	43180	44730	42280	29500	27720	37300	8641	17930	20100	56980	44580	71440	39570	19710	32880	11840	10650	16730	54840	43500	59030	20840	37630	25980	13750	7132	8030	64870	62450	40190	21250
Com_355_neg	4-Ethylphenol	C8H10O	122.16	7.42	Benzene and substituted derivatives	"123-07-9"	110800	109900	97150	143300	119100	65120	145000	119600	116300	141000	147000	64800	86080	129400	78310	124400	143200	152900	61560	131600	190500	132000	157100	77690	145200	112400	71870	125000	113500	137600	51920	121600	91720	83320	180300	102900	55980	115900	112600	74370	136000	142800	125400
Com_356_neg	Catechol	C6H6O2	110.11	5.29	Benzene and substituted derivatives	"120-80-9"	94510	112200	117400	8018	4622	9389	44770	48890	36580	49580	41410	48090	26840	22270	31640	7863	7541	9711	6901	10620	9870	22490	33180	40340	8664	15650	7650	5601	7891	1958	27840	16170	23640	9329	13310	4877	8003	4646	4983	45230	53100	37660	13950
Com_357_neg	Chrysoeriol O-acetylhexoside		504.1	4.81	Flavonoids		5670	4756	5933	62310	21450	48850	13049	14194	13820	1698	1652	4522	6630	2848	3764	58380	54440	67530	44590	55300	52260	4499	8083	3568	75940	46210	53960	71690	97680	71850	2140	3582	2365	18970	22370	18120	75130	86840	58180	4488	26327	1658	1657
Com_358_neg	D-Erythrose 4-phosphate	C4H9O7P	200.084	1.08	Carbohydrates And Its Derivatives	"585-18-2"	2090000	2424000	1477000	1655000	956600	1949000	954300	998500	1054000	758900	746500	838100	516900	717000	804200	624200	607700	851200	2241000	2114000	2509000	782700	1137000	985000	731200	629300	523100	1907000	2173000	2052000	676800	925300	649600	373400	513200	379200	2078000	2402000	2417000	860100	784700	761100	401700
Com_359_neg	D-Fructose 1,6-bisphosphate	C6H14O12P2	340.116	0.88	Sugar Acids And Its Derivatives	"488-69-7"	198500	193100	194700	51470	17010	57510	120000	97790	141200	76440	106700	97710	200100	195700	207700	119900	114100	139100	171200	269200	261000	154900	150100	200300	130100	102600	108300	237100	219000	190200	163200	112800	160500	67660	124600	63200	71360	78900	53160	225800	206900	177400	53900
Com_360_neg	Guanosine 5'-triphosphate	C10H16N5O14P3	523.18	0.9	Nucleotide And Its Derivates	"86-01-1"	15900	14720	48270	9802	4646	10870	9262	15130	7625	10820	10180	19620	21420	38490	30400	8664	14320	3792	49520	27340	29660	11700	20270	19700	4077	9914	21170	35750	27350	43370	19980	13500	29640	5030	21750	16230	24940	31100	13420	33600	40130	14500	17420
Com_361_neg	Lactic acid	C3H6O3	90.078	1.48	Organic Acid And Its Derivatives	"50-21-5"	747100	640000	683900	62610	106700	47470	218300	61540	179900	257100	210600	118900	1160000	505900	629200	1115000	510800	858600	136600	248000	140400	518500	467900	609100	1397000	665100	1298000	228200	1378000	122000	383800	971300	345100	755100	577200	805700	102800	80920	64480	238900	241200	360100	279600
Com_362_neg	6-Phosphogluconic acid	C6H13O10P	276.135	0.91	Carbohydrates And Its Derivatives	"921-62-0"	273100	213200	253600	124100	68470	139100	73550	55740	80620	49800	43420	719800	172500	199100	113600	169800	142400	161700	423100	351500	254900	187400	158200	200200	130700	95690	128900	176800	128600	147700	87190	90600	46490	59320	83580	72260	155700	146700	103100	107500	93620	110100	66190
Com_363_neg	2,5-Dihydroxybenzoic acid	C7H6O4	154.12	5.44	Benzoic acids and derivatives	"490-79-9"	38730	35090	46220	3926	6666	7725	18210	11200	17930	10750	22720	15370	9738	9998	5666	7768	4131	3223	12750	16020	11900	6185	7267	16400	5212	9272	2254	10720	4323	4430	8389	4040	11480	3790	3235	3947	7115	6265	3103	16700	15640	19180	14180
Com_364_neg	D-Arabinose 5-phosphate	C5H11O8P	230.11	0.9	Pentose phosphates	"13137-52-5"	1858000	1839000	1703000	773000	440100	742200	716000	849100	761800	537000	570800	512700	1376000	1496000	1470000	1241000	1386000	1314000	2202000	2217000	2281000	1217000	1158000	1341000	1324000	1320000	1082000	1278000	1292000	1131000	882700	939700	920600	807000	1047000	924900	1023000	1238000	1220000	1007000	975400	922600	943200
Com_365_neg	dUMP	C9H13N2O8P	308.182	0.92	Nucleotide And Its Derivates	"964-26-1"	455500	532500	537000	1132000	386500	1264000	301100	211200	255800	277800	243100	260500	1048000	732200	1057000	2532000	2501000	2497000	974900	834900	698800	2224000	2487000	1892000	4745000	5698000	5459000	2968000	2645000	2073000	2692000	2746000	2505000	5389000	6145000	5973000	3051000	3193000	2894000	3394000	3116000	2659000	8009000
Com_366_neg	Deoxyribose 5-Phosphate	C5H11O7P	235.084	0.82	Pentose phosphates	"102916-66-5"	27200	18740	20740	35610	25950	54970	19900	22800	14060	17950	21930	21770	24690	14170	18367	15100	14960	12540	51500	67020	75580	11080	14410	15660	12590	21790	9434	53480	51210	33590	12210	44660	18050	14290	16480	20410	50420	40470	40200	34110	13980	38580	12610
Com_367_neg	4-Hydroxy-L-Glutamic Acid	C5H7NO5	161.11	18.53	Amino Acid And Derivatives	"2485-33-8"	36090	39810	38380	26010	40410	31590	17500	28750	40860	28840	44840	38150	37920	28760	30580	33120	34270	30100	42810	32200	39880	34500	33400	37260	39540	44650	17040	41090	43920	28800	35970	38620	29520	21370	37770	33020	36550	32030	36850	16300	39830	26840	42080
Com_368_neg	D-Galactonic acid	C6H12O7	196.155	0.92	Organic Acid And Its Derivatives	"13382-27-9"	1406000	1236000	1554000	3678000	1959000	3368000	1869000	1728000	1906000	923100	968100	950200	1610000	1494000	1367000	1414000	1183000	1658000	3152000	2847000	3170000	1001000	1121000	1311000	1131000	973700	997000	4185000	3887000	3710000	1926000	2255000	1868000	895500	1068000	1040000	5827000	6350000	6092000	3144000	3182000	3047000	1284000
Com_369_neg	Isovanillic acid	C8H8O4	168.15	6.1	Benzoic acids and derivatives	"645-08-9"	32130	26080	32200	2814	2235	5621	7970	9278	15210	7408	11060	4874	24470	22990	17620	12940	12870	18310	41510	33980	39650	17460	18850	27590	14920	9450	10600	25540	18600	21690	29820	24310	26690	15850	16620	16030	16140	9708	8821	31810	25810	34680	16090
Com_370_neg	Hydroferulic acid	C10H12O4	196.2	6.74	Phenylpropanoids and polyketides	"1135-23-5"	29890	24610	32470	30580	9059	24220	32540	33480	22510	28040	32200	29890	27910	27360	19260	12440	15780	18910	81880	107000	83040	34630	23250	27750	20400	10240	16200	71780	50830	62640	52120	57560	57990	18120	22030	24610	65130	31360	33190	86740	84450	77980	42710
Com_371_neg	Fructose	C6H12O6	180.16	0.92	Carbohydrates And Its Derivatives	"57-48-7"	1639000	1126000	918700	1720000	1683000	1506000	464200	254400	315600	203100	133600	200900	1214000	1285000	1034000	1107000	1756000	1167000	2873000	1478000	1954000	1050000	1011000	1295000	793200	2101000	747800	1702000	2633000	2045000	711300	641600	531100	464000	797900	510700	2085000	2800000	2820000	1044000	1252000	922800	703500
Com_372_neg	Galactinol	C12H22O11	342.116	0.99	Carbohydrates And Its Derivatives		3647000	5022000	4978000	1075000	965900	921100	2546000	2740000	3153000	3294000	3946000	3909000	3064000	2594000	2973000	2368000	2184000	2675000	2146000	1988000	2195000	2457000	2629000	3015000	2244000	2141000	2371000	1416000	1689000	1296000	2526000	2410000	2885000	2231000	2336000	2336000	2161000	1738000	2042000	3963000	3634000	3756000	3642000
Com_373_neg	Ribulose-5-phosphate	C5H11O8P	230.02	0.93	Carbohydrates And Its Derivatives		1168000	1052000	1042000	466100	239000	483400	716000	719100	831500	513500	665800	586800	902900	999000	1014000	607900	578100	722600	1400000	1493000	1629000	977800	828800	1116000	648000	670800	522200	1250000	1256000	1050000	1350000	1203000	1276000	503600	753300	608200	1262000	1264000	1113000	1939000	1814000	1713000	954500
Com_374_neg	Sucrose	C12H22O11	342.116	0.98	Carbohydrates And Its Derivatives	"57-50-1"	1644000	1783000	1262000	2048000	2936000	2061000	1062000	2480000	1544000	1682000	1598000	1507000	687300	790000	536300	467300	635800	587800	648600	896900	686700	690000	632500	721400	555500	662700	518400	465000	721300	872600	667500	532400	765400	503900	623600	498400	1998000	2176000	1951000	1047000	857300	829900	826100
Com_375_neg	D-Glucose 1-phosphate	C6H13O9P	260.136	0.86	Carbohydrates And Its Derivatives		3478000	3100000	4722000	1230000	639600	1050000	972000	941700	1098000	707800	777000	668900	4312000	3819000	2995000	4316000	4035000	4215000	3066000	3032000	3281000	2586000	2086000	2408000	3417000	2989000	3825000	4961000	5140000	4765000	1871000	1464000	2152000	2239000	2554000	2187000	3718000	4382000	4077000	2005000	2385000	2020000	1789000
Com_376_neg	Phosphoenolpyruvic acid	C3H5O6P	168.042	1.04	Organic Acid And Its Derivatives		137200	228800	104300	340700	82710	330900	189900	148400	188700	34110	57640	70080	45010	45670	66430	38520	37550	16230	1472000	1928000	2049000	89880	103300	85980	37700	40690	42880	967400	1251000	1043000	48630	58390	50480	27210	34440	21420	1213000	1478000	1626000	58100	60430	53420	46370
Com_377_neg	(+)-Dipentene	C10H16	136.234	18.28	Terpenoids	"5989-27-5"	474600	473800	479100	468000	201400	470700	452000	447400	453000	457300	469000	458000	452900	185600	441400	457600	454200	454500	447900	456600	447400	459500	462000	449200	448600	462700	462100	453600	444200	448700	441900	441000	437900	437700	434900	431600	441800	447400	446900	454500	447600	445900	190500
Com_378_neg	L(-)-Malic acid	C4H6O5	134.022	1.08	Tca Cycle	"636-61-3"	96910000	91170000	98020000	185100000	129800000	183700000	182500000	166500000	181600000	173600000	210600000	182300000	83460000	83220000	82940000	52630000	54350000	58310000	134500000	141500000	142800000	87660000	86550000	93830000	54070000	48800000	47350000	261000000	256300000	250000000	196400000	204900000	206100000	103700000	112700000	97890000	292600000	296800000	283900000	326100000	319100000	320400000	233500000
Com_379_neg	S-Methylglutathione	C11H19N3O6S	321.1	1.12	Amino Acid And Derivatives	"2922-56-7"	5669	4968	6471	16710	15850	10510	24500	15170	12020	23890	23120	22700	5729	11450	7645	4618	7242	8674	12230	6305	12700	8247	9784	8946	5878	6141	12860	23910	18950	26360	16750	23760	11970	10550	13850	8559	26200	24620	20200	27440	28580	33940	23180
Com_380_neg	4-Hydroxy-3-methoxycinnamic acid	C10H10O4	194.058	5.34	Cinnamic acids and derivatives	"537-98-4"	3402	2704	6529	1409	4325	5447	5852	2996	1239	6418	11030	8612	6464	4178	2256	7332	2262	16870	4940	5236	3232	1733	6611	4487	15950	7260	9309	5840	5927	4653	5988	4891	4545	7475	3530	3742	4171	4488	3657	6882	5861	6402	4144
Com_381_neg	N-[(-)-Jasmonoyl]-(L)-Isoleucine	C18H29NO4	323.401	9.96	Phytohormones		10040	6403	7278	473	466	447	2342	1039	4951	1698	4587	1621	307	296	4159	530	153	308	2928	2063	3707	4022	3104	3256	307	3045	2920	7216	7893	5899	6775	6115	9149	2165	3378	1805	3109	2560	4149	1807	6817	5401	3086
Com_382_neg	3-N-Methyl-L-histidine	C7H11N3O2	169.181	0.85	Amino Acid And Derivatives	"368-16-1"	13870	11260	15210	30460	15540	36680	8459	14810	17320	5329	8999	5659	15640	13320	14180	14310	4988	10810	16530	20080	18350	7824	10890	7754	12660	6928	8359	27740	20700	24640	12100	9838	9787	8931	12640	9786	24500	28490	27900	17700	20220	13750	16630
Com_383_neg	3-Hydroxypropanoic acid	C3H6O3	90.032	1.21	Organic Acid And Its Derivatives	"503-66-2"	10780	23910	20040	30680	33750	27420	9101	6025	16167	16386	12182	11224	27720	25880	20140	12890	25010	24690	27240	62030	30380	15240	17790	23770	13190	5934	18840	21910	30210	28310	9135	9649	8428	9033	14467	14050	55510	59420	46260	9788	15500	16810	13040
Com_384_neg	1,5-Anhydro-D-glucitol	C6H12O5	164.069	1	Alcohols and polyols	"154-58-5"	101900	94490	97230	75740	43170	82910	107000	56030	65150	55760	64340	39800	81230	72890	92290	47640	59290	57900	137900	149200	154200	49490	66630	63830	65160	50970	46980	138200	147600	149000	120500	114800	114000	61000	63210	49930	177000	171200	173200	144000	149400	161900	78880
Com_385_neg	5-oxoproline	C5H7NO3	129.043	1.63	Amino Acid And Derivatives	"149-87-1"	169400	144300	181000	18640	9955	20050	27610	19770	21630	20450	20550	15480	208800	72440	67750	155300	69860	76770	24050	24330	25060	48910	39340	75260	139800	49710	143100	32870	378800	31720	46600	51110	38440	27870	32620	55810	32380	27900	22940	35890	41060	38060	26730
Com_386_neg	Dihydrokaempferol	C15H12O6	288.063	5.75	Flavonoids	"480-20-6"	4979	13760	2194	24730	21380	42560	6718	13210	11920	22830	17570	25070	4510	6040	830	7965	4108	5028	10658	11073	3661	1180	3835	2197	833	5182	785	6696	7134	5723	5226	5296	1314	1818	1433	1451	2201	5169	4372	1408	3037	4422	3748
Com_387_neg	Usnic acid	C18H16O7	344.32	13.8	Organic Acid And Its Derivatives	"125-46-2"	3551	4490	5049	3650	4190	3698	4521	4108	4280	4407	3529	4220	4490	4275	4267	4935	3788	3594	4664	4876	3758	4615	4068	4648	5490	4408	4641	4578	5856	4496	3874	4611	4039	4450	5492	6148	5078	4573	5295	4799	4713	4386	4968
Com_388_neg	Cedrol	C15H26O	222.37	10.67	Terpenoids	"77-53-2"	14150	14980	21530	21080	21200	23870	19060	21490	22020	19190	12340	14980	18420	17780	27160	17530	21150	20180	18610	20500	21240	19310	16920	24090	18100	22980	18730	21780	19540	27230	23460	17510	19660	23120	19420	22410	27410	19020	23390	21750	21460	20580	24620
Com_389_neg	Maltose	C12H22O11	342.3	1.01	Carbohydrates And Its Derivatives	"69-79-4"	108700	111400	97750	176000	236300	198700	75230	154600	86940	107400	100300	83490	75230	60410	52360	43190	45480	42910	95170	84390	87860	51270	47570	52870	40910	50810	46540	94780	96850	114200	44580	47760	63790	42300	47750	46230	221400	188700	226400	65170	73720	92420	74890
Com_390_neg	Xanthoxyline	C10H12O4	196.2	10.97	Carbonyl compounds	"90-24-4"	9926	13490	12300	11730	8241	9772	10530	8504	10130	11290	10720	9562	8947	12680	16010	11680	11070	14030	12120	11320	13690	11110	13090	12000	14460	9657	12180	12390	8722	10860	10690	8012	11800	11150	12020	13130	11440	13450	11290	9010	10720	13830	10690
Com_391_neg	p-Coumaric acid-4-O-glucoside	C15H18O8	326.1	5.55	Phenolic acids	"117405-48-8"	1096000	778600	934500	502300	326100	541800	560200	549600	612400	531500	659600	525800	85740	107700	127600	60700	52250	68430	417400	619000	564300	198200	261300	300000	65700	53360	49080	274300	277600	225500	383100	368400	360300	58420	84640	66880	418400	425400	398500	692400	645300	616600	221100
Com_392_neg	Lumichrome	C12H10N4O2	242.233	5.93	Alkaloids and derivatives	"1086-80-2"	6183	2101	7233	3307	2132	1904	3641	6057	2056	6114	4602	5252	10930	8713	13790	5101	3994	5459	16730	9523	19210	9453	5587	7267	8561	11110	8019	14750	13300	8743	12060	5674	8447	2538	5095	7947	12790	14930	8622	13780	10940	7571	6959
Com_393_neg	Pinoresinol-glucoside	C26H32O11	520.526	7.23	Lignans	"69251-96-3"	46360	41980	42390	54110	21370	63440	38730	32050	63660	43830	37610	52290	22440	23160	20790	16160	13570	22200	67680	59190	71980	27280	25670	28700	21160	24340	26970	46870	40720	56970	28210	31140	41330	23980	29160	17940	33820	50870	43500	59640	52560	54500	8990
Com_394_neg	Propylparaben	C10H12O3	180.2	9.67	Benzene and substituted derivatives	"94-13-3"	19370	10900	16260	11030	14650	13200	15090	14530	13310	11020	16480	17110	17910	15610	14760	15800	17910	16870	13060	12430	12440	13370	12460	13910	13710	19050	18790	14280	11790	16140	13010	13030	13700	11240	13590	12580	13700	12120	15380	13750	11260	14490	14890
Com_395_neg	Bisdemethoxycurcumin	C19H16O4	308.328	6.53	Phenylpropanoids and polyketides	"33171-05-0"	5834	5482	6260	4238	4306	7845	4412	1567	8605	3736	6811	2195	3537	5167	3329	2786	3701	3196	13870	19170	13010	2211	3828	4009	3422	2012	2879	12670	12570	9744	7026	6699	4668	1965	3785	2272	9810	7607	8114	6677	5590	8081	2157
Com_396_neg	Isomucronulatol-7-O-glucoside	C23H28O10	464.469	6.53	Flavonoids	"94367-43-8"	76660	88060	80680	354900	397700	439600	19990	160900	67050	123100	101600	67510	25810	18560	17160	4182	2980	6114	24020	33540	32070	11400	9973	33660	6051	7623	6535	49850	41110	28700	11400	27630	4400	2164	3094	2965	57260	37830	34530	22460	29310	32710	9607
Com_397_neg	N-Acetyl-L-Tryptophan	C13H14N2O3	246.1	6.72	Amino acids and derivatives	"1218-34-4"	9531000	9439000	9330000	464000	336100	525200	6507000	9120000	7073000	4079000	4151000	4454000	3522000	3758000	3910000	2005000	1767000	2153000	1613000	2084000	1750000	4309000	4577000	5081000	2394000	1763000	1861000	611700	637100	509600	3441000	3271000	3832000	1579000	2323000	1792000	482500	356500	352400	4017000	3256000	3320000	1819000
Com_398_neg	3-O-p-Coumaroylquinic acid	C16H18O8	338.1	5.92	Phenolic acids	"87099-71-6"	3943000	4672000	4213000	2034000	1110000	2080000	1108000	1440000	1286000	383200	394700	324900	45430	167100	307700	511803	454402	575987	426100	562500	494400	123600	379300	375700	452374	460272	396679	758000	762300	644900	251300	387400	251800	213515	262380	238760	1409000	1319000	1187000	599000	505000	561400	32060
Com_399_neg	Rosmarinic acid-3'-O-glucoside	C24H26O13	522.137	6.54	Phenolic acids	"910028-78-3"	28640	21470	33070	37890	22650	40790	37370	54040	40360	79010	71720	78700	13640	16750	16170	26960	19790	27190	37310	30240	46960	19780	19710	27730	24510	23750	24210	43020	38460	30460	18280	25890	23730	24210	31260	31650	34830	30880	31560	61580	59370	48390	29720
Com_400_neg	2,6-Dimethyl-7-octene-2,3,6-triol	C10H20O3	188.141	7.31	Alcohols and polyols	"73815-21-1"	693800	665800	707500	436700	439300	392800	565400	409200	496900	444000	467600	500500	1400000	1349000	1761000	854900	818800	766500	1172000	1409000	1606000	1025000	819800	819300	828200	752400	631100	777100	749900	702100	737500	722900	790200	604200	677800	734600	655400	642200	615400	707600	878400	704900	588400
Com_401_neg	L-Citramalic acid	C5H8O5	148.037	1.46	Organic Acid And Its Derivatives	"6236-09-5"	671700	496600	580500	2525000	1364000	1916000	3054000	3060000	2342000	2300000	2869000	2514000	267600	230800	304200	27560	24020	39500	920600	1068000	1024000	301400	363100	331400	42310	24230	13130	2214000	2229000	2129000	1818000	1792000	1722000	271100	321000	276200	1946000	2049000	1740000	2699000	1766000	2328000	1322000
Com_402_neg	12(13)-EpOME	C18H32O3	296.235	12.61	Fatty Acyls	"6799-85-5"	2794000	4193000	1652000	23740	16840	21570	42560	24430	44410	21550	39380	34080	1814000	1702000	2343000	435800	266800	272000	1103000	1766000	2128000	485900	365500	361600	196600	181800	214200	241400	198500	301900	210100	136600	167700	91500	126700	131200	96850	143600	63540	108400	170300	93580	68900
Com_403_neg	Sebacic acid	C10H18O4	202.248	8.111	Organic Acid And Its Derivatives	"111-20-6"	643000	753300	334200	230600	235700	233600	217000	248300	295500	244000	244300	253600	466100	492200	662000	286500	268900	273100	299800	362900	391800	281300	289800	260400	337900	285900	263000	262900	263800	263000	278500	279700	266400	270100	272400	293800	236900	247800	266600	250000	242600	256800	247200
Com_404_neg	2-Methylpentanedioic acid	C6H10O4	146.14	5.012	Organic Acid And Its Derivatives	"617-62-9"	82830	49010	56380	51070	54200	28000	42180	101200	133100	44960	57820	28070	137800	46800	52660	74400	49110	89680	63210	64960	72360	65380	34580	69790	242900	73770	87380	38700	83440	52450	53350	85820	50580	71920	63270	238600	66710	46700	24670	31400	50840	61400	53250
Com_405_neg	Swertiamarin	C16H22O10	374.34	5.578	Terpenoids	"17388-39-5"	5586	7702	8780	4565	1719	3443	5939	7199	4454	5349	3284	2307	4008	3855	3145	708	1430	349	5222	11940	6858	5748	6064	5946	1118	3023	1050	1895	6001	6365	7400	7342	5143	349	2864	1076	1196	3937	3949	4610	1730	3219	1764
Com_406_neg	Isoquercitrin	C21H20O12	464.38	6.596	Flavones and Flavonols	"482-35-9"	207700	209000	193300	1078000	821600	1174000	38610	445500	161000	303700	270200	149300	50590	57770	42650	9238	8606	12300	68040	82290	71620	21910	29460	70580	11420	4347	7033	90870	93570	69500	33910	63700	21900	7456	7653	12310	98890	100400	76950	52900	41880	71230	23320
Com_407_neg	Dulcitol	C6H14O6	182.17	0.897	Carbohydrates And Its Derivatives	"608-66-2"	11740	19040	8670	12730	19530	15810	12980	9331	7846	11120	5362	8881	7976	7514	4452	8084	10130	8112	17850	13280	16760	8083	5316	8525	10110	8802	10940	16280	15040	13420	5175	14490	12420	16100	9849	10980	12970	8875	12710	3736	11450	8153	12470
Com_408_neg	Quinic acid	C7H12O6	192.17	0.998	Alcohols and polyols	"77-95-2"	10640000	9854000	12510000	7593000	4944000	7632000	7906000	6183000	6319000	2970000	3629000	4018000	4327000	4475000	4276000	2143000	2156000	1873000	18420000	16460000	18400000	5040000	5142000	4310000	2190000	2363000	2321000	15390000	15890000	15720000	10460000	10790000	10820000	4138000	3905000	4104000	22020000	21870000	22600000	20170000	20550000	19470000	10170000
Com_409_neg	Astragalus polyphenols	C20H22O9	406.38	6.588	Glycosides	"82373-94-2"	7962	9120	6085	150500	71520	169100	19160	33210	21850	12660	10570	7975	16760	23400	23270	9181	15330	14790	88200	78190	86120	35890	41880	48120	22690	12700	13050	205700	175900	195700	87220	106000	76610	28620	37910	22680	271600	250700	236000	81900	75150	74080	20250
Com_410_pos	L-Alanyl-L-leucine	C9H18N2O3	202.251	4.45	Amino Acid And Derivatives	"3303-34-2"	1042000	715300	1547000	37850	117162	33340	86480	32400	55120	22600	36300	31630	1062000	868700	633300	232700	258700	188900	1375000	1462000	1319000	492700	313900	395300	233900	166700	188400	676700	566200	466700	312900	236900	366400	172300	182400	163400	368000	319900	291800	382600	450500	349400	283500
Com_411_pos	L-Saccharopine	C11H20N2O6	276.286	1.03	Amino Acid And Derivatives	"997-68-2"	580000	653800	563600	218800	145300	217600	254700	341400	303900	314800	266600	288200	306200	359200	378000	210800	267700	279900	511700	548300	478400	275700	285800	286600	303300	212900	201000	306200	297900	296100	252300	228100	238400	147200	115200	123400	224100	259000	227700	272700	305600	230300	157100
Com_412_pos	L-Methionine sulfone	C5H11NO4S	181.21	1.84	Amino Acid And Derivatives	"7314-32-1"	69880000	61860000	64890000	1719000	928700	1564000	2819000	3851000	3165000	1320000	1617000	1249000	28580000	25830000	30540000	14880000	15510000	18010000	7128000	9086000	7449000	20190000	24390000	27790000	11880000	9888000	11910000	4609000	11990000	3978000	6087000	5110000	4796000	1869000	1964000	2120000	3758000	3672000	3319000	6333000	5831000	5089000	2591000
Com_413_pos	Leu-Pro	C11H21ClN2O3	264.749	9.91	Amino Acid And Derivatives	"87178-63-0"	47470	59140	43220	49330	44620	51060	41730	65380	63970	50560	54570	48070	47990	54090	50670	47250	62940	50390	52400	60190	55760	57260	44070	51750	57720	44700	47460	53550	55550	51310	53780	47830	41610	61310	50910	45890	53650	41960	51750	67800	45000	46730	42200
Com_414_pos	L-Cysteine-glutathione gisulfide	C13H22N4O8S2	426.466	0.96	Amino Acid And Derivatives	"13081-14-6"	1622000	1613000	1077000	201700	161200	239000	220900	173700	179400	148100	226000	177500	1144000	1350000	1688000	280600	335700	380400	879600	983000	894000	571100	498700	637100	135400	177000	203600	424500	446400	461900	300500	383600	372200	117300	100400	121400	427500	516800	398300	717400	800600	873400	415900
Com_415_pos	L-Cystathionine	C7H14N2O4S	222.262	0.84	Amino Acid And Derivatives	"56-88-2"	37650	38360	47160	316200	217700	324500	74830	78280	102700	57200	74630	66880	19050	51670	33780	20780	14710	14270	161600	118500	90010	39100	37570	20190	16390	11860	7436	408400	395700	380300	153200	198000	181300	55050	68170	78410	442400	520800	456500	187400	196200	188300	70680
Com_416_pos	Swainsonine	C8H15NO3	173.21	5.53	Alkaloids and derivatives	"72741-87-8"	185000	202600	212900	137500	95640	145600	68360	49300	47530	19270	49010	18790	51050	91230	61250	33040	21300	53580	303300	397200	382700	41820	69060	32840	108918	42861	56056	177400	131200	118000	30740	31550	22850	29116	30870	24160	102500	92560	78920	45460	47620	45700	31717
Com_417_pos	Threonyl carbamoyl adenosine	C15H20N6O8	412.35	5.08	Nucleotide And Its Derivates		234300	159200	229600	78140	44470	73060	165800	215000	171900	177000	148800	182600	72450	87740	124300	63710	61280	84120	221600	287300	322200	99020	106600	154200	50670	64870	83380	134200	129800	128000	145100	103900	103200	54430	105900	52500	79690	87230	56650	120000	117700	172400	59600
Com_418_pos	Tianshic acid	C18H37NO5	347.49	0.97	Fatty Acyls		19368	7801	33690	23340	6974	11680	27920	24630	16790	19230	27300	17320	10360	9818	15240	14530	16340	7103	13190	26586	7086	11910	8237	28580	13570	9984	36450	38270	6917	17300	18990	22280	38590	18250	36060	39790	18800	11600	28120	60010	26980	48920	19580
Com_419_pos	TBHQ	C10H14O2	166.22	11.73	Benzene and substituted derivatives	"1948-33-0"	751700	642700	583700	684200	596700	656800	618100	569700	554800	655100	563200	609100	671400	604400	612100	674900	642100	631100	678500	632400	607900	628300	575300	602800	582500	645400	626900	606100	522800	630400	565400	500600	577200	550400	549500	522700	630800	546800	569800	458800	584800	466400	494600
Com_420_pos	7-Ethylcamptothecin	C22H20N2O4	376.41	9.44	Alkaloids and derivatives	"78287-27-1"	733600	841200	638600	149711	132247	138957	81320	52330	110600	155491	166819	95130	589000	673000	736700	359200	225700	272400	450300	638800	732600	303400	357800	313100	380300	256700	252300	114300	172700	167400	243300	262500	158400	128700	172400	130200	75600	142300	69770	132700	125400	137700	98700
Com_421_pos	N', N''-Caffeoyl, feruloylputrescine			0.98	Amines		2278000	2855000	2388000	419600	284000	390600	392400	359500	400100	309800	365800	264300	2450000	3184000	3494000	685100	619100	636100	1539000	1685000	1505000	930700	907900	1089000	301000	302000	328400	749600	719700	695800	714600	871500	767400	203500	203300	234600	745600	940200	732600	1305000	1238000	1313000	426100
Com_422_pos	N', N''-Caffeoyl, p-cinnamoylputrescine			1.32	Amines		29557	29935	38656	23620	23040	19960	48620	12970	55810	29660	31930	32730	28660	29260	27366	22311	18670	22860	29470	14690	20240	21694	22083	23252	21434	21480	32514	36170	48190	37190	18080	37520	27990	20335	25474	20366	47690	42200	28764	18480	39780	42110	25520
Com_423_pos	N',N'',N'''-Di-p-hydroxybenxoyl, feruloylagmatine			6.7	Amines		54600	52910	77680	63490	85770	56450	66680	51020	41300	66550	48120	54080	62910	38980	66170	49330	61720	69400	78860	59300	66330	60800	67210	67970	80610	79840	75360	90790	64860	53650	70010	62860	50940	52950	70680	59430	60770	73190	64530	66940	73130	56190	56980
Com_424_pos	N',N'',N'''-Di-p-coumaroyl, sinapoylagmatine			5.7	Amines		439800	316200	308600	21921	4814	23720	68730	116000	72210	104400	46720	89470	53890	38900	66950	4423	7080	17570	6701	54412	8599	20280	81192	81810	10100	31770	9022	26759	45317	26348	32230	14330	12510	6802	5228	7871	28007	27279	5061	31010	40800	21320	16550
Com_425_pos	N',N'',N'''-Triferuloylagmatine			6.03	Amines		17730	33800	26070	11000	8637	3093	12380	30480	16910	42790	29260	35030	49030	41660	39480	24100	28960	46890	16930	19220	21540	34330	21080	66690	61890	42100	44760	8109	26648	22508	12310	35390	24428	11600	32610	9199	21155	23509	7904	11970	23477	11270	12130
Com_426_pos	Putrescine	C4H12N2	88.1	0.68	Amines	"110-60-1"	1214000	1147000	1246000	411700	479600	433000	317000	244400	203500	162400	178800	98190	772400	795800	920500	454500	392400	425300	1368000	1647000	1391000	497500	620000	523600	403900	423200	407500	547200	419000	382100	268800	248400	200400	206900	238600	220200	368000	372400	307100	281600	246300	222200	164500
Com_427_pos	1,5-Diaminopentane	C5H14N2	102.116	0.83	Amines	"462-94-2"	420100	395900	355600	20300	29880	12648	18310	14170	21170	35689	19106	6225	47830	35130	29620	41660	14550	25660	8073	31622	28000	14020	20340	14680	20720	15320	53310	12500	24240	18860	26825	10360	7061	23360	11140	6065	28790	19300	8678	15080	16800	20040	19760
Com_428_pos	Phthalic anhydride	C8H4O3	148	11.61	Organoheterocyclic compounds	"85-44-9"	251800	250800	302600	251000	320100	272200	273000	179400	175200	227800	236500	246200	232700	220900	257200	207600	227000	270000	283000	248200	319600	229800	269500	307600	225600	242300	273100	245500	229600	221800	214200	254500	208500	158100	195600	221100	228300	196000	283700	217200	188100	205500	242000
Com_429_pos	Maleic acid	C4H4O4	116.011	0.96	Organic Acid And Its Derivatives	"110-16-7"	3047000	2749000	2476000	351300	237400	304600	193800	179500	176400	89240	119000	125800	480700	544900	518100	332000	217500	301900	599300	591300	595900	372100	361400	375600	258800	164400	191200	411500	572200	389400	170100	188400	129100	65240	59740	73500	398100	439200	385800	246900	245800	231500	80450
Com_430_pos	Dibutyl phthalate	C16H22O4	278.152	13.42	Benzoic acids and derivatives	"84-74-2"	5750000	5668000	7626000	6183000	5661000	7314000	7116000	8468000	5008000	6387000	9345000	8266000	8679000	8303000	9566000	7657000	6410000	6171000	8357000	7152000	8491000	10890000	7063000	9828000	7406000	4795000	5123000	8205000	9657000	9133000	6394000	8434000	11000000	7722000	6812000	11200000	9315000	6809000	11160000	10140000	11670000	8730000	5480000
Com_431_pos	Chinese bittersweet alkaloid II	C18H33N3O3	339.47	6.13	Alkaloids and derivatives		98960	66040	84750	74120	93640	89050	106200	58830	193000	49080	72570	81140	96590	90540	111100	61930	90380	81620	98380	87020	101600	163000	70920	107900	141300	78850	106100	91240	97490	94890	111000	111900	93050	98490	90110	131000	97540	95470	125100	89240	99250	99410	84860
Com_432_pos	Chrysoeriol 5-O-hexoside	C22H22O11	462.404	7.18	Flavonoids		31440	19800	39120	27350	10110	23140	23600	40570	10130	12680	20909	19771	28470	10250	10060	21310	16435	16810	89610	86240	60130	26690	14360	11590	21642	9200	14504	24060	33720	35320	15160	26130	8990	11000	12273	10860	27990	14650	12790	5924	8761	9207	10540
Com_433_pos	Sarcosine	C3H7NO2	89.093	0.9	Amino Acid And Derivatives	"107-97-1"	3626000	3148000	3341000	7207000	4667000	7053000	2204000	2147000	2349000	1014000	1141000	1174000	3923000	3755000	3850000	1883000	1861000	1937000	4232000	4220000	3929000	2567000	2641000	2979000	1773000	1351000	1610000	6477000	6576000	6059000	2090000	2140000	2150000	919800	1009000	1027000	5126000	5567000	5053000	2058000	2258000	2001000	1371000
Com_434_pos	Spermidine	C7H19N3	145.246	0.68	Amines	"124-20-9"	4549000	4762000	4538000	3629000	2766000	3578000	2694000	2904000	2738000	2271000	2735000	2263000	4342000	4263000	4691000	1884000	2259000	2564000	4578000	4880000	4885000	3957000	4114000	4041000	1910000	2160000	1767000	4786000	3917000	4142000	2563000	3100000	2769000	1246000	1386000	830200	4121000	3913000	3960000	3878000	4083000	3659000	2078000
Com_435_pos	S-Methyl-5'-thioadenosine	C11H15N5O3S	297.333	4.94	Nucleotide And Its Derivates		2527000	2393000	2311000	1222000	616300	1224000	2043000	1961000	2579000	652000	1052000	1007000	1131000	1410000	1535000	589400	601300	677700	2378000	2681000	2047000	940200	904000	1187000	482300	492600	463100	1902000	2071000	1930000	1099000	1279000	948600	401000	377100	407800	2489000	2088000	2490000	1371000	1474000	1350000	631300
Com_436_pos	R-Aminobutyrate	C4H9NO2	103.12	0.91	Organic Acid And Its Derivatives	"3775-73-3"	4249000	3865000	4097000	677800	563300	529800	1943000	1293000	1480000	770900	1033000	849800	2576000	2653000	2500000	1500000	1508000	1718000	4955000	4845000	4773000	2148000	1566000	1617000	1375000	1275000	1264000	4672000	4096000	4051000	1895000	1605000	2653000	882900	965800	865000	4366000	5025000	4169000	3099000	4132000	2809000	1909000
Com_437_pos	Purine	C5H4N4	120.112	4.1	Purines and purine derivatives	"120-73-0"	35290	28420	26440	6319	1753	6625	4897	8681	4164	3709	2085	2041	26870	31530	24000	17630	16800	16070	11340	13390	14440	13440	14980	16860	13700	9600	12200	13850	18730	11310	6267	6338	5513	2218	1343	2799	14290	8347	11210	7372	6971	7370	2279
Com_438_pos	S-Adenosyl-methionine	C22H30N6O8S2	570.639	0.84	Nucleotide And Its Derivates	"17176-17-9"	2411000	2628000	2836000	696200	390000	567200	364400	450500	428900	362700	335200	350700	1599000	1401000	1307000	390400	482800	441000	1317000	1622000	1280000	605800	770100	800900	362600	330100	302400	1192000	1302000	1010000	553100	557700	482000	178000	233900	227600	1392000	1354000	1372000	608300	542700	454300	310500
Com_439_pos	Vitamin B2	C17H20N4O6	376.364	5.94	Vitamins	"83-88-5"	291700	212900	410100	67330	37140	63830	195300	48330	126300	59020	110400	128600	638500	631900	506100	375800	389400	454100	840400	897800	799000	587300	426100	437000	464400	291600	372700	765200	803800	656600	604100	577200	635900	302000	402700	368300	534900	608900	551300	689900	616300	511300	328500
Com_440_pos	Nε,Nε,Nε-trimethyllysine	C9H20N2O2	188.267	0.76	Amino Acid And Derivatives	"19253-88-4"	10300000	9047000	8915000	5895000	5337000	6875000	7904000	6463000	5373000	4539000	5114000	5083000	5492000	5352000	5215000	4098000	4341000	4732000	6680000	6546000	7119000	4883000	5373000	5452000	4125000	3680000	3619000	4910000	4567000	4238000	3822000	3734000	3554000	2477000	2656000	2339000	3705000	3580000	4287000	3970000	3180000	2949000	2388000
Com_441_pos	Linderane	C15H16O4	260.285	11.266	Terpenoids	"13476-25-0"	52620	87920	41970	42490	10780	29940	20110	7188	10370	17250	14510	14710	50470	78970	50620	17590	7894	10320	106500	131200	180300	32510	63960	24460	10110	5462	27139	108400	101600	105600	31850	24400	15750	15280	15050	14240	101600	120600	103500	23240	30140	24500	8315
Com_442_pos	Imperialine	C27H43NO3	429.635	6.799	Alkaloids and derivatives	"61825-98-7"	7186000	6964000	7459000	443900	314500	462300	2360000	2572000	2574000	1568000	2052000	1755000	2033000	2429000	2276000	1768000	1152000	1332000	1368000	1615000	1736000	1620000	1657000	2118000	1320000	1063000	1026000	718700	571600	639700	1236000	1399000	1020000	815900	995800	817600	460100	390100	484100	1054000	1219000	1140000	635300
Com_443_pos	Tulipanin	C27H31O16	611.5	6.35	Anthocyanins	"58285-26-0"	149400	253600	138900	1161000	2482000	4789000	71260	539100	327500	385600	303200	213600	4073	7492	9106	12570	33040	3901	18961	23783	34403	4581	30874	24817	5122	22446	68230	10500	21430	5870	24513	17540	8078	11460	3614	26582	22540	18190	20980	37260	21140	26380	7641
Com_444_pos	LysoPC 20:0 (2n isomer)	C28H58NO7P	551.39	9.09	Phospholipid		165800	133400	141300	2364	19324	3944	9268	8770	7801	3368	5147	4849	126900	125700	192800	45230	36820	33750	36790	54840	54710	45900	43860	28560	27990	21260	17390	7701	3872	4389	13350	6963	7446	15586	8768	5174	27111	4017	1937	3338	3242	3223	20111
Com_445_pos	Bornyl acetate	C12H20O2	196.29	9.209	Phenols And Its Derivatives	"76-49-3"	52340	64090	51560	11870	8132	17860	15820	5107	6695	14500	10490	15180	28190	29050	43240	35450	19740	12190	45120	36650	42990	17420	29410	28680	21280	17110	11200	21290	14430	16640	26690	17460	26800	14300	13600	5824	22040	13260	29980	24890	27760	21610	14460
Com_446_pos	Betulonic acid	C30H46O3	454.68	11.061	Terpenoids	"4481-62-3"	31130	19590	45410	13750	16950	13990	16640	14120	9403	14000	16370	10520	26910	11830	14020	21730	13520	19030	21540	8063	25210	14380	23160	17440	20030	20660	19670	19680	19750	23240	44490	15030	37030	30520	38140	27540	31890	38430	23010	34760	45760	17650	34080
Com_447_pos	Isopsoralen	C11H6O3	186.16	7.927	Coumarins and derivatives	"523-50-2"	373000	461600	456200	511800	390200	537300	392000	392700	402100	463900	409100	426500	464800	420900	439200	492900	408800	404600	382100	398600	434100	403100	380200	361600	404300	340300	387500	348100	349900	446500	394700	282900	369000	336500	307700	352700	260900	349900	299100	370100	329800	336100	326800
Com_448_pos	PolygalaxanthoneⅥ	C23H26O12	494.452	7.14	Ketones		44100	27400	22360	222300	420400	446900	187300	464000	296000	569400	437700	186700	35680	26590	29460	29460	38050	47230	44240	35650	34370	52800	43980	39120	19370	27440	35980	79610	59910	44710	105600	79830	51820	9358	45070	42400	60740	87090	54280	126200	123500	89680	59640
Com_449_pos	3-[(Carboxycarbonyl)amino]-L-alanine	C5H8N2O5	176.129	0.84	Organic Acid And Its Derivatives	"5302-45-4"	39490	42560	26900	26800	14230	24330	33680	21180	17010	14700	17510	33760	44590	28030	38230	32900	35790	31420	33240	49740	37770	54640	42260	45270	27490	14090	16290	16720	30560	19930	17700	17720	9948	13260	15070	7379	14440	12510	10560	16170	16690	8945	11710
Com_450_pos	(-)-chimonanthine	C22H26N4	346.476	7.98	Indoles and derivatives	"5545-89-1"	11440	20560	21160	28550	22910	33710	22240	22160	18280	15260	20743	24290	21560	26660	30230	26170	22850	12910	17130	24170	22850	12350	28830	11810	27450	13640	17860	19370	26530	25970	20740	19550	12050	11830	19170	35020	13610	10120	24770	23540	10480	28780	22550
Com_452_pos	Protobioside	C45H74O18	903.071	7.89	Isoflavonoids	"128052-96-0"	255700	544400	360000	16490	5623	4009	256500	173100	185400	18000	20190	54150	48210	57430	82360	7894	10410	19760	23610	45400	6899	48480	30980	41670	18780	10610	8020	4251	12300	8621	26850	54880	39960	11520	8264	4511	8985	10570	6849	93860	59480	86770	22640
Com_453_pos	Adenosine 5'-Diphosphate	C10H15N5O10P2	427.201	1.05	Nucleotide And Its Derivates	"58-64-0"	1119000	1388000	777800	765800	463000	898800	312900	513400	430400	129000	283800	180600	314907	240000	199300	208133	205952	230090	677000	683700	628500	107600	229700	270600	18160	16150	23350	237700	239000	203600	81820	121900	61980	10510	14630	114683	183100	199600	322700	126700	121100	69950	118352
Com_454_pos	Aspartic Acid	C4H7NO4	133.103	0.84	Amino Acid And Derivatives	"6899-03-2"	7790000	7473000	6970000	26510000	20210000	27230000	12890000	12820000	13540000	10330000	11400000	9585000	8385000	8349000	7969000	6735000	6720000	7288000	17640000	17100000	18240000	7224000	8197000	7841000	6365000	6434000	6873000	24210000	25700000	24030000	11420000	12290000	11580000	6546000	7294000	6803000	25460000	26320000	23660000	11740000	11860000	11150000	9229000
Com_455_pos	Ala-gly	C5H10N2O3	146.144	0.84	Amino Acid And Derivatives	"687-69-4"	85830000	76890000	81200000	7608000	6085000	7390000	9997000	12140000	10360000	4440000	4325000	4054000	41160000	40970000	39340000	33890000	33700000	38010000	15140000	16990000	13860000	23600000	25680000	28490000	23940000	20650000	21270000	12660000	12080000	12280000	12510000	12780000	10480000	3395000	3543000	3136000	13430000	14260000	12740000	17920000	18270000	16700000	6342000
Com_456_pos	Allopurinol	C5H4N4O	136.111	2.69	Nucleotide And Its Derivates	"315-30-0"	104100	65110	116000	106200	62400	118000	123800	103800	113500	59990	60740	60760	165700	90420	103300	18230	14770	28520	351700	139800	152600	72170	29520	43720	200100	40890	40930	150400	186900	136400	73880	74800	106400	31620	35170	35640	106900	104400	94630	124600	145100	93690	54470
Com_457_pos	Gly-Phe	C11H14N2O3	222.24	4.88	Amino Acid And Derivatives	"3321-03-7"	349900	247200	586500	22170	17880	34360	45480	23200	43920	15950	26960	28780	565500	403500	350800	104500	90890	80630	437000	537300	423100	247700	164100	193400	176700	78080	149400	245100	335000	175900	143400	111400	188500	68400	73870	66380	141500	125400	112300	164000	197500	137200	115600
Com_458_pos	glutathione disulfide	C20H32N6O12S2	612.631	1.81	Amino Acid And Derivatives	"27025-41-8"	2617000	2965000	2549000	1392000	633500	1431000	988500	848500	1145000	594200	761300	546200	1056000	1311000	1349000	250600	252300	286100	1832000	2371000	2119000	559100	505600	757300	203500	187900	143600	1900000	1945000	1754000	865100	912700	848600	234900	260400	175200	1696000	1944000	1530000	1662000	1485000	1460000	563500
Com_459_pos	Histidine	C6H9N3O2	155.15	0.81	Amino Acid And Derivatives	"4998-57-6"	38060000	37870000	36390000	1179000	985100	1383000	2309000	2433000	2006000	1205000	1309000	1251000	17500000	16640000	15600000	9955000	8205000	9090000	5251000	6275000	5079000	8254000	7984000	9660000	6184000	4066000	6764000	1453000	5595000	1366000	1827000	1385000	1518000	816000	813800	847400	1414000	1485000	1425000	1850000	1931000	1891000	965700
Com_460_pos	Homocysteic acid	C4H9NO5S	183.18	1.83	Amino Acid And Derivatives	"1001-13-4"	406100	356200	444700	10780	15753	17271	14530	34310	41440	33725	15670	29502	169200	130100	199200	88230	107500	111400	35130	54050	52550	125100	155800	170100	69900	61820	71890	25650	52990	25640	42840	31330	20300	9767	20020	8365	24170	23040	17660	45560	29310	24620	17430
Com_461_pos	Homoserine	C4H9NO3	119.119	0.9	Amino Acid And Derivatives	"1927-25-9"	17450000	15360000	15990000	10270000	6168000	8973000	5300000	5458000	5354000	2562000	2604000	2194000	11040000	10410000	10640000	7947000	7534000	9164000	10830000	12510000	10750000	8739000	9438000	9684000	7526000	5688000	6584000	15950000	15940000	14630000	6474000	6639000	6162000	2158000	2241000	2140000	12080000	14140000	11840000	7317000	7486000	7091000	2619000
Com_462_pos	Isomaltose	C12H22O11	342.297	0.9	Carbohydrates And Its Derivatives	"499-40-1"	76680	164300	85500	179000	223200	133700	51640	58810	59620	40110	51170	76840	198300	159200	202200	297100	148300	146800	246700	174100	174000	129200	147600	114600	116800	91910	183200	159900	127500	175200	51830	79490	114800	72980	67590	99340	301600	226400	406200	166500	128500	120600	73540
Com_463_pos	Tricetin O-hexoside			6.46	Flavonoids		227100	165000	269300	2320000	1336000	4448000	89720	661800	374700	445500	317800	203800	157047	143872	157383	77595	15290	34089	191582	215304	287524	71294	33104	46015	65820	37267	84264	37020	223135	68159	37520	26398	21129	40520	16980	42379	12809	51190	20828	104800	136700	89190	39040
Com_464_pos	Citronellyl acetate	C12H22O2	198.3	11.795	Fatty Acyls	"150-84-5"	317900	324200	311900	201400	399300	345100	328900	361800	372000	326400	243200	319700	343200	225500	327800	257100	331100	542100	226700	366000	320100	257500	337600	453800	343400	477300	258000	315600	257400	323800	333000	571800	268800	400800	350700	533700	322300	687600	295300	194900	354200	326600	388100
Com_465_pos	Benzoyleneurea	C8H6N2O2	162.15	11.68	Organoheterocyclic compounds	"86-96-4"	6487000	6907000	7014000	6262000	6579000	6067000	6039000	6013000	6343000	6167000	6107000	5828000	6207000	6643000	6225000	6171000	6321000	5632000	5816000	6179000	5911000	5864000	5737000	5815000	5616000	5594000	5651000	5370000	5747000	5783000	5422000	5645000	5568000	5311000	5435000	5446000	5228000	5343000	5537000	5436000	5568000	5267000	5454000
Com_466_pos	6-Paradol	C17H26O3	278.39	12.85	Benzene and substituted derivatives	"27113-22-0"	7803000	15210000	4374000	88150	41640	24080	14210	12650	31490	298298	17020	15690	3294000	5609000	6150000	701100	419300	195500	933300	1434000	2455000	702100	1639000	261100	126700	704600	133900	434200	97130	391600	316600	10380	23790	174900	248800	308200	41030	119700	25800	127300	77080	321314	12470
Com_467_pos	N-(3-Indolylacetyl)-L-Alanine	C13H14N2O3	246.262	6.78	Indoles and derivatives	"57105-39-2"	62930	59820	59970	6096	6433	12850	44920	59790	52640	18180	28500	28890	25520	16870	35390	14720	14830	9950	17130	17650	13200	42480	35250	46830	16080	8826	14090	6472	4508	20252	22780	25730	24060	14930	19280	11730	18747	15321	18262	31270	24330	20240	15620
Com_468_pos	N-(9H-Purin-6-ylcarbamoyl)threonine	C10H12N6O4	280.24	14.46	Nucleotide And Its Derivates		176500	118200	259200	362600	188200	296700	245200	268300	289100	381400	192700	330900	238900	247400	275400	335100	280600	346600	358900	255900	243300	239600	234300	315800	358300	264300	242300	478600	308700	387500	299600	298000	319900	351200	321100	277200	509800	381600	391500	239500	339400	272400	341900
Com_469_pos	N',N'',N'''-Di-p-coumaroyl, p-hydroxybenxoylagmatine			12.92	Amines		148600	313300	220100	18090	8477	14960	16670	12910	18080	8291	8787	13680	193500	269900	267200	61260	32330	22550	74270	110400	100400	82500	104200	76820	16200	12430	25660	25810	17790	27700	36630	33460	20910	18120	20740	23710	26380	24590	26020	17170	21730	11920	14460
Com_470_pos	C-pentosyl-apigenin O-p-coumaroylhexoside	C35H34O16	710.63	7.17	Flavonoids		27620	23440	33150	14770	8583	24780	21400	31780	30910	25910	24650	20010	26730	24860	13460	22110	15110	8194	22470	33810	10190	23410	16720	16070	10070	18190	18610	17860	16790	16600	9814	13970	22830	6823	11150	15930	19940	19270	24620	28290	34420	40350	23360
Com_471_pos	D-Panthenol	C9H19NO4	205.131	4.7	Fatty Acyls	"81-13-0"	28840	4006	8329	3948	11540	7618	12000	9490	5187	9014	15110	8022	34830	24130	15700	5991	16860	11780	7245	20210	17120	22070	9873	3386	62600	16360	13160	9191	37820	10400	5943	34800	8050	17110	18630	16570	8704	6789	6819	5031	6525	8798	6391
Com_472_pos	N2-Acetyl-L-lysine	C8H16N2O3	188.224	1.03	Amino Acid And Derivatives	"1946-82-3"	2102000	1883000	2088000	3893000	2319000	3796000	1554000	1670000	1687000	1100750	953700	738800	1022000	1107000	1047000	773210	287700	386500	4466000	5427000	5017000	1158000	1192000	875500	787360	302600	418800	4258000	4024000	3963000	1579000	1740000	1521000	571500	890200	610700	5024000	4984000	4597000	2330000	2317000	1899000	1075000
Com_473_pos	Nε-(1-Carboxymethyl)-L-lysine	C8H16N2O4	204.224	0.84	Amino Acid And Derivatives	"5746-04-3"	196200	151200	257200	255800	156300	290200	155600	117800	145400	99340	74040	64090	265900	155000	127700	186700	80440	93860	308400	369100	355700	100900	131300	126900	179800	102000	249600	360300	692400	278600	156100	164500	159700	118200	106800	106000	255600	278200	277500	156400	185700	132100	98760
Com_474_pos	N-Methyl-a-aminoisobutyric acid	C5H11NO2	117.146	1.22	Amino Acid And Derivatives	"2566-34-9"	84320000	77290000	76310000	8419000	5034000	8223000	6548000	7835000	6330000	3078000	3705000	3033000	37800000	37480000	36820000	22770000	23280000	26250000	19230000	21410000	18910000	21230000	22340000	26850000	16150000	12970000	14290000	16650000	19350000	14680000	7211000	7057000	6649000	2518000	2526000	2144000	12800000	13750000	11920000	8525000	9080000	7617000	2683000
Com_475_pos	N-Methyl-L-arginine hydrochloride	C7H17ClN4O2	224.688	0.95	Amino Acid And Derivatives	"156706-47-7"	211000	189600	172700	50990	57820	52130	178600	24830	87429	77432	78322	60216	216700	218000	223000	96240	109700	94320	312200	326200	323500	101200	100500	63060	28530	73080	71890	93930	102400	75440	23220	68888	87142	43441	48444	56140	85530	146200	81270	30060	21160	22360	70111
Com_476_pos	Oleoylethanolamide	C20H39NO2	325.298	14.61	Amines	"111-58-0"	6369	6625	7097	11420	5403	5900	5582	5668	7281	5473	5248	5383	12410	11490	7936	22210	7504	10310	11600	8615	5554	8259	7569	8251	15990	9586	53530	7045	11840	6858	9600	7096	7380	6732	7819	10550	5864	5897	6584	5475	6729	5150	6724
Com_477_pos	4-Methylaminobutyrate	C5H11NO2	117.07	0.92	Amino acids and derivatives	"1119-48-8"	18870000	16240000	18350000	3363000	2389000	3349000	8852000	8357000	7859000	10170000	10540000	9376000	4543000	4461000	4251000	5266000	4885000	5799000	3408000	3802000	3333000	3497000	3894000	3793000	5392000	4873000	4519000	1716000	1749000	1505000	3228000	3301000	3220000	4550000	5336000	3956000	1437000	1156000	1171000	3403000	3166000	3094000	2684000
Com_478_pos	N-Acetyl-D-phenylalanine	C11H13NO3	207.226	4.1	Amino Acid And Derivatives	"10172-89-1"	113500	108400	113400	24690	17460	20380	12700	19110	21960	14500	12240	5270	62830	51800	47200	34740	26110	34500	13240	17940	17190	27070	27410	39600	34170	24640	34030	43670	48120	37340	20020	22190	27930	14540	14690	12970	62910	55610	50850	39370	39790	36320	14400
Com_479_pos	Quercetin-3-O-neohesperidoside	C27H30O16	610.153	6.35	Flavones and Flavonols	"117611-67-3"	156900	144400	326500	2547000	2257000	2125000	78940	1393000	517500	536700	412900	756600	5358	7658	67000	12530	28000	6761	2165	9734	5395	21120	2697	18592	53857	26382	82731	24880	23710	16190	21010	20120	16140	2265	7624	4467	26970	34390	35680	47260	26840	46330	5855
Com_480_pos	Germacrone	C15H22O	218.335	13.552	Carbonyl compounds	"6902-91-6"	33440	30240	30740	21570	31570	22580	24890	20410	24000	29590	33580	23720	30490	43910	29340	23770	25380	33170	24940	15620	42510	23610	18850	31060	27160	26690	24700	32820	25870	23950	30020	27710	30460	31020	39820	28090	33140	30020	30930	28170	25430	27970	24530
Com_481_pos	4-MethoxycinnaMaldehyde	C10H10O2	162.068	9.19	Phenolic acids	"1963-36-6"	70270	102800	91520	64880	78230	64570	82170	72000	76490	70950	69180	73040	69130	81040	85120	78120	69600	82970	83120	81450	96250	74570	74490	56900	47450	57730	40830	54750	46570	65730	67470	56570	46420	46410	61130	42780	49490	28290	63430	51830	54510	40460	53380
Com_482_pos	Pyridoxamine	C8H12N2O2	168.09	0.8	Pyridines and derivatives	"85-87-0"	143400	146900	187400	44080	26630	42890	66710	103500	53990	66170	65240	60920	96800	67180	81400	35360	36970	39170	74600	62540	69110	45260	44940	44610	53700	11990	20410	48410	43960	33610	48840	41800	39250	28790	37760	19650	45970	43490	18590	26690	31150	36810	28660
Com_483_pos	Diisobutyl phthalate	C16H22O4	278.152	13.44	Benzoic acids and derivatives	"84-69-5"	2958000	3351000	4458000	2238000	2776000	4334000	3624000	3594000	2640000	2881000	4564000	2457000	4737000	3904000	3394000	4929000	2710000	3247000	3425000	4918000	4873000	3479000	2903000	3294000	3090000	2832000	3184000	3003000	3258000	3214000	3905000	3147000	3587000	3292000	3079000	6098000	3229000	3324000	3846000	4386000	5562000	4242000	2303000
Com_484_pos	Feruloylcholine		280	12.63	Cinnamic acids and derivatives		108700	199700	61760	16733	18962	4852	18634	19012	30867	16046	19816	18645	36660	72370	68010	6841	3627	17844	11670	21340	35100	6001	14360	21780	13928	7572	17333	7561	22416	6420	16988	19906	21096	11005	4477	7671	1594	1694	25164	18680	2082	21884	22176
Com_485_pos	1,4-dihydro-1-Methyl-4-oxo-3-pyridinecarboxamide	C7H8N2O2	152.059	1.66	Pyridines and derivatives	"769-49-3"	133200	60310	74170	31290	15800	31400	60190	43930	49780	46950	57200	27430	332000	60460	46100	91130	47530	45220	81140	60240	84050	52350	31740	42730	167600	35020	90720	68450	252500	59550	45930	45150	42320	33450	26450	17890	34060	25550	14620	29140	53610	39690	15680
Com_486_pos	Melezitose	C18H32O16	504.44	0.998	Carbohydrates And Its Derivatives	"597-12-6"	2009000	2286000	1836000	2047000	1324000	1677000	587100	2088000	2235000	653000	1017000	778300	611300	659400	735100	466700	450300	452300	1428000	1646000	1403000	509000	491700	495200	402300	399800	393400	1033000	1029000	1554000	304300	313300	381500	327000	317700	314800	1953000	1983000	2159000	492600	516600	468600	422700
Com_487_pos	Ademetionine	C15H22N6O5S	398.44	0.8	Amino Acid And Derivatives	"29908-03-0"	97590	117500	94730	24530	15060	23560	10690	7303	24500	8634	11220	10190	43660	34710	28780	21250	17810	7842	41740	47900	21900	18370	22350	20040	5870	7814	11270	65650	26000	30490	18080	20860	21530	6273	6095	18954	36350	56530	26910	9140	17430	8849	16648
Com_488_pos	N-acetylglycine	C4H7NO3	117.043	0.91	Amino Acid And Derivatives	"543-24-8"	613100	297200	305400	771600	563600	828300	2693000	2073000	2163000	1272000	1548000	1285000	716800	1422000	569000	517400	542100	542100	1196000	1428000	1163000	577900	383500	367900	875500	463100	521100	747000	794200	729300	604400	789300	1190000	432800	403200	540900	801600	799000	689800	1952000	2594000	1670000	944000
Com_489_pos	N-Acetylthreonine	C6H11NO4	161.069	1.73	Amino Acid And Derivatives	"17093-74-2"	84890	90260	88990	272200	183500	249800	104300	96360	106300	41820	72080	53560	62050	46820	42790	50040	36360	54480	185200	195700	159800	40190	44780	41140	34270	39350	44390	237100	230900	186100	89530	64520	54450	15050	30190	19480	241700	211300	204500	83530	117400	110700	30870
Com_490_pos	1-O-Caffeoyl quinic acid	C16H18O9	354.095	5.43	Alcohols and polyols		5307000	5755000	1545000	21490000	40000000	28280000	3294000	31640000	6296000	21770000	9595000	8793000	78080	83520	153200	16150	21660	27110	135000	128800	214700	121700	131900	249500	11310	35600	16370	56170	165700	91230	167900	375100	188400	12280	17990	28270	140300	76540	94540	318200	510000	583900	65700
Com_491_pos	7-methylguanine	C6H7N5O	165.065	4.11	Purines and purine derivatives	"578-76-7"	34230000	29920000	33560000	6050000	3506000	6526000	4384000	4983000	4820000	2048000	2757000	2337000	30210000	27990000	28890000	20150000	20680000	22180000	11660000	13410000	12020000	16570000	16930000	21120000	17560000	10750000	13260000	15290000	18490000	12900000	6582000	6546000	6207000	2458000	2848000	2638000	12590000	12970000	11600000	8228000	9297000	7702000	3159000
Com_492_pos	Chrysin 7-O-beta-gentiobioside	C27H30O14	578.526	7.48	Flavones and Flavonols	"88640-89-5"	29140000	28350000	27720000	12520000	8933000	12450000	20810000	20300000	21230000	17900000	17410000	19220000	19170000	19100000	18180000	11930000	12960000	13830000	17400000	19580000	18240000	15810000	16270000	19890000	12830000	11530000	12130000	14960000	16960000	14960000	17520000	17020000	16710000	10820000	12810000	11240000	18320000	17870000	16000000	23110000	21780000	19830000	13870000
Com_493_pos	Asp-glu	C9H14N2O7	262.217	0.96	Amino Acid And Derivatives	"6157-06-8"	339600	284900	332300	107700	86350	138400	223500	243900	257500	210700	204400	215500	165100	177200	199100	102200	126000	106100	246500	180800	236100	148000	136700	155100	147400	112500	65560	126900	144700	126600	124300	184500	173800	94510	121400	94150	167500	164700	150500	252500	223800	223900	139900
Com_494_pos	L-Hydroxylysine	C6H14N2O3	163.195	0.9	Amino Acid And Derivatives	"1190-94-9"	448500	443900	454200	549800	432100	485500	165100	184900	145600	109800	96360	126700	452600	378700	433200	364400	381700	403200	600000	543400	584800	296600	275500	276300	314800	290800	276500	467800	459900	441200	180300	172700	167000	102500	174300	140000	574500	573800	553100	247900	240300	211100	161400
Com_495_pos	Dl-3-Hydroxynorvaline	C5H11NO3	133.146	0.85	Amino Acid And Derivatives	"2280-42-4"	8292000	7893000	7191000	28810000	22520000	28560000	13210000	14480000	15250000	10790000	11680000	11280000	9188000	9075000	8916000	7215000	7068000	7359000	18800000	18450000	19620000	8206000	8630000	8165000	7429000	6908000	7493000	27250000	23530000	25950000	12810000	13140000	12560000	7249000	7901000	7373000	27020000	28210000	25740000	11700000	13160000	11920000	10310000
Com_496_pos	D-Homocysteine	C4H9NO2S	135.185	1.86	Amino Acid And Derivatives	"454-28-4"	287300	242100	279600	19626	16728	14960	25060	20770	51976	41384	36198	38305	127300	79210	136500	62570	74260	59090	39390	43820	16510	89110	94750	117100	48490	43290	53450	36410	48440	17080	35849	27180	30260	40307	15910	29545	14750	25760	42330	14690	27520	11420	24511
Com_497_pos	Deoxyadenosine	C10H13N5O3	251.242	2.78	Nucleotide And Its Derivates	"958-09-8"	441900	321100	896200	92240	34480	94730	261300	73460	142100	52420	102700	89950	1366000	1502000	1358000	547470	479640	503950	1789000	1479100	1835000	904500	678300	697200	16150	456060	479620	1828000	947430	1468000	1112000	955900	1191000	16080	509880	14510	1620000	1537000	1358000	1531000	1662000	1296000	665500
Com_498_pos	Cycloleucine	C6H11NO2	129.157	0.84	Amino Acid And Derivatives	"52-52-8"	215700000	210600000	212200000	47120000	33880000	47870000	38230000	43420000	38860000	17920000	21260000	20870000	109200000	117200000	115000000	98750000	97540000	104600000	57730000	62520000	53770000	71340000	73230000	85190000	66800000	59090000	63860000	49250000	44410000	43920000	40850000	41760000	36360000	13700000	14810000	13320000	46610000	48150000	46110000	53120000	53750000	52330000	19960000
Com_499_pos	beta-Caryophyllene	C15H24	204.35	9.76	Terpenoids	"87-44-5"	6896000	7448000	7663000	10670000	9628000	8918000	8989000	12290000	8142000	7170000	6422000	5770000	7509000	7154000	10530000	7768000	6376000	8554000	8587000	7269000	6347000	8122000	5689000	7227000	10930000	8433000	8234000	6027000	8398000	8451000	5376000	7062000	5935000	7159000	9228000	9586000	5867000	5227000	7187000	6464000	10010000	6722000	7935000
Com_500_pos	2-Ethylbutyric Acid	C6H12O2	116.16	11.142	Fatty Acyls	"88-09-5"	18820000	19180000	18390000	16930000	16010000	16200000	15710000	13060000	11690000	11220000	12770000	13540000	13740000	13460000	14040000	14400000	14570000	13980000	12410000	13410000	13730000	13180000	13290000	12630000	11730000	11700000	11450000	11290000	10910000	11880000	10900000	9601000	9225000	9211000	9661000	9338000	9430000	9015000	8702000	9193000	8928000	8301000	8031000
Com_501_pos	Lipoamide	C8H15NOS2	205.341	4.89	Organoheterocyclic compounds	"940-69-2"	452600	416300	373500	9794	9348	14040	47360	51430	44490	21640	12090	10430	82750	74520	89230	107700	106300	118200	14060	27400	26570	72030	99660	76250	97820	85510	85180	11910	38920	10200	20800	27500	16160	16770	9542	24200	12060	14050	10200	19530	14820	12560	6710
Com_502_pos	Betaine	C5H11NO2	117.15	0.907	Alkaloids and derivatives	"107-43-7"	567700	331200	309100	887500	732600	931200	2411000	2063000	1418000	1365000	1324000	1126000	785200	1470000	696600	485800	428500	500500	1103000	1228000	937700	500500	288400	346400	1054000	524400	499900	659000	820900	629300	627700	742000	1028000	451700	452000	561900	934200	841200	952100	1819000	2690000	1763000	863100
Com_503_pos	5-Methyluridine	C10H14N2O6	258.228	1.02	Nucleotide And Its Derivates	"1463-10-1"	28010	31250	18400	55140	24910	14330	9552	13440	38490	17958	23520	20370	21800	26240	23840	12980	25830	22001	64970	39700	40920	12850	21500	34870	18572	17139	20458	74380	52510	60190	17800	18380	49400	12210	20200	41420	77930	81290	87910	37080	61650	19790	37000
Com_504_pos	4aR-(4aalpha,6beta,8aalpha)]-4a,5,6,7,8,8a-Hexahydro-4,8a-dimethyl-6-(1-methylethenyl)-2(1H)-naphthalenone	C15H22O	218.33	11.66	Terpene		31060000	31230000	32020000	29580000	32070000	31070000	31140000	31000000	31070000	30690000	30550000	31180000	31060000	31300000	30320000	30320000	30690000	31500000	30490000	31480000	30110000	30430000	30980000	30610000	30280000	29370000	30150000	29930000	30290000	30360000	30770000	29480000	30270000	29600000	28440000	28290000	29840000	30350000	30300000	29750000	28970000	29740000	29460000
Com_505_pos	Guanosine 3',5'-Cyclic Monophosphate	C10H12N5O7P	345.205	0.71	Nucleotide And Its Derivates	"7665-99-8"	108400	69790	76750	29990	6653	38190	77700	58770	57370	41760	63710	109300	66810	67720	74320	14150	46330	50740	72560	58310	59280	42760	57340	79170	21060	32510	21010	58110	26450	38330	28640	42300	41060	28590	21570	10130	10790	33360	13780	73140	64390	54870	27530
Com_506_pos	Biotin	C10H16N2O3S	244.311	9.02	Vitamins	"58-85-5"	920400	822800	801200	799000	845300	779800	816800	682400	695800	658300	708700	760000	741300	743100	765900	629300	725500	653600	688300	568000	701600	637100	775900	805300	724500	586600	596500	766800	585000	655800	631700	597000	610600	685200	620400	691900	661100	642200	676800	647400	525300	721400	718700
Com_507_pos	Histamine	C5H9N3	111.145	1.04	Amines	"51-45-6"	161200	86950	250000	63700	29800	70660	109800	20980	48730	36720	36570	22840	343600	421300	397000	210700	183600	145800	435600	577600	492400	243000	252600	218300	220700	168600	118500	394200	270300	293300	315800	321400	388400	182700	152700	122500	276300	229800	159800	344700	427300	319000	213100
Com_508_pos	N-Acetylputrescine	C6H14N2O	130.188	0.75	Amino Acid And Derivatives	"18233-70-0"	100600	95960	93330	31590	30660	40030	28560	28320	17880	19340	28830	30680	51590	48990	52530	34660	23710	14970	100300	105500	111500	36580	37980	45720	20120	19200	30280	54610	63600	52960	38170	34290	46280	18120	21600	21000	46430	44800	49240	102700	75780	87030	83020
Com_509_pos	N-Acetyl-L-valine	C7H13NO3	159.183	0.96	Amino Acid And Derivatives	"96-81-1"	240300	113100	153700	335700	181300	351700	282800	268200	334000	202900	267700	215200	178977	157364	171589	168772	182221	167523	179100	256100	183600	152800	120200	92660	56320	45910	62160	492700	466000	432500	300900	343500	274100	88230	83630	98950	531700	596100	590600	592600	610400	566600	251100
Com_510_pos	N-Acetyl-5-hydroxytryptamine	C12H14N2O2	218.252	5.98	Amino Acid And Derivatives	"1210-83-9"	30990	23510	37310	28380	10070	10100	7556	21390	16030	24070	17250	19470	47730	58230	42220	42130	29140	10150	32030	43860	29530	34240	49720	47710	14400	36960	15560	34510	27970	25560	28230	41310	29850	27630	28880	25800	15930	22140	17710	51990	26690	16560	34840
Com_511_pos	N1-Acetylspermine	C12H28N4O	244.377	0.88	Amines	"25593-72-0"	52380	66100	95150	25890	21770	22380	22760	31780	33420	27250	34220	21350	48370	59820	52220	15980	30470	28620	36790	32610	30510	27790	37010	41870	30200	26510	31680	43380	36670	37520	27510	21080	32130	11680	12380	13570	15430	27810	15950	24850	24210	32320	17620
Com_512_pos	Tetraethylammonium fluoride dihydrate	C8H20FN	149.25	1.04	Pyrimidines and pyrimidine derivatives	"63123-01-3"	872400	276500	665800	194600	48050	220100	311000	71730	259600	82680	114500	104400	1451000	1524000	1155000	593600	578800	425500	1577000	2547000	1769000	1081000	1479000	1241000	435800	798900	744800	1361000	878100	1392000	859600	915200	844900	359400	625000	545300	2345000	635700	948000	870900	1163000	1108000	1135000
Com_513_pos	6-Aminohexanoic acid	C6H13NO2	131.173	2.1	Amino Acid And Derivatives	"1319-82-0"	456800	395300	423500	29590	15010	30050	24950	26160	32120	11640	14590	4785	190800	195700	192000	125100	138100	141600	80780	87140	76180	108100	133000	136200	118400	74470	84120	62910	70680	57780	37060	29470	39860	11960	9522	11860	56500	57170	46180	48920	54480	32170	12460
Com_514_pos	5'-Deoxy-5'-(Methylthio)Adenosine	C11H15N5O3S	297.333	4.91	Nucleotide And Its Derivates	"2457-80-9"	2319000	2312000	2422000	1314000	855700	1309000	2563000	2246000	2585000	754300	1125000	1258000	1503000	1582000	1603000	501100	671400	704300	2502000	2658000	2626000	1397000	1582000	1485000	684500	586100	547900	2301000	2259000	2509000	1219000	1232000	1349000	462100	458600	317000	2032000	2593000	2226000	1527000	1538000	1658000	620200
Com_515_pos	Sibutramine	C17H26ClN	279.848	12.68	Benzene and substituted derivatives	"106650-56-0"	82120	146700	49490	36467	31411	29232	28215	37011	45141	32270	40308	26746	40800	65790	68210	3637	3218	2091	9282	13100	26390	2791	16420	26960	14543	4743	5320	2817	20385	3788	3431	21336	2116	11307	3091	12909	21503	21538	20380	23167	21292	23439	19992
Com_516_pos	Apigenin C-pentoside	C20H18O9	402.35	0.73	Flavonoids		297400	318400	224700	116600	28910	128200	289300	336900	219500	190800	481800	278200	236200	251800	337900	89270	112600	167100	213200	125800	112900	274000	343300	282200	82230	99350	107200	123400	160200	119600	109500	189600	192000	78600	93870	62570	82910	47580	74140	307100	155500	131000	104000
Com_517_pos	9,17-Octadecadiene-12,14-diyne-1,11,16-triol	C18H26O3	290.397	13.78	Fatty Acyls	"211238-60-7"	291400	1026000	112300	6646	2903	2546	21999	2663	3623	4670	14620	21840	180200	273700	290600	101100	36640	33180	182600	159300	343000	81970	226600	29320	21370	90850	12420	79530	24460	60130	64820	32486	7297	35500	42820	31330	6679	16960	31898	14310	16840	5776	2798
Com_518_pos	8-Chlro-1-tetrahydronorharmanone	C11H9ClN2O	220.655	2.67	Indoles and derivatives	"5565-76-4"	360400	402300	354700	13550	15200	17760	107900	117500	88260	50030	34760	37730	115700	96730	132700	94260	110000	110500	35560	48850	53760	161200	162800	178100	120700	92520	100700	33530	54000	26960	104600	123500	89950	77980	86590	75930	31230	38170	25910	130300	162000	103000	51050
Com_519_pos	Indole-3-acetic acid	C10H9NO2	175.18	7.567	Phytohormones	"87-51-4"	18040	22730	9135	9483	10000	19373	14478	24730	13120	14130	23320	13150	16160	14680	23440	13310	14930	19910	13710	15670	7743	17930	8504	19660	22610	22790	12060	9002	10190	14820	18640	13470	22380	18830	30770	29470	3503	11100	4243	8550	12450	5952	14920
Com_520_pos	Azelaic acid	C9H16O4	188.22	7.433	Organic Acid And Its Derivatives	"123-99-9"	304900	252700	309700	173600	224100	195100	198900	104500	219300	147800	158100	193500	462100	421200	599800	392800	327200	316400	493900	608700	600900	485900	288100	370600	364600	215800	277100	312500	244700	330800	330400	213900	272900	214400	296800	248100	221600	233200	207800	229900	314900	276100	202700
Com_521_pos	N',N",N"'-p-coumaroyl-cinnamoyl-caffeoyl spermidine		583.2	4.95	Phenolamides		53160	66030	65040	9491	15380	15680	11090	12750	16050	1624	11160	7839	38710	37610	33300	7004	13210	9468	25460	22160	9745	20130	9766	15180	3513	2705	10290	21650	14640	13510	16730	20120	15710	7560	6768	6760	14050	12680	14340	25930	26540	31150	6750
Com_522_pos	N-hexosyl-p-coumaroyl putrescine		396.1	17.63	Cinnamic acids and derivatives		6263	6093	4930	8634	8013	8407	6895	5358	7116	6103	7072	5794	6608	7738	6689	6912	4613	6574	6539	8704	4548	5553	6879	4832	5882	6158	7129	5965	4898	4295	8198	5936	7096	5828	5276	8178	6597	5356	4838	6172	6018	6831	4582
Com_523_pos	Agmatine	C5H14N4	130.1	0.92	Amines	"306-60-5"	132500	132000	123700	290100	169600	258600	123900	134400	118300	55340	83100	96020	117300	120400	118300	42240	38170	41590	723300	812400	714000	57050	95480	87240	32410	28810	32980	392600	340400	341000	54990	55980	63930	24050	20350	21800	302900	321700	298200	65690	83120	62470	27270
Com_524_pos	N'-p-Coumaroyl agmatine		276.2	13.08	Cinnamic acids and derivatives		1561000	2657000	832500	60480	78880	53280	104400	67240	73460	76080	76540	89130	675200	974700	1430000	191800	189500	189600	365700	494000	671200	213600	155900	195700	142300	204000	170500	161200	120800	158700	197200	99310	95630	79963	138600	79222	122000	129800	108200	94160	159200	108600	99720
Com_525_pos	N-p-Coumaroyl agmatine	C14H20N4O2	276.1	13.08	Cinnamic acids and derivatives		291600	519300	165700	6391	13496	13496	80663	90482	85514	45697	40551	46000	147900	239200	244000	43390	18420	14070	44350	63130	104700	20120	77600	10310	78695	38560	61600	15050	47155	15420	19780	60312	55821	5590	15440	9033	27372	26412	20846	61634	59843	58089	32199
Com_526_pos	1-O-Feruloyl quinic acid	C17H20O9	368.1	6.23	Alcohols and polyols		696400	1035000	488500	2895000	791000	1195000	59650	475300	320300	156900	123200	165900	499600	707800	504800	162500	193700	260800	928500	744100	657400	416700	557100	470400	223700	212900	318200	1254000	639600	728300	349000	839000	352900	849900	856900	398000	546700	740300	477100	454000	450700	284400	188500
Com_527_pos	Apigenin C-glucoside	C21H20O10	432.113	6.46	Flavonoids	"38953-85-4"	91550	65970	80860	10380	12279	8309	15470	25590	22480	16641	7906	12670	7037	15520	13510	18305	12480	13080	27820	28700	32470	12450	10040	7495	13775	11023	29464	9293	3204	8025	6816	7949	11690	10417	13097	11896	15144	7933	4018	8078	11300	21660	13106
Com_528_pos	LysoPC 16:2	C24H46NO7P	491.308	11.06	Phospholipid		3046000	3786000	2786000	165300	83810	142100	261600	322100	426900	123900	164000	207100	1731000	1800000	1528000	427200	284300	289400	1050000	1496000	1321000	868200	1026000	884100	134700	218700	247900	244600	326700	273100	391200	426200	277300	119100	200100	129900	214200	204900	149600	234900	203300	190000	69020
Com_529_pos	Cinnamoyl tyramine	C17H17NO2	267	17.3	Amino Acid And Derivatives		44170	36240	44510	37150	47220	39800	36710	40560	35430	34670	38150	35140	57420	37520	45560	43600	51380	52580	54680	55360	49320	49450	45870	37340	38530	44300	45660	51470	46520	48640	41020	31920	31630	38840	37230	46230	39350	45400	42140	42280	38910	46220	38670
Com_530_pos	Histidinol	C6H11N3O	141.1	0.72	Amines	"4836-52-6"	1764000	2007000	1831000	1139000	1035000	1083000	1635000	1656000	1967000	1862000	1651000	1110000	918900	868600	939200	524000	547000	636300	931700	956500	745000	802900	842300	807200	644200	742000	678700	976400	965900	1179000	1303000	1482000	1340000	1038000	1185000	1231000	1265000	1263000	1304000	1864000	2532000	2497000	1310000
Com_531_pos	Deoxynojirimycin	C6H13NO4	163.173	0.73	Organoheterocyclic compounds	"19130-96-2"	117700	91250	107200	50370	37180	68990	84500	71360	56530	50680	76480	69100	87460	82540	86500	64430	75890	104100	88760	84070	91490	76680	97290	79260	70960	49250	43580	62790	50360	45250	57930	48670	58070	27670	21470	37370	37410	32010	35450	51350	31390	35110	25190
Com_532_pos	delta-Tridecalactone	C13H24O2	212.3	9.2	Fatty Acyls	"7370-92-5"	585200	935700	415700	9953	61066	9810	44090	10150	32080	8340	18250	15810	462300	473500	416100	159400	119300	124000	352100	519200	697700	240600	217700	209600	120500	113300	123700	120200	144300	176900	194900	204000	222200	117300	123500	101500	123000	105000	68640	253700	390600	152700	133500
Com_533_pos	Caffeic aldehyde	C9H8O3	164.1	1.84	Phenylpropanoids and polyketides		2855000	2624000	2774000	66130	38140	78150	139400	184400	121000	50230	46080	40710	1194000	1083000	1276000	613900	636300	755200	264000	392600	313300	878300	969800	1127000	495800	419700	516200	225500	505200	175800	272500	228600	197000	72640	72420	93460	153500	146500	153900	268400	265700	218000	108300
Com_534_pos	MAG (18:2)	C21H38O4	354.1	14.64	Glycerolipids		38630	76850	41940	5581	2651	3475	1883	2153	5763	2580	13511	4224	34560	33820	35320	43060	18400	28990	18870	44670	111300	30650	27610	18030	14210	25610	6127	17210	9318	23870	8252	10330	13900	11160	18240	11920	3612	6907	5600	6557	5629	3063	4637
Com_535_pos	LysoPC 16:1	C24H48NO7P	493.3	11.57	Phospholipid		3166000	4490000	3056000	131400	58780	130300	323200	319800	409000	174300	251200	309100	2223000	2351000	1933000	551500	410900	456100	997500	1312000	1400000	933700	1154000	847000	264000	341000	402700	310300	402200	279700	634800	576500	385700	285800	542100	264800	261000	228300	186500	317300	446700	215400	147600
Com_536_pos	Dl-Alanyl-glycine	C5H10N2O3	146.144	0.84	Amino Acid And Derivatives	"1188-01-8"	322800000	313600000	325800000	78160000	62560000	80630000	98880000	122800000	106800000	45530000	46070000	48420000	255200000	252400000	257700000	229400000	228400000	242200000	146000000	161700000	130300000	191600000	190800000	206800000	194700000	170400000	175900000	119700000	122600000	110900000	120800000	120300000	102600000	36530000	39290000	36370000	133600000	136000000	122100000	155200000	161300000	153200000	66300000
Com_537_pos	Dl-Indole-3-lactic acid	C11H11NO3	205.21	4.87	Indoles and derivatives	"832-97-3"	57160000	49030000	50240000	1445000	1058000	1538000	5890000	7856000	6327000	2212000	1817000	2261000	11790000	9851000	11370000	13610000	12830000	15150000	2796000	3692000	3272000	10300000	11880000	14340000	14760000	11000000	12650000	2152000	5044000	2015000	2738000	2446000	2211000	2348000	2579000	1910000	2027000	1804000	1773000	2386000	2679000	1946000	777300
Com_538_pos	DL-Leucine	C6H13NO2	131.173	2.3	Amino Acid And Derivatives	"328-39-2"	8120000	6912000	7654000	310000	178600	315900	559800	556600	568600	244200	317500	254400	3297000	3232000	3111000	1853000	1970000	2133000	1148000	1414000	1163000	1739000	1845000	2168000	1470000	861800	962100	658300	837500	526900	590400	575100	567900	167000	206500	166800	560700	528000	477200	817600	898600	683900	242700
Com_539_pos	Dl-Norleucine	C6H13NO2	131.173	0.9	Amino Acid And Derivatives	"616-06-8"	567400	365500	386100	764300	631400	748900	2438000	1747000	1817000	957600	1229000	1051000	737400	1445000	621200	488300	452700	586700	1266000	1294000	1093000	542500	338900	432800	958000	454300	472600	624300	643700	664300	598500	723200	1093000	357800	380600	392700	819800	662500	677700	1661000	2834000	1830000	714300
Com_540_pos	Proline	C5H9NO2	115.131	0.96	Amino Acid And Derivatives	"609-36-9"	39520000	38330000	35700000	4139000	3123000	4155000	2773000	2798000	2835000	1499000	1593000	1512000	6763000	5327000	7202000	3871000	3339000	3717000	7043000	7366000	7118000	4387000	4059000	3998000	3140000	2196000	2386000	5978000	7217000	5505000	2140000	2217000	1885000	907300	901100	835500	5920000	6112000	5389000	2985000	3247000	3033000	1100000
Com_541_pos	Valine	C5H11NO2	117.146	1.09	Amino Acid And Derivatives	"516-06-3"	105300000	96850000	101100000	10840000	5857000	11070000	7535000	8058000	7635000	3890000	4624000	3427000	48770000	48070000	47370000	28910000	30720000	30660000	22930000	27500000	23310000	24740000	27680000	34390000	22220000	17780000	17910000	20150000	24270000	18400000	8957000	8699000	10290000	2680000	3189000	2681000	20640000	22600000	15520000	11050000	11580000	9785000	3458000
Com_542_pos	Ergothioneine	C9H15N3O2S	229.299	1.03	Amino Acid And Derivatives	"497-30-3"	102100	48510	60000	59570	26670	27770	35650	49150	44870	54870	75410	50470	43598	38050	40700	50720	26470	12800	21180	7947	15890	39390	52450	57720	27840	22590	32490	56260	31320	24810	43990	30630	55330	17570	18630	36170	23190	12690	27660	56180	29850	50810	16150
Com_543_pos	Glutamine	C5H10N2O3	146.145	0.81	Amino Acid And Derivatives	"585-21-7"	460700000	452500000	476200000	95550000	74210000	89260000	124900000	143900000	126300000	52580000	57040000	54920000	373800000	373700000	367400000	332200000	333000000	358900000	183500000	205100000	165800000	265900000	267300000	284100000	269700000	236800000	237700000	154600000	149600000	149700000	148300000	155600000	133800000	42780000	44850000	38380000	164400000	167000000	155200000	210400000	214500000	189800000	77460000
Com_544_pos	Triethyl citrate	C12H20O7	276.28	9.15	Organic Acid And Its Derivatives	"77-93-0"	404800	451700	277100	160600	171300	154400	146400	150400	145400	160000	172500	160500	285500	446300	356200	219700	164400	214000	332700	330700	326800	264800	303600	346000	189000	215300	180300	201800	202500	204700	182800	270000	248700	223000	140000	159300	186800	207300	189500	241900	153800	311900	157700
Com_545_pos	7,8-Dihydroxyflavone	C15H10O4	254.24	8.141	Flavonoids	"38183-03-8"	123200	89260	125500	7935	2333	36631	65490	84960	110500	81300	126700	72770	83220	43420	30150	30620	40360	46670	14670	43307	18710	30690	43890	61650	67320	69440	50350	15360	38688	4532	34670	37410	28440	18750	37890	39230	31646	11910	4671	48230	30780	16380	19670
Com_546_pos	L-Glycyl-L-phenylalanine	C11H14N2O3	222.1	4.97	Amino acids and derivatives	"721-66-4"	344400	243400	530200	41060	12940	32490	52840	26510	35570	13280	33270	29530	527400	396800	299300	108600	90360	88990	412300	459400	411300	272800	194200	179200	163100	75020	135500	233200	310100	166100	131600	108300	148900	58270	70430	60660	139700	128700	110900	135800	181400	124500	86660
Com_547_pos	Cyclen	C8H20N4	172.27	0.71	Amines	"294-90-6"	79910	85240	83220	75310	51500	58430	86000	66200	49410	68530	70190	68340	97890	107200	95820	104800	70100	56730	84510	68170	87730	101600	92330	102900	77220	56010	72800	58350	60100	35590	59090	59670	57910	39170	36560	33380	46920	47050	14890	45650	31700	45910	40070
Com_548_pos	Tropinone	C8H13NO	139.19	1	Alkaloids and derivatives	"532-24-1"	2799000	2796000	2226000	108235	72720	104738	26890	40810	28010	71180	94920	58090	533500	483700	508800	189500	165600	239100	20960	43890	28950	271600	244600	230000	156000	142900	180200	151719	43270	143894	61820	54150	54280	44530	56200	63490	138474	6819	143837	60430	33610	25590	24930
Com_549_pos	N1,N10-Dicoumaroyl spermidine	C25H31N3O4	437.53	6.24	Cinnamic acids and derivatives		11970	22751	21960	6703	18510	15815	14260	56030	35610	13998	12190	24840	17430	7156	8461	6271	9528	4078	7612	8543	5467	5496	9136	10820	9295	7933	19620	6893	3946	4112	3697	5521	6982	4218	10780	4151	5445	3312	5190	11040	9770	10970	6087
Com_551_pos	S-ribosyl-L-homocysteine	C9H17NO6S	267.3	0.91	Amino Acid And Derivatives		245400	247100	349300	482500	372300	411100	245000	289200	309700	209800	171300	208900	151800	117600	140500	151200	89820	90290	343300	398700	333700	103200	128200	141400	85240	85050	72230	533900	505600	556500	164000	185600	159600	50300	91520	106400	624800	882600	662400	314100	435500	240400	167300
Com_552_pos	1-Methylhistidine	C7H11N3O2	169.18	0.84	Amino Acid And Derivatives	"332-80-9"	57650	56610	52760	28120	27460	35000	47170	40910	40060	31990	56840	45520	46630	57460	44560	50150	27230	46830	27790	49090	51650	47850	40000	60620	44000	26140	38480	57490	34230	13650	45300	30990	33300	20390	24650	22140	53470	15000	20740	41380	36820	22620	29020
Com_553_pos	beta-Nicotinamide adenine dinucleotide phosphate	C21H29N7O17P3	744.41	1.03	Nucleotide And Its Derivates	"53-59-8"	177100	160700	27950	143700	62290	148800	70920	108600	68830	106900	103400	34510	49440	7075	47949	33012	27129	32193	25890	58640	53380	35356	21900	42674	32270	28453	23097	17960	20680	48190	46641	40636	29315	20461	25038	24375	41150	21570	33050	22510	33417	33147	29543
Com_554_pos	gamma-Glutamylglutamic acid	C10H16N2O7	276.243	1.05	Amino Acid And Derivatives	"1116-22-9"	466900	543100	491300	375500	175300	296500	262900	289900	347800	142800	133200	132800	246900	212000	241900	215400	219800	289700	493700	530800	495200	233300	224600	273000	274500	179700	200000	437200	453600	352000	274600	330800	279600	127500	124600	104300	401400	434900	346400	381300	330800	305200	121900
Com_555_pos	4-D-Hydroxysphinganine	C18H39NO3	317.507	9.54	Amines	"554-62-1"	43240	51700	41330	56580	47670	48250	48090	44880	42150	36130	47120	37250	54420	40560	42180	38390	47770	47680	42140	40360	38020	40390	47720	44730	48630	64710	41000	47680	50590	52530	45870	47000	41210	33740	44320	55370	43840	54850	38470	57240	70200	50880	49670
Com_556_pos	Trimethyllysine	C9H21N2O2	189.275	1.03	Amino Acid And Derivatives	"66989-56-8"	2729000	2466000	2579000	3124000	2408000	2582000	1192000	1387000	1457000	1074000	872600	748300	1306000	1362000	1304000	1358000	1335000	1393000	3572000	3492000	3333000	1212000	1247000	1283000	1434000	1441000	1257000	2725000	2582000	2695000	1168000	1299000	1038000	875500	1082000	971100	2732000	2716000	2656000	1389000	1326000	1307000	890200
Com_557_pos	L-Tryptophan	C11H12N2O2	204.23	4.894	Amino Acid And Derivatives	"73-22-3"	110200000	104600000	104100000	3855000	2757000	4268000	16270000	21290000	16560000	6034000	5245000	5967000	30540000	27680000	27960000	33720000	32590000	40000000	6881000	9874000	9313000	26580000	29860000	35580000	37430000	31420000	33800000	5988000	13670000	5227000	7296000	7128000	6030000	6290000	7437000	5821000	5371000	5389000	5012000	6550000	7657000	5255000	2086000
Com_558_pos	Pipecolic acid	C6H11NO2	129.16	1.042	Amino Acid And Derivatives	"535-75-1"	172000000	167500000	166200000	40950000	30600000	44230000	31510000	38250000	33200000	16520000	17980000	16460000	88750000	89800000	94750000	80030000	74230000	89200000	50410000	56100000	46630000	62920000	63820000	73820000	60020000	51450000	47190000	42720000	36050000	39560000	32050000	35840000	29930000	11850000	12000000	11810000	41370000	40060000	42010000	46240000	45970000	41060000	17290000
Com_559_pos	L-Pipecolate	C6H11NO2	129.16	1.049	Amino Acid And Derivatives	"3105-95-1"	13940000	12840000	12820000	2849000	2181000	2943000	2066000	2468000	2193000	1000000	1227000	1126000	6383000	6824000	6628000	5461000	5528000	6151000	2962000	3398000	2930000	4311000	4515000	5011000	3972000	3186000	3301000	2845000	2442000	2612000	2221000	2496000	1839000	765200	810400	779500	2726000	2613000	2774000	2988000	2934000	2721000	1115000
Com_560_pos	Glutathione	C10H17N3O6S	307.32	1.51	Amino Acid And Derivatives	"70-18-8"	36300	19460	46590	86850	31320	95600	65830	48900	72420	40450	51860	55610	21840	18180	22120	6906	7629	7572	59140	99270	44690	21760	25300	30020	15650	6669	7233	152600	109900	116500	30960	97060	64020	14810	30074	5820	126200	90430	68850	64700	73940	62360	21140
Com_561_pos	7-(2-Hydroxyethyl)theophyline	C9H12N4O3	224.217	1.17	Alkaloids and derivatives	"519-37-9"	27770	46880	27340	50880	45870	28030	35250	18130	25020	18780	17760	20468	45010	32440	21880	52270	20390	22210	77890	105700	77790	24940	28330	22710	17930	15660	39810	38490	51950	26310	24720	22220	26770	23930	23361	22290	17370	34260	40690	37800	27200	10410	18000
Com_562_pos	5-Sulfanyl-1-pentanesulfonamide	C5H13NO2S2	183.29	15.17	Amines		57210	30530	82690	138200	75850	115100	66160	74530	65640	70650	65920	69400	90040	70940	66590	53400	82020	76350	128800	93260	80160	78240	94330	80940	68950	53440	61440	137100	138200	136000	62690	64560	65710	69340	68040	81500	105500	123300	139400	64420	64420	80670	65750
Com_563_pos	4-Pyridoxate	C8H9NO4	183.161	2.91	Pyridines and derivatives	"82-82-6"	98020	88020	91000	105200	60260	111900	121700	105500	120100	232700	303900	260600	45660	42230	36230	34240	38280	38150	207300	222300	211500	32680	35150	37170	38340	33300	27390	114000	111100	103600	37880	36990	38840	50370	57700	43620	96470	103400	84190	54780	66860	50680	41220
Com_564_pos	4-Pyridoxic acid O-hexoside			1.66	Vitamins		29870	22900	31320	231300	107100	260000	76510	65180	83900	35010	52330	41290	42880	41810	37630	39210	36410	41840	180000	133600	137000	50460	51990	27540	56330	34480	32420	169900	187700	155600	59970	80290	56890	23410	45510	46330	188700	171200	128900	76990	51950	32640	22850
Com_565_pos	Syringetin 3-O-hexoside		508.1	0.98	Flavonoids		26770	20975	9474	15160	18210	19400	7455	7480	7866	12200	6143	8390	37150	23250	13800	13940	6108	10480	32150	30280	30320	16850	17030	10750	10780	21740	29490	33270	53760	37810	27310	20700	12430	37130	47110	14950	29650	43130	62600	18080	34940	20020	47090
Com_566_pos	C-hexosyl-luteolin O-hexosyl-O-pentoside		742.1	0.72	Flavonoids		145800	103300	98830	39490	21710	44460	112400	113200	107300	128200	133600	106300	103800	92460	102300	25700	21730	25670	60720	67610	85060	83460	105700	107300	41000	14800	24210	73600	37480	32570	97370	137000	85470	25170	32600	15820	28730	25670	31110	214200	163000	124600	48380
Com_567_pos	O-Phosphocholine	C5H15ClNO4P	219.604	0.87	Cholines	"107-73-3"	11200000	11060000	10610000	10010000	6597000	8705000	10110000	11260000	11500000	6397000	6675000	6067000	5930000	6814000	6588000	3938000	3915000	4515000	4344000	5072000	4810000	6514000	8047000	8618000	4539000	4385000	4315000	5075000	4435000	4408000	4426000	4585000	4890000	3125000	3310000	2892000	3650000	3086000	3562000	3034000	3059000	2836000	1671000
Com_568_pos	Pyridoxine O-glucoside	C14H21NO8	331.323	1.68	Vitamins		667600	742700	683700	1436000	740600	1487000	1566000	1579000	1621000	1511000	1903000	1427000	348200	420700	425100	309700	323200	402500	677800	664100	614500	248800	302300	417500	342600	356500	234400	351200	402100	320000	260300	312600	187400	439200	376800	343600	275300	292100	246400	414000	218300	206300	255100
Com_569_pos	Benzamide	C7H7NO	121	4.56	Benzene and substituted derivatives	"55-21-0"	20820	32180	22860	14120	9151	17230	11050	12440	9630	9550	11000	20330	22440	32400	19080	12210	11490	13380	12150	10540	9677	19160	8441	23120	12720	6486	17860	11580	11880	18670	9500	9692	10400	7863	12570	10880	12640	4910	11390	9322	24120	12360	6978
Com_570_pos	O-methylnaringenin C-pentoside	C21H22O9	418.1	0.72	Flavonoids		409100	355200	303700	394500	196900	537300	454000	398300	490000	483700	679900	643000	513800	594600	488200	203500	273300	303600	493200	526400	519000	297400	374000	397300	437400	169700	108700	442900	234800	311100	498400	590300	346700	172500	144100	138500	365200	333700	274900	533700	538500	572900	271900
Com_571_pos	Methyl chlorogenate	C17H20O9	368.34	6.24	Alcohols and polyols	"123483-19-2"	147300	196500	85110	316400	597100	284600	16970	111000	49820	37470	35980	53680	88750	157500	130600	40080	141600	117300	167000	217100	259300	141600	103300	230600	59420	86470	49010	186600	214400	204000	70540	262500	144400	84200	116000	162800	241300	143900	205300	138700	85800	83890	34410
Com_573_pos	N-Feruloyl spermidine		320.1	17.03	Cinnamic acids and derivatives		172200	136800	186700	151100	178900	141200	144100	144900	130600	142800	147500	142300	193800	132000	181400	152000	204500	201500	216700	182800	204500	200300	152000	172900	143900	164500	187700	193500	191600	153100	170300	148100	133300	134200	158100	150800	165600	186600	154600	183200	174500	195800	137600
Com_574_pos	N-Caffeoyl putrescine	C13H18N2O3	250.1	4.56	Cinnamic acids and derivatives	"29554-26-5"	8222000	9158000	2883000	5409000	21010000	8142000	161700	11140000	1365000	14640000	7612000	2937000	256700	462300	431500	416100	311300	348100	85730	126500	80880	254700	328000	469100	234700	349500	357200	67300	44920	33620	213200	238900	154500	38990	66380	17660	84710	33090	47930	237400	229200	278700	127600
Com_575_pos	O-Feruloyl 4-hydroxylcoumarin	C19H14O6	338.1	17.01	Cinnamic acids and derivatives		282100	205400	290800	246100	243400	242900	200800	266400	210700	229400	226900	228400	302600	233400	271400	272600	304700	299000	331300	280800	326300	279600	248400	241100	238000	259600	262100	272400	291100	277500	252700	214400	204100	239500	245500	265800	273100	283400	268900	276200	260400	310300	238200
Com_576_pos	Aminopurine	C5H5N5	135.1	1.24	Purines and purine derivatives		4063000	2886000	5516000	65190	44450	104600	713500	72790	579700	603100	1085000	798600	10810000	6794000	4291000	3292000	3479000	3130000	3027000	2764000	3075000	4595000	1798000	1840000	3215000	2398000	2673000	2359000	1935000	2467000	1501000	1730000	2597000	1865000	2443000	2993000	1552000	1591000	1200000	1256000	2240000	1961000	5503000
Com_577_pos	2-Aminoadipic acid	C6H11NO4	161.1	0.95	Amino Acid And Derivatives	"1118-90-7"	168900	173400	149100	181700	91580	115600	108500	57260	88320	99820	123700	118400	50540	78800	55840	66570	133300	105400	124000	98980	124400	47020	25980	45070	31060	44010	28010	127600	100600	177400	16900	30390	30570	65510	62880	44840	88060	111600	86760	43410	59240	67390	66380
Com_578_pos	Aspartic acid di-O-glucoside		457.1	0.97	Amino Acid And Derivatives		35850	32110	9618	17670	50950	16610	1607	8517	2679	7121	7748	4822	2133	9078	4259	3213	1073	3742	11220	6403	1592	527	532	530	8383	1067	6823	1072	26270	17130	5335	2161	2667	5512	2123	4569	19780	2676	13390	1058	5650	2663	5765
Com_579_pos	Glucosamine sulfate	C6H15NO9S	277.25	0.79	Carbohydrates And Its Derivatives	"29031-19-4"	1327000	1101000	1152000	715200	609700	928600	1165000	890200	725600	551900	805400	997600	1142000	1188000	1337000	1011000	1000000	875100	1110000	1227000	1204000	1164000	1185000	1191000	707300	606900	585100	683600	625900	450500	490600	504300	461500	283800	355100	321700	269000	228000	302800	375500	285600	297800	263600
Com_580_pos	Trigonelline	C7H7NO2	137.136	1	Alkaloids and derivatives	"535-83-1"	4993000	5140000	4480000	21670000	14860000	20660000	14680000	11390000	16480000	6720000	7594000	6781000	3301000	3553000	3483000	3495000	3795000	4546000	10920000	10220000	10510000	3221000	3555000	3672000	3360000	3280000	3020000	18590000	17090000	16370000	8511000	8675000	7972000	2792000	2930000	2684000	19960000	20710000	18830000	11580000	12210000	11180000	4880000
Com_581_pos	Fragransin A2	C20H24O5	344.408	10.56	Lignans	"112652-46-7"	10890	23560	15050	2216	9975	8429	7367	3213	7212	10545	7858	6945	6381	11720	17100	2848	2669	7127	9042	6267	7240	4975	6349	4131	7424	7229	3706	7351	6778	2863	4244	5834	6502	5924	6105	1877	6934	6961	5945	2802	6815	7344	8624
Com_582_pos	N alpha-Acetyl-L-Arginine	C8H16N4O3	216.238	1.04	Amino Acid And Derivatives	"155-84-0"	301600	272000	301100	12160000	6901000	8575000	756200	735200	734300	238300	331700	314800	382700	419600	386800	187300	209300	221500	14080000	12300000	10850000	454900	574800	584300	214400	159200	211600	12670000	11420000	11560000	1037000	1211000	939900	349100	354300	313000	10760000	11620000	9928000	1062000	1108000	1117000	502500
Com_583_pos	N-p-Cinnamoylputrescine	C13H18N2O	218.29	13.23	Cinnamic acids and derivatives		204100	193500	163600	171500	190300	186900	197600	191000	161600	179000	197200	196300	176300	177000	181400	162400	180600	174500	187400	190800	165100	179800	192600	182000	141700	164100	173500	142000	191800	171000	160700	166900	146500	167300	154500	166800	180300	176800	154300	168100	195200	175700	137000
Com_584_pos	N-p-Cinnamoylagmatine			12.67	Cinnamic acids and derivatives		553900	1035000	205400	17194	15116	17896	108178	85274	113384	45582	52588	53166	196800	400800	442000	39370	22180	20080	43500	83350	137200	39050	83940	21210	9571	40760	8235	18830	39713	31383	12770	45757	38855	13160	22083	13330	27018	15500	24397	56297	5043	5381	20695
Com_585_pos	N-p-Coumaroylspermidine	C16H25O2N3	291.39	6.78	Cinnamic acids and derivatives		326900	316600	275400	55279	16050	55557	198300	247900	249000	156000	122600	141000	99620	130900	89480	65900	110000	68250	28560	58520	50950	115000	147600	141800	73350	44360	57810	21260	22770	21150	134200	118100	90420	56080	76210	35150	14910	5420	36742	130600	93800	103200	80330
Com_586_pos	N-Sinapoylagmatine	C16H24N4O4	336.39	12.6	Phenolamides		91220	18140	67240	23090	19870	15880	8689	7786	16490	22929	8908	6896	36390	42580	65080	30930	32640	32630	26180	45140	29240	21720	33880	20140	14940	29680	24560	39650	40840	28420	37790	10260	13580	17390	20870	21100	26730	52120	31160	23455	19490	10880	15230
Com_587_pos	5-Methylcytosine	C5H7N3O	125.13	0.991	Nucleotide And Its Derivates	"554-01-8"	45190	56970	67450	60530	25950	42730	55370	76610	48100	47520	46920	47570	43180	24220	35910	19140	25020	26340	83940	97820	46210	20260	37580	48450	25120	29230	21140	42560	32970	25400	43640	50230	34210	18000	63740	35030	35000	44770	23470	61240	34220	55280	34300
Com_588_pos	Glycyl-L-leucine	C8H16N2O3	188.22	4.466	Amino Acid And Derivatives	"869-19-2"	350800	298100	502100	50370	33120	43880	44670	28340	45750	28400	30920	26130	316500	252200	219800	85490	67660	71680	807400	845400	812200	151600	97150	127200	171000	53570	73340	472500	472900	361900	134500	99110	162300	54530	81210	61680	282200	279800	212400	164700	215600	133600	105000
Com_589_pos	L-Alanine	C3H7NO2	89.09	0.86	Amino Acid And Derivatives	"56-41-7"	2208000	1996000	2099000	4038000	2638000	3859000	1300000	1209000	1284000	666000	637600	612300	2330000	2115000	2051000	1177000	1100000	1130000	2203000	2337000	2260000	1494000	1432000	1660000	1040000	751000	863500	3511000	3742000	3487000	1270000	1240000	1169000	501800	575900	556500	2726000	3016000	2747000	1134000	1211000	1045000	635400
Com_590_pos	L-aspartic Acid	C4H7NO4	133.1	0.86	Amino Acid And Derivatives	"56-84-8"	8576000	8042000	7757000	31300000	21900000	28850000	15120000	15050000	15230000	11470000	12100000	11300000	9312000	9243000	8643000	7345000	7159000	7910000	18940000	19580000	19420000	8098000	8766000	8597000	7776000	7091000	7463000	25450000	27490000	25780000	13140000	13370000	12640000	7725000	8497000	7870000	28180000	27540000	25850000	13200000	12990000	12200000	10210000
Com_591_pos	DL-Citrulline	C6H13N3O3	175.19	0.9	Amino Acid And Derivatives	"627-77-0"	27090000	23450000	26570000	23090000	15660000	22660000	17590000	17180000	16220000	10620000	11130000	10250000	7216000	7314000	7202000	4694000	4594000	4722000	6830000	6544000	6642000	6163000	6661000	6873000	5405000	4261000	5945000	34080000	30870000	29610000	24440000	26840000	24940000	7256000	7234000	7685000	43740000	39990000	38760000	46910000	51400000	46890000	18870000
Com_592_pos	beta-Nicotinamide Mononucleotide	C11H15N2O8P	334.219	0.993	Nucleotide And Its Derivates	"1094-61-7"	5272000	3868000	4495000	864100	416900	1159000	2783000	710100	1954000	1031000	2937000	1818000	1374000	2130000	2183000	258100	342500	518600	12040000	15020000	17220000	1952000	2931000	2091000	318200	216500	268700	11760000	9434000	15240000	1335000	2612000	919100	232300	127700	123700	14060000	12870000	14560000	1410000	1753000	1706000	531900
Com_593_pos	L-Hydroxyproline	C5H9NO3	131.13	0.88	Amino Acid And Derivatives	"51-35-4"	2082000	2094000	2229000	341700	181400	341600	148400	248000	188200	85290	108500	100500	585300	629100	760900	613000	490400	570400	582000	573400	502700	274000	426200	386500	474100	435900	416700	412000	377400	368300	156100	172300	173300	142300	203600	112700	342700	410700	308100	207100	189100	206800	105300
Com_594_pos	D-Proline	C5H9NO2	115.13	0.967	Amino Acid And Derivatives	"344-25-2"	58850000	61580000	56620000	5675000	4786000	6197000	4298000	4375000	4327000	2399000	2894000	2332000	10680000	10290000	11270000	6420000	5897000	6768000	11660000	12860000	12190000	7206000	7055000	7596000	5255000	3443000	4284000	8742000	11140000	8938000	3153000	3095000	2914000	1345000	1415000	1227000	7966000	8864000	8373000	4447000	4643000	4822000	1648000
Com_595_pos	L-arginine	C6H14N4O2	174.2	0.794	Amino Acid And Derivatives	"74-79-3"	30560000	27710000	28390000	3276000	2846000	3023000	3062000	3614000	3523000	2346000	2430000	2424000	13720000	13660000	14710000	4603000	5195000	4875000	17500000	20460000	17720000	6503000	6702000	7594000	3384000	1921000	2318000	7101000	6815000	6701000	2850000	2807000	2650000	771500	886800	833000	9596000	11120000	10010000	4413000	4692000	4775000	1120000
Com_596_pos	L-cysteine	C3H7NO2S	121.16	0.88	Amino Acid And Derivatives	"52-90-4"	41320	37030	32300	40570	19450	37320	7733	19100	18350	7093	9139	7292	23520	24450	33120	21750	20970	24850	33050	36960	20760	29190	17860	25780	22750	21330	16110	40690	56820	52910	23680	21370	20570	2994	4875	8496	26530	45520	35150	18090	24130	25720	6588
Com_597_pos	Isohyperoside	C21H20O12	464.095	5.91	Flavones and Flavonols	"35589-21-0"	446400	435700	431200	152800	154000	154700	48270	719400	114000	247000	197900	177200	198800	89810	102300	39360	31860	45510	140400	293800	112000	55660	89420	81570	50450	98620	62960	57600	48340	53660	35150	61130	73470	44480	35640	40120	24940	42660	54720	84120	44080	81870	16810
Com_598_pos	2'-Deoxyinosine 5'-phosphate	C10H13N4O7P	332.052	1.71	Nucleotide And Its Derivates	"3393-18-8"	58360	57790	50140	64280	37310	83980	35220	54370	57980	33280	42200	43760	19861	6235	11220	10370	11080	14420	17660	50620	25120	12708	19570	11400	12170	14491	30617	15680	12360	26800	13840	15065	6962	4178	24850	17514	27930	14450	22080	8029	19138	10300	6601
Com_599_pos	L-Alanyl-L-Phenylalanine	C12H16N2O3	236.116	4.65	Amino acids and derivatives	"3061-90-3"	189000	136100	258800	24590	3247	13380	42360	10070	29970	11230	14950	14730	292000	240500	149700	86720	74160	71920	234500	298200	306600	96900	61510	85470	60280	59260	73230	131100	150300	63790	125500	94980	166300	65090	78810	61130	172300	140500	156200	221500	262500	154500	138900
Com_600_pos	5-Aminoimidazole ribonucleotide	C8H14N3O7P	295.056	0.87	Nucleotide And Its Derivates	"25635-88-5"	1986000	1929000	1619000	2535000	1740000	2681000	1778000	1614000	1841000	566900	841300	955400	2804000	3221000	3169000	3515000	3291000	4076000	5666000	5014000	5260000	3557000	3803000	3297000	2553000	2656000	2472000	3209000	2291000	3090000	3141000	3210000	2455000	1372000	1723000	1390000	1847000	2142000	1576000	3377000	3704000	2499000	1597000
Com_601_pos	Isomangiferin	C19H18O11	422.085	1.51	Xanthone	"24699-16-9"	758300	594100	674200	2754000	2320000	2897000	3118000	3292000	2669000	2216000	2898000	2982000	337600	322700	323400	1180840	1075580	40090	1486000	1628000	1597000	522800	447000	492300	1251500	1120150	1052480	2786000	2515000	2345000	2539000	3191000	2555000	271700	377000	314500	2439000	2460000	2770000	4023000	2945000	2480000	1655000
Com_602_pos	HBOA	C8H7NO3	165.042	4.15	Organoheterocyclic compounds	"23520-34-5"	142100000	125500000	142000000	26680000	15840000	29130000	20080000	21140000	21560000	8772000	11640000	10270000	123700000	120800000	118100000	86600000	88340000	92490000	50010000	58090000	52060000	74450000	74390000	91240000	75460000	47580000	55840000	64070000	78830000	57650000	28100000	29250000	27610000	11050000	12770000	11360000	55050000	56750000	51240000	36050000	39560000	34360000	14230000
Com_603_pos	Cyclo(Tyr-Ala)	C12H14N2O3	234.1	0.97	Amino acids and derivatives	"21754-26-7"	26110	24930	26220	10720	5974	9222	5798	8365	10100	11250	10310	6906	25750	19590	15880	27920	13210	11980	52790	30470	48520	10410	11180	14830	56580	8994	20550	22420	42110	15870	10700	11716	14350	9462	8961	17980	16370	8750	14410	17830	15820	12660	14810
Com_604_pos	10-Formyl-THF	C20H23N7O7	473.439	4.83	Organoheterocyclic compounds	"2800-34-2"	109800	81510	86920	37890	12270	43320	47470	60320	72770	66120	105400	84600	32710	50750	41370	30980	27850	31960	92480	79530	61480	38950	33260	44900	49170	45130	31020	46970	48330	44270	51370	43950	45950	40470	46200	41450	32800	27600	24600	52630	49480	51400	34940
Com_605_pos	Cinnamic Acid	C9H8O2	148.16	0.87	Cinnamic acids and derivatives	"621-82-9"	6795000	5864000	5775000	11590000	7515000	10940000	4431000	5085000	4799000	3712000	3755000	3490000	3631000	3621000	3607000	2764000	2748000	3272000	6457000	6425000	6658000	3036000	3947000	4094000	2600000	2411000	2379000	5880000	5651000	5763000	3588000	3972000	2874000	2292000	2334000	2177000	5401000	5409000	5215000	3116000	2735000	3049000	2430000
Com_606_pos	14,15-Dehydrocrepenynic acid	C18H28O2	276.414	12.15	Fatty Acyls	"4154-44-3"	9670000	19920000	4093000	214000	114900	172600	159500	115100	289200	106400	265300	244500	4047000	8301000	7581000	1224000	732600	395500	5059000	4464000	8028000	1447000	4404000	608300	214400	1199000	272900	3118000	1005000	3227000	1606000	112400	204000	496200	793700	680500	376700	1427000	463100	84470	429500	92880	145700
Com_607_pos	Diethanolamine	C4H11NO2	105.136	0.84	Amines	"111-42-2"	402400	316800	363800	617300	361700	538200	311300	303200	317000	164600	194600	167000	377300	332500	347700	280900	280100	283600	291300	312700	303400	281400	273500	315400	255400	212300	291400	454500	719400	436500	286700	248100	254500	109800	92410	141600	359600	375100	318700	251500	281700	273500	127600
Com_608_pos	16-Hydroxy-hexadecanoic acid	C32H62O5	526.832	8.57	Fatty Acyls	"871333-53-8"	411900	387800	440700	449000	382200	389700	422300	393500	380200	435000	382800	416800	425200	426200	398900	444300	457900	382100	448200	378000	389600	433200	449800	399000	421100	417500	395600	393900	448500	436100	402300	409200	427300	433200	431100	426800	382300	374200	439300	478800	477800	481500	469600
Com_609_pos	Diosgenin	C27H42O3	414.621	11.39	Terpene	"512-04-9"	15410000	13920000	12650000	13090000	7090000	12430000	13180000	13680000	11990000	11610000	13770000	15070000	15100000	15480000	14940000	13750000	14030000	12910000	14700000	13410000	17520000	11910000	14630000	12640000	13040000	14680000	15440000	13770000	15840000	15230000	16780000	13440000	14470000	14420000	15720000	12990000	14830000	17720000	13470000	13490000	12500000	13190000	11320000
Com_610_pos	DIMBOA glucoside	C15H19NO10	374.108	4.26	Carbohydrates And Its Derivatives	"18607-79-9"	109500	99350	125400	73880	41430	58160	149700	146800	136500	45240	56170	43440	69950	91970	85080	13220	6461	10990	326200	314400	323700	78790	87670	88020	14820	14470	8919	90360	118000	78890	78640	110200	74160	16480	14820	14040	90220	65020	70140	121800	122600	115300	38140
Com_611_pos	O-Feruloyl coumarin			5.6	Cinnamic acids and derivatives		773600	1103000	502400	149700	144200	139200	16400	643200	142800	715000	474800	237700	258600	308800	274300	691600	624400	745400	58920	104500	68060	81160	83490	164600	764800	488800	433600	6168	13300	13940	39450	77380	33190	356800	423500	326100	2244	4450	8530	35690	26750	53660	99780
Com_612_pos	N'-p-coumaroylspermine	C19H32N4O2	348.48	5.38	Cinnamic acids and derivatives		17270	12600	27750	12195	2767	12264	6727	11210	7581	17450	11740	12720	36950	39970	24280	17930	27600	45800	15700	13496	15657	18770	17270	13600	23170	14940	21340	11644	2319	14405	13440	14950	10970	13400	11300	10070	10240	11972	10025	11380	13590	19040	5955
Com_613_pos	Apigenin-6,8-di-C-glycoside	C27H30O15	594.518	5.73	Flavonoids	"23666-13-9"	40350	45380	71300	25160	14050	16330	24780	44940	21970	12440	8006	10620	25640	41480	33940	8342	3795	2656	81110	146200	144400	31910	31470	43980	5306	3769	13950	56380	82310	67110	23030	35860	27380	3426	4511	2640	53370	52490	29100	31970	22370	17070	13300
Com_614_pos	Myricetin 3-O-galactoside	C21H20O13	480.376	7.19	Flavones and Flavonols	"15648-86-9"	45930	89480	76400	74930	46110	91990	64560	81530	63770	104400	48390	95180	54100	66810	91550	73960	59880	46330	75750	87550	95070	71840	92760	59450	51470	66620	56140	52110	103500	51840	69460	72880	62660	47900	51800	42730	80000	66970	93280	90730	67220	75520	101300
Com_615_pos	3-Carbamyl-1-Methylpyridinium Chloride	C7H9ClN2O	172.612	0.98	Pyridines and derivatives	"1005-24-9"	2813	8706	11120	30160	20000	17730	14290	18140	17880	29350	17320	12918	9375	9230	11959	8902	11510	17520	6571	22780	15330	4488	2462	10880	5694	11980	4633	27890	16730	19360	21580	11690	9612	14010	10300	10340	16810	13380	11620	11000	14440	14130	14430
Com_616_pos	3-Methylcrotonylglycine	C7H11NO3	157.167	1.08	Organic Acid And Its Derivatives	"33008-07-0"	62720	35560	36680	15180	53070	23160	25230	18200	40630	18666	22239	6030	14420	22470	44830	6638	19690	3016	32730	28310	23910	15240	13440	11310	22630	6263	13430	15000	20820	22460	17402	28340	33530	15590	6121	15759	29150	14720	32300	41530	26770	35430	19550
Com_617_pos	4,6-Dihydroxyquinoline O-hexoside			1.09	Quinolines and derivatives		335700	336600	311100	37720	52660	62340	186900	167300	84870	154800	91780	155900	90980	67890	66090	45220	50380	56260	141200	185700	165700	68920	92870	127300	96960	64990	44470	54190	101100	66140	75050	44500	73270	55690	43680	41200	28690	25610	43710	89290	97970	78930	51330
Com_618_pos	4-Hydroxy-6-methylquinoline-3-carboxylic acid	C11H9NO3	203.194	13.14	Quinolines and derivatives	"35973-18-3"	226700	243900	250800	238200	235700	207300	254900	241200	230600	234900	227200	228000	254700	230300	228600	239800	244600	238600	272000	254800	240900	284000	227200	258500	258000	265400	258300	248100	230300	256700	256100	235200	232800	244200	251800	237300	227300	234100	231800	286600	264900	277600	291200
Com_619_pos	4-Ketolutein	C45H54O3	582.9	0.73	Carotenoids		31420	51700	44750	8877	3425	5883	54690	40940	25630	16240	31950	31090	35380	29040	17190	4889	10741	9483	11290	17700	14260	19670	22180	14790	3424	10810	3938	3433	4934	8799	22680	17230	10840	8448	4971	6884	8488	7877	4440	29060	33480	10310	2902
Com_620_pos	Phytocassane E	C20H28O3	316.435	10.75	Terpene	"181524-78-7"	6241	4759	13380	5377	2822	11860	11710	13580	2382	9551	14010	10780	7103	8620	11400	6106	16510	10760	5849	7449	6132	4729	14200	12620	14160	12610	14560	11090	9011	14800	4490	9275	14810	7370	20410	14060	19600	10020	21660	23530	9471	5716	5801
Com_621_pos	Pyridoxine	C8H11NO3	169.178	1.53	Vitamins	"65-23-6"	185700	143200	167300	180900	128600	172100	615100	840700	732500	556300	542300	610800	101800	64090	47880	55150	55310	77260	41000	28640	9596	20100	22380	34450	66370	70110	46350	16440	42590	17350	29240	33610	42930	74140	83320	66670	31800	14240	48310	63110	50560	62020	93090
Com_622_pos	Quercetin 5-O-hexoside			6.52	Flavones and Flavonols		163100	192700	161700	1987000	1124000	2101000	105800	588400	611700	412200	491200	270200	132232	108690	107405	74573	39260	32542	185847	228232	270362	72454	22337	46148	55940	40663	13050	33740	24280	70507	29990	24317	21129	36373	35084	10870	78154	53279	45560	64440	78650	22962	57050
Com_623_pos	4-Methyl-5-thiazoleethanol	C6H9NOS	143.1	3.95	Organoheterocyclic compounds	"137-00-8"	9246	7600	8923	8038	11056	9139	7139	3046	7951	6584	3078	3351	7065	11140	5332	3675	3370	4248	7375	8398	9572	6132	7041	6464	4213	3869	2636	3648	4660	6802	8280	7018	6148	7010	9524	3849	5859	3468	6888	6886	8223	10070	5920
Com_624_pos	Gallocatechin-gallocatechin		610.2	6.24	Flavonoids		327300	288700	345700	109300	86430	95120	60190	154200	216500	169800	89580	51630	175200	244300	201500	41460	30910	60970	299700	301400	375000	87900	119300	120400	48110	49350	71210	143400	91190	61340	71940	70820	71000	16320	35590	48540	33700	90340	32590	53780	77930	46780	50720
Com_625_pos	Feruloyltyramine	C18H19NO4	313	7.87	Cinnamic acids and derivatives	"66648-43-9"	26970	36240	12570	198100	209400	299800	23500	48690	31190	112200	114600	105800	15540	3079	2906	126400	68960	99300	65920	40390	49680	6493	2054	10540	106400	111600	182900	105700	187100	137400	29370	46870	22960	47480	80200	46460	122500	282100	94230	20660	27040	22760	43810
Com_626_pos	C-hexosyl-chrysoeriol O-rutinoside		770.1	0.7	Flavonoids		18690	21180	21220	3453	6625	21892	34240	36640	57060	16300	27210	16290	24180	10360	15290	5890	7008	1973	18300	9116	12830	5922	11330	20230	2452	9331	6884	4436	2472	7402	3472	20300	15860	4937	1973	7660	4441	3947	2477	13390	7414	18240	11959
Com_627_pos	5-O-p-Coumaroyl shikimic acid	C16H16O7	320.1	1	Cinnamic acids and derivatives		15020	20800	29280	9590	10400	10422	8523	12227	10064	3050	8015	9940	20730	17730	14190	11580	6430	11530	5791	9054	20830	6708	6891	5707	9923	3972	14305	9312	9724	12190	4457	4344	6103	5812	7923	2193	8838	7053	8439	2327	9605	6122	6669
Com_628_pos	Quercetin 7-O-rutinoside		610.2	6.4	Flavones and Flavonols		256500	241100	167700	2096000	1909000	2653000	98100	1368000	254200	554100	525900	294100	3603	10120	9052	10470	33010	4971	4177	4916	7536	18365	1804	5721	3629	27892	81910	81970	56180	31970	6353	14890	16762	14180	4036	4526	42700	36330	34900	44620	28550	65590	12570
Com_629_pos	LysoPC 18:3	C26H48NO7P	517.3	12.56	Phospholipid		743800	907400	1849000	417200	285200	374300	436100	312600	422500	292400	377100	325400	698800	722500	603000	528100	361700	450400	1765000	1604000	1938000	488300	408900	568300	327200	273800	375500	1144000	1490000	1061000	512200	578600	535000	422900	489300	507700	1172000	1081000	1191000	355700	610800	530800	504200
Com_630_pos	LysoPC 18:2	C26H50NO7P	519.3	12.14	Phospholipid		22280000	30040000	25840000	1025000	481000	839700	2847000	3285000	3976000	1466000	1836000	2535000	21120000	20550000	17500000	6730000	4777000	5595000	8362000	14690000	12880000	9485000	11830000	9173000	2849000	3553000	4085000	1789000	2333000	1739000	3163000	3622000	2580000	1657000	2668000	1657000	1606000	1316000	1074000	1802000	1587000	1355000	721700
Com_631_pos	beta-Alanine methyl ester hydrochloride	C4H10ClNO2	139.58	0.98	Amino Acid And Derivatives	"3196-73-4"	21020000	19070000	20930000	3183000	2697000	2968000	9703000	5850000	7411000	4246000	5572000	3974000	14530000	14100000	13030000	8330000	7435000	9258000	22070000	23530000	23860000	9499000	7202000	7665000	7138000	6220000	6780000	24560000	19910000	21430000	9679000	8595000	13060000	4432000	4573000	4340000	21480000	24790000	20540000	16090000	20060000	14710000	10570000
Com_632_pos	Adenine	C5H5N5	135.127	1.032	Purines and purine derivatives	"73-24-5"	1051000	788700	1347000	87530	23410	56070	234400	49260	177700	192300	459000	382500	2789000	1951000	788200	916700	1043000	711400	1446000	591200	1556000	1988000	367300	395900	842600	664100	850800	501100	435700	1268000	363800	403900	799500	541100	704000	879900	438700	602000	263100	348100	970600	857700	2381000
Com_633_pos	Xanthopterin Hydrate	C6H7N5O3	197.15	7.57	Organoheterocyclic compounds	"5979-01-1"	61550	82960	101600	217500	81430	35200	63680	99310	68440	81480	124600	44240	78530	88820	54790	59620	94670	181400	160500	95690	127000	56180	53880	64520	64030	59950	36310	89600	38620	67190	57330	77640	80790	52320	31610	58560	92160	91190	43630	80530	50240	143000	41260
Com_634_pos	Tanshinone II B	C19H18O4	310.347	10.795	Quinones	"17397-93-2"	790555	585754	827389	634070	626223	1211465	136396	238470	206987	164196	33130	110720	960700	692400	826500	242500	277200	159700	1567000	1939000	2286000	492600	365283	211800	221081	163300	155100	283300	572700	430000	118100	207791	248009	101600	162800	136800	297792	112000	79780	248945	295095	234428	156992
Com_635_pos	Allicin	C6H10OS2	162.27	7.57	Organic Acid And Its Derivatives	"539-86-6"	209000	204100	188200	193900	190400	203900	211700	144500	254200	201900	154400	208000	179000	188500	156600	143700	206800	144900	172100	271900	223600	165800	155800	274900	175600	165700	149000	171200	186200	206900	248700	161800	138500	160500	192300	144900	259900	184300	178800	192900	209600	192700	192700
Com_636_pos	Nicotinic acid-hexoside			0.97	Carbohydrates And Its Derivatives		13030000	8091000	11620000	1601000	1043000	1296000	2075000	2065000	2800000	2909000	2516000	2101000	3213000	4437000	3332000	6302000	7880000	11060000	2328000	2815000	3016000	5524000	5318000	3855000	5278000	6584000	5317000	1509000	1716000	2474000	2461000	1534000	2173000	3527000	4120000	2299000	1760000	1277000	1941000	2142000	1805000	2259000	1444000
Com_637_pos	Nicotinuric Acid	C8H8N2O3	180.161	3.42	Vitamins	"583-08-4"	101700	104400	102500	98640	43920	87540	44540	65260	52090	17240	26590	25260	42100	50150	53870	22380	9047	16360	312700	367500	296000	39430	47606	46210	19610	10320	19850	154500	141700	132000	40020	39430	24300	4941	9710	11340	77100	75190	70840	48010	22020	24560	9811
Com_638_pos	N-Feruloylspermidine derivative			13.17	Phenolamides		27810	46760	41720	14802	20764	13158	11510	18231	9279	5545	6790	8912	26250	10990	9293	41510	15840	20390	10470	7059	11260	12160	15450	7978	23780	21130	151100	11510	12320	14651	10990	3820	10590	12360	29600	25760	15949	14386	3399	2979	5925	4640	3877
Com_639_pos	N-Hydroxy-L-tryptophan	C11H12N2O3	220.225	2.66	Amino Acid And Derivatives	"87843-31-0"	238000	242500	216500	9449	9125	4518	63200	71930	55670	30300	24120	28470	71030	68030	83420	65800	78480	64960	24910	38180	35080	97890	111300	117600	77720	61970	64350	16660	29080	17500	71440	85170	67190	47870	55650	47560	21970	18600	16030	77480	106900	67040	31370
Com_640_pos	N-Feruloylcadaverine			12.68	Phenolamides		1870000	3447000	1090000	135680	98846	136244	127198	157133	148206	103230	110762	114863	860300	1296000	1499000	206900	107100	57270	225200	348200	573300	180000	483100	68950	17500	215400	24790	93740	20700	109300	98130	120998	97222	54450	65080	70240	187844	33010	219041	120534	17190	115606	64867
Com_641_pos	N-Feruloylspermidine	C17H27N3O3	321.41	4.52	Phenolamides		24050	30300	9095	28550	16190	20420	2866	44140	6804	114100	87580	37940	14710	19790	8619	100400	93100	100700	8375	2207	4401	2913	10250	9087	116100	86620	72600	1794	2464	3108	3233	2949	3706	79770	102600	58640	4006	1863	17974	7273	2489	1657	36050
Com_642_pos	N-Feruloylagmatine	C15H21N4O3	305.35	1.06	Phenolamides		2430000	3417000	2295000	2293000	1227000	1920000	1676000	1010000	1722000	833500	1478000	1070000	1127000	1222000	1420000	279200	291100	355400	2504000	2573000	3402000	957000	676900	1083000	263800	302600	290100	3135000	2129000	2624000	1164000	1358000	957300	257600	298700	279700	2389000	3228000	2838000	2000000	2375000	2766000	1084000
Com_643_pos	Naringenin O-malonylhexoside			7.46	Flavanones		16164	18540	20890	20990	14280	19420	16100	30900	50920	14630	52070	20320	20495	19538	18245	12620	16078	13207	16257	22948	17051	8788	16724	17848	17040	17637	15661	6942	13030	10770	27930	19790	20300	13828	18307	20472	9597	11300	7702	24550	25160	31490	28990
Com_644_pos	Naringerin	C15H12O5	272.253	8.64	Flavanones	"67604-48-2"	157700	143800	254400	35280	34470	49440	48070	37690	47290	20210	50370	15220	59550	74460	57040	43090	46520	36360	47440	71240	70370	120200	90850	134000	31560	33110	24960	64370	60850	64380	166600	147700	156300	43310	41580	74700	40520	54270	49110	90430	73230	91700	51040
Com_645_pos	Glycine	C2H5NO2	75.07	0.88	Amino Acid And Derivatives	"56-40-6"	86160	69390	78430	182000	124400	196700	21450	20580	28460	8424	11840	11370	98680	62660	74560	91730	48530	72140	171700	156400	147100	50490	40650	53270	70260	32200	71520	478900	510500	457300	40280	53130	47840	21500	30150	24690	315800	341200	299000	38700	58050	52260	16980
Com_646_pos	4-Aminobutyric acid	C4H9NO2	103.12	0.864	Amino Acid And Derivatives	"56-12-2"	12910000	11120000	13560000	2538000	2227000	2406000	7481000	5194000	6021000	3248000	4114000	3244000	9412000	9063000	8602000	5899000	5116000	6008000	16960000	17860000	16570000	7658000	5592000	5031000	5535000	4575000	5016000	17650000	17100000	15840000	7370000	6710000	10180000	3398000	4068000	3502000	18110000	17700000	15920000	12110000	14200000	10690000	7763000
Com_647_pos	Uracil	C4H4N2O2	112.09	1.47	Nucleotide And Its Derivates	"66-22-8"	253200	322200	589000	129170	16260	28660	151891	137916	137458	130639	137903	30160	469000	424600	415200	271800	278000	344200	243500	266600	434500	307800	303600	302100	269900	219400	216600	173000	208000	96840	180400	207200	223200	140900	184600	193600	132600	132300	130000	233500	314900	208300	94680
Com_648_pos	isoleucine	C6H13NO2	131.17	2.11	Amino Acid And Derivatives	"73-32-5"	331100000	299200000	321500000	15240000	9535000	14720000	26640000	28340000	28620000	12640000	16300000	12790000	158400000	156400000	151300000	96100000	99410000	103400000	58030000	70170000	58300000	89820000	89620000	109800000	74680000	42830000	50920000	33700000	45200000	26850000	30290000	30560000	30590000	8793000	10350000	8937000	28280000	25720000	24520000	41900000	44750000	37940000	12160000
Com_649_pos	D-glutamine	C5H10N2O3	146.14	0.86	Amino Acid And Derivatives	"5959-95-5"	447800000	435500000	438300000	61320000	46250000	58090000	74660000	94660000	75140000	32770000	33520000	29930000	274200000	282500000	279500000	232800000	244100000	264700000	118000000	134300000	105700000	179900000	188600000	206300000	166400000	150500000	158500000	97930000	96440000	97700000	94950000	95560000	72550000	26390000	26690000	25720000	107800000	109600000	99250000	130900000	136000000	130100000	44550000
Com_650_pos	L-Citrulline	C6H13N3O3	175.19	0.89	Amino Acid And Derivatives	"372-75-8"	14630000	14210000	14680000	8156000	5779000	8510000	6599000	6371000	6158000	4506000	4816000	4763000	4031000	3892000	3813000	2476000	2495000	2194000	2701000	2463000	2472000	3135000	3201000	3358000	2594000	2114000	2704000	11690000	11250000	10320000	8902000	9567000	8572000	2811000	2933000	3050000	15760000	14790000	14050000	16850000	19340000	17130000	6845000
Com_651_pos	L-Leucine	C6H13NO2	131.17	2.32	Amino Acid And Derivatives	"61-90-5"	212200000	189200000	203200000	8784000	5486000	8251000	15260000	16010000	16000000	7216000	9089000	7175000	92760000	90870000	88400000	53610000	56310000	60550000	33060000	39700000	33430000	51070000	53070000	62580000	42560000	24800000	29250000	18880000	25560000	15610000	17510000	17190000	17190000	4920000	5962000	5043000	16210000	14810000	13850000	23560000	25640000	21270000	6855000
Com_652_pos	L-Ornithine	C5H12N2O2	132.16	0.762	Amino Acid And Derivatives	"70-26-8"	6841000	5697000	6492000	776000	634800	770200	1517000	1521000	1486000	667300	629000	534100	6825000	3785000	3697000	4764000	2969000	3058000	2036000	2359000	1734000	2846000	3086000	3243000	3456000	2344000	4739000	1356000	11070000	1127000	2391000	1725000	1397000	887300	719500	796000	1412000	1486000	1153000	2379000	2787000	2477000	737400
Com_653_pos	6-Deoxyfagomine	C6H13NO2	131.095	2.06	Alkaloids and derivatives	"197449-09-5"	3983000	3647000	3858000	232100	130900	262600	244400	291000	241800	109200	119500	102000	1741000	1636000	1643000	1154000	1208000	1347000	657100	801300	700500	1043000	1102000	1372000	976500	682900	749500	580700	678200	533800	344100	326900	306300	87290	116900	93700	484600	513100	461000	422300	460100	351100	93720
Com_654_pos	(S)-2-Phenyloxirane	C8H8O	120.058	2.01	Benzene and substituted derivatives	"20780-54-5"	1291000	1387000	1331000	902100	505700	1211000	622400	583900	637400	1130000	1083000	818300	220400	320700	436000	128200	169900	132900	1373000	1559000	1480000	258400	353700	487000	147400	198000	189900	956700	1059000	864700	432000	468000	406200	214500	102400	151400	1003000	1001000	884900	662900	596200	510000	442600
Com_655_pos	Zarzissine	C5H5N5	135.054	1.83	Organoheterocyclic compounds	"160568-14-9"	3214000	2936000	3213000	83260	48080	57160	138800	192800	108600	60180	83740	56780	1140000	1015000	1194000	653400	670100	745300	375300	432500	269500	759800	997000	1336000	479700	424100	488600	197600	437800	168900	230600	233400	217200	67120	92930	85140	147600	136400	159200	234200	243200	220700	96850
Com_656_pos	Beta 1-Tomatine	C45H75NO17	901.503	7.02	Alkaloids and derivatives	"17406-46-1"	184300000	176400000	171500000	19300000	14900000	20570000	29370000	32010000	31470000	27750000	28380000	26880000	40570000	41250000	34710000	15180000	17780000	16650000	40660000	42820000	43700000	24350000	27230000	29850000	17050000	16700000	15850000	27060000	30610000	26150000	26890000	29550000	23890000	15590000	17790000	16860000	38160000	34710000	32800000	43520000	41120000	34190000	21930000
Com_657_pos	N-Acetyl-D-galactosamine	C8H15NO6	221.09	1	Carbohydrates And Its Derivatives	"1811-31-0"	94180	105100	141800	38830	43060	80060	66040	72180	78410	50130	57870	52710	139800	76240	54980	87910	52690	37840	62340	107400	77780	93000	84870	65940	42340	38270	63030	81780	70540	45160	38800	55240	57090	41140	40110	46170	75910	66940	78140	72870	74660	66300	38860
Com_658_pos	D-Proline betaine	C7H14NO2+	144.092	1	Amino acids and derivatives	"1195-94-4"	6904000	8829000	4133000	458100	369400	496900	3478000	3416000	3463000	1754000	2409000	2251000	3961000	4626000	4927000	790600	747400	775900	1060000	1306000	1963000	2727000	2731000	1641000	791000	821400	740300	668300	604800	675700	3213000	2679000	3001000	1360000	1626000	1354000	536600	468800	500000	3463000	4207000	3233000	2218000
Com_659_pos	4-Hydroxymandelonitrile	C8H7NO2	149.048	1.44	Phenols And Its Derivatives	"13093-65-7"	1736000	1368000	2976000	361000	197900	346800	280800	405700	396000	253800	183400	131200	1503000	713900	985800	362200	293800	292400	534100	893700	522500	764000	635700	908500	585000	208400	249000	748000	1215000	498600	325300	434900	366200	85830	167600	99440	950200	728300	416100	523900	778700	404300	146300
Com_660_pos	Calystegine A3	C7H13NO3	159.09	0.73	Alkaloids and derivatives	"131580-36-4"	12340000	11350000	10770000	114800	319615	479642	1407000	1076000	1282000	5493000	6169000	5368000	2600000	2554000	2549000	3121000	2966000	3359000	162000	126600	210500	1630000	1998000	2038000	2994000	2722000	2750000	804370	1843213	720530	830900	780400	779400	1975000	2221000	1955000	692192	612360	562168	672200	481900	535400	1473000
Com_661_pos	Acetaminophen	C8H9NO2	151.163	2.76	Phenols And Its Derivatives	"103-90-2"	4096000	3229000	3905000	642700	341700	565900	2364000	762600	1701000	535300	1048000	935100	2356000	1953000	2017000	301600	363600	285000	5557000	6048000	5095000	2216000	2269000	2177000	378900	527000	472000	3647000	3740000	3328000	2202000	2185000	2169000	489800	431200	414200	3193000	3191000	2863000	2678000	2862000	2147000	1291000
Com_662_pos	Benzamidine	C7H8N2	120.152	4.09	Benzene and substituted derivatives	"618-39-3"	1057000	863500	1003000	169200	106600	182400	129300	146200	150100	60660	75910	62080	839000	840100	823700	592900	556900	640100	340400	402500	350100	477900	466500	601300	463500	292300	374500	416400	538700	379400	188700	194100	173300	68300	86680	80490	330700	348500	327900	217100	234900	208900	96150
Com_663_pos	Biliverdin	C33H34N4O6	582.646	10.32	Organoheterocyclic compounds	"114-25-0"	16310	10090	9389	15170	17870	15070	7553	6360	6317	6761	8515	4182	12610	4942	5766	10920	6150	16140	12840	10270	12350	2985	3784	5711	7950	8415	9626	4472	7348	5653	4757	6945	5963	6166	3585	2573	5757	9351	5388	9691	4130	5177	8940
Com_664_pos	Syringetin 7-O-hexoside			0.97	Flavones and Flavonols		43810	28180	39030	10480	13730	16750	12230	14850	17580	18404	15200	16386	12780	20140	24590	20360	17130	24100	36410	42860	26270	12970	39180	21860	33980	32840	26170	27990	35290	21280	18740	12120	15250	18700	31470	24690	21330	38940	30160	27710	27010	29750	44220
Com_665_pos	Syringetin 5-O-hexoside			0.97	Flavones and Flavonols		25950	37660	17140	17900	22880	13710	9158	21161	15790	5832	7930	17561	12570	18630	14600	44820	8759	35410	53170	35330	53840	10090	23910	22880	40770	37150	37360	70400	36060	31950	24270	18950	18850	41210	49110	38720	50390	49900	48850	26010	37840	16190	51020
Com_666_pos	Selgin O-hexosyl-O-hexoside			0.97	Flavonoids		195400	154800	143800	95040	56450	83980	39660	64490	55660	23040	51100	54100	45660	49020	60800	65730	40310	40510	107900	106600	45630	29160	50860	41970	31180	33970	36600	61360	66180	85290	17990	38450	23280	10980	30640	24270	185100	190500	130200	84550	68390	40010	27900
Com_667_pos	N-Sinapoyl agmatine			12.67	Phenols And Its Derivatives		93610	23540	60330	16210	17030	27500	7244	15190	21144	8473	6745	8072	37640	42990	45340	34700	27020	18220	16440	26260	28790	22200	33710	25510	7961	35560	49110	17140	30050	40540	28870	7118	16750	24720	19840	23990	20110	27020	31810	7039	8546	20581	4473
Com_668_pos	2-Methyladenosine	C11H15N5O4	281.268	1.05	Nucleotide And Its Derivates	"16526-56-0"	1552000	1638000	1511000	3052000	2224000	2990000	6866000	5868000	7244000	4412000	6085000	6314000	1128000	1114000	1229000	1590000	1719000	1952000	4236000	4567000	4686000	2763000	2978000	3084000	2199000	2255000	2324000	2977000	3048000	3019000	3494000	3542000	2666000	2465000	2729000	2405000	2640000	2375000	2380000	3244000	3235000	3332000	2266000
Com_669_pos	Hydroxycinnamate	C9H8O3	164.158	5.54	Cinnamic acids and derivatives	"614-60-8"	1125000	1008000	1138000	512100	454700	574100	274500	304400	427800	319100	329800	320500	122600	72030	105600	62540	70040	80560	551400	958800	568300	106100	231000	218700	70760	56870	93620	245300	274300	217500	188200	168700	167700	50110	61750	37860	423300	512500	438900	383700	257400	221800	114700
Com_670_pos	2'-Deoxycytidine	C9H13N3O4	227.217	1.18	Nucleotide And Its Derivates	"207121-53-7"	370900	443600	434200	61430	22720	45850	435500	363200	354800	442900	604700	479000	120500	144500	210600	150700	100300	165800	48510	64970	55190	256000	259500	265600	173300	133000	75930	61270	64480	56560	192400	170000	163900	115600	116900	127500	73200	40240	38420	243300	230600	235900	147900
Com_671_pos	2-Amino-1,3,4-tetradecanetriol	C14H31NO3	261.4	1.18	Fatty Acyls		62010	17900	13040	32650	33450	32750	38660	38530	54860	26080	56340	56760	19680	32660	14180	9012	12570	9764	51690	30090	28310	26490	11850	29253	21280	16780	15990	45630	81920	40220	40210	86200	59410	33700	54340	24970	30940	54260	48650	68670	59000	53690	43100
Com_672_pos	C-hexosyl-chrysoeriol O-hexoside	C28H32O16	624.552	1	Flavonoids		46690	35570	26020	14750	11410	14380	21011	21940	19220	14823	15390	5036	16963	7324	4650	14263	9350	10235	32300	34210	36940	9834	10060	3916	8751	7843	14332	13690	24280	16180	5049	9876	19275	10283	8763	13470	18750	23570	31980	16950	17410	25250	9586
Com_673_pos	Phellodenol H	C17H20O9	368.335	1.02	Coumarins and derivatives		83730	71370	71590	130000	89080	91800	76950	77890	150000	115700	76010	45990	69400	67280	40420	34660	25840	41290	64220	74810	43170	38680	55480	51070	39120	44680	65290	138300	159500	105100	123500	76410	182800	69050	144600	102100	206800	175700	185300	207300	153000	166300	122200
Com_674_pos	Phellodenol H O-hexoside			5.96	Coumarins and derivatives		72880	46950	78560	252300	115700	308600	57640	53590	94020	122000	153800	107700	14540	14650	15640	9161	9746	25970	294700	408800	341900	31670	33470	51810	15580	14640	12340	244200	222100	180400	46830	34380	53940	30044	37770	9999	130100	218900	170400	58170	50730	37970	18290
Com_675_pos	Punicic acid	C18H30O2	278.3	12.65	Fatty Acyls	"544-72-9"	42390000	73340000	21940000	191400	96290	157200	388800	226900	499600	168600	476800	392900	17020000	22120000	26340000	3419000	2149000	1898000	10190000	18250000	24650000	3068000	4104000	2225000	1426000	1597000	1587000	2689000	1388000	2738000	1689000	713400	851400	767500	995500	901500	662500	1283000	495400	585800	1285000	510300	508500
Com_676_pos	trans-zeatin N-glucoside	C16H23N5O6	381.2	4.62	Phytohormones		44760	50800	61370	27460	19590	19400	23480	49640	51620	78280	35690	43180	25500	26710	26170	13160	15080	10990	60610	81630	61010	21640	33380	23660	25770	22160	12720	15480	27300	21900	10490	21580	18310	10090	24130	8355	26110	16470	14150	44760	31070	22160	18240
Com_677_pos	LysoPC 16:2 (2n isomer)	C24H46NO7P	491.3	10.88	Phospholipid		3415000	4274000	3085000	162200	76420	167500	289300	383700	430200	117900	180600	234400	1994000	2029000	1593000	387100	233900	354100	1165000	1610000	1390000	960700	1143000	982600	166000	275000	279500	285800	343600	278600	422100	504700	307600	106000	211600	147400	242700	215600	201000	262800	213500	193000	82180
Com_678_pos	LysoPC 18:3 (2n isomer)	C26H48NO7P	517.2	11.33	Phospholipid		52220000	68510000	51990000	7576000	3631000	7217000	13030000	16040000	18310000	8699000	10430000	14070000	37220000	39980000	32560000	9826000	6584000	7763000	26740000	36470000	35720000	17140000	21820000	18090000	4215000	5751000	6425000	10520000	11880000	9934000	11060000	11960000	6485000	3786000	7192000	4330000	10200000	8759000	7779000	6627000	5831000	5098000	2870000
Com_679_pos	LysoPC 18:1 (2n isomer)	C26H52NO7P	521.4	12.7	Phospholipid		13750000	23760000	20780000	2098000	1093000	2090000	2670000	2526000	2894000	1043000	1131000	1639000	22770000	22780000	20250000	6140000	4446000	4010000	9342000	11800000	11870000	10180000	12220000	7805000	2154000	2571000	2716000	3524000	3880000	3518000	4009000	4508000	3531000	2071000	3546000	2485000	3124000	2657000	2343000	2565000	2816000	2084000	1459000
Com_680_pos	LysoPC 12:1	C20H36NO7P	439.1	1.5	Phospholipid		7219	20674	20759	41750	17210	36690	21810	30430	33990	24360	30200	31010	16336	16958	5815	16137	13847	13022	10290	13010	13820	13448	16961	12582	13635	15157	16386	22250	20460	17910	12160	14810	20090	12486	15791	15126	28040	9598	27080	23280	34750	13610	19836
Com_681_pos	LysoPC 18:1	C26H52NO7P	521.1	12.86	Phospholipid		701200	1012000	970900	118100	41160	65310	106200	101000	142500	38270	49580	65690	896300	926800	877300	220600	190100	183000	396200	488000	546800	417100	543800	363600	95160	114100	128800	156500	128800	140200	181900	158900	112900	91930	142500	111300	142600	89020	91890	102100	137300	79380	61990
Com_682_pos	LysoPC 18:2 (2n isomer)	C26H50NO7P	519	11.95	Phospholipid		109200000	132900000	108300000	5371000	2390000	4722000	14980000	17900000	21480000	7306000	9081000	12850000	93810000	95310000	81180000	32930000	21820000	27860000	45320000	64340000	61570000	46700000	56080000	43960000	14090000	18430000	20800000	9101000	10750000	8412000	16410000	17460000	12150000	8259000	13080000	8529000	7512000	6081000	5480000	9296000	8367000	6793000	3503000
Com_683_pos	LysoPE 18:2 (2n isomer)	C23H44NO7P	477.6	12.08	Phospholipid		1368000	1754000	1923000	321200	188400	227000	681300	596700	697500	298600	439200	597800	2015000	1955000	1565000	600900	438500	629100	3152000	3073000	2901000	1196000	1402000	1075000	433200	416500	622000	1017000	1364000	707300	1082000	844000	943100	421400	595100	431400	979900	945700	808400	636700	904000	586200	303900
Com_684_pos	8-Aminooctanoic acid	C8H17NO2	159.23	4.608	Fatty Acyls	"1002-57-9"	26170	6808	14470	15420	4771	20160	20420	16000	11000	5956	5138	10340	11990	14720	8589	7812	3574	6602	15950	21220	25950	19460	7289	13560	6063	3750	4455	14370	19260	10290	22600	18720	13520	4110	4652	7389	12070	14450	7631	15000	21620	17990	10150
Com_685_pos	D-Serine	C3H7NO3	105.09	0.851	Amino Acid And Derivatives	"312-84-5"	9244000	8747000	8550000	11500000	8568000	10610000	5961000	6322000	6495000	3616000	4141000	3458000	10110000	8176000	7506000	7488000	6149000	6610000	6325000	7116000	6626000	6876000	6930000	7529000	6109000	4458000	6723000	10010000	14670000	9062000	5597000	4969000	5214000	2637000	2870000	2967000	7434000	7078000	6587000	5370000	5570000	5292000	2922000
Com_686_pos	L-Leucyl-L-alanine Hydrate	C9H18N2O3	202.25	3	Amino Acid And Derivatives	"7298-84-2"	1520000	1143000	1592000	65610	11560	56650	95900	58200	92460	50720	80750	49470	985200	855800	565100	311300	430500	277000	823300	925000	845800	304900	207800	285800	196000	175200	203200	432000	419200	265600	255600	219700	291900	173100	206300	148800	295700	286100	240800	297800	357400	255800	283500
Com_687_pos	Higenamine	C16H17NO3	271.316	5.5	Isoquinolines and derivatives	"5843-65-2"	4334000	4648000	3909000	380000	302100	411000	1903000	1636000	2009000	2453000	3212000	2293000	3286000	4005000	3703000	4006000	3878000	4195000	1025000	1155000	928100	3546000	3189000	4577000	4422000	4441000	3956000	555300	602500	632100	3403000	4355000	3448000	3222000	4186000	3514000	772200	857800	1005000	2809000	4322000	3369000	4511000
Com_688_pos	Dicoumarol	C19H12O6	336.29	13.06	Coumarins and derivatives	"66-76-2"	55000	36190	44150	12980	14509	16710	31120	20920	31490	27880	18170	36780	45550	45610	51610	45550	41480	23810	32310	48620	57800	32430	54780	34770	28710	24430	26660	18860	10230	21520	43020	14950	26340	22580	30540	34150	10420	15240	11150	12290	18680	17878	23530
Com_689_pos	Protostemonine	C25H31NO6	417.495	0.65	Alkaloids and derivatives	"27495-40-5"	115300	120300	123100	22610	5878	37400	115500	100500	107500	57690	87310	145000	57010	45300	59980	19190	22070	31470	63500	48830	71760	73880	42200	95500	24160	12750	13270	24540	33090	22590	62480	55190	55170	17140	11780	8824	13280	15260	16250	104800	90800	84160	20640
Com_690_pos	L-Dihydroorotic acid	C5H6N2O4	158.112	0.92	Amino Acid And Derivatives	"5988-19-2"	45910000	38100000	39700000	11830000	10000000	14120000	54790000	45810000	47540000	36300000	38280000	34200000	24590000	27230000	25580000	23110000	22860000	24350000	19820000	20630000	22840000	28430000	27590000	27380000	23320000	20700000	18880000	10450000	9806000	9344000	18910000	18050000	18060000	14910000	16130000	12920000	5470000	4851000	4651000	16810000	16370000	16320000	9810000
Com_691_pos	beta-Alanine	C3H7NO2	89.093	0.8	Amino Acid And Derivatives	"107-95-9"	50550	73560	64710	322400	266800	356100	62480	51840	23900	88000	107200	130400	116900	145500	121700	282500	327100	385700	93140	85630	112000	117600	133400	133900	344400	306700	267600	266800	325800	333300	134400	140400	139200	178700	227600	160600	355200	322900	310100	163800	136000	100700	231000
Com_692_pos	pterosin A	C15H20O3	248.317	0.65	Terpenoids	"35910-16-8"	70610	59160	45790	70410	88440	79040	61210	60770	38530	58590	60260	66860	86220	53530	72450	67700	81070	92880	101100	69550	34350	44650	98430	86670	85280	66370	62090	60960	69980	58750	45070	65980	41370	43300	32950	41690	61540	48180	45830	40560	51780	40890	51160
Com_693_pos	D-Threonine	C4H9NO3	119.119	0.86	Amino Acid And Derivatives	"632-20-2"	3658000	3327000	3333000	2200000	1526000	2242000	1317000	1225000	1352000	620800	690400	492900	2549000	2396000	2349000	1823000	1813000	1987000	2702000	2819000	2928000	2157000	2128000	2153000	1790000	1219000	1562000	3713000	3989000	3530000	1576000	1563000	1510000	486600	570400	529500	2932000	2783000	2841000	1657000	1847000	1600000	628900
Com_694_pos	Nicotinamide	C6H6N2O	122.12	1.539	Vitamins	"98-92-0"	929300	663600	1039000	261500	168400	171800	324400	147200	184100	61120	80850	100600	964200	889400	942600	431500	305900	355100	2806000	1731000	1823000	654300	576600	1043000	357500	272200	391200	647300	773000	589700	444400	384900	436400	168300	247000	193600	535900	451400	353500	465800	609100	414100	161300
Com_695_pos	D-Phenylalanine	C9H11NO2	165.19	4.106	Amino Acid And Derivatives	"673-06-3"	152300000	133000000	151400000	27450000	16160000	29740000	20460000	22280000	22210000	9371000	12180000	10490000	128300000	129300000	131600000	92900000	90500000	101100000	52350000	62760000	55180000	76500000	77840000	95700000	80690000	48800000	60030000	70460000	85630000	58390000	28350000	29540000	28310000	11350000	13300000	11650000	58050000	59240000	53300000	37970000	42400000	35450000	14730000
Com_696_pos	D-2-Aminobutyric acid	C4H9NO2	103.12	0.947	Organic Acid And Its Derivatives	"2623-91-8"	1536000	1372000	1409000	1152000	762300	1158000	877600	932200	882800	567800	624200	541900	1242000	1147000	1083000	754200	635200	775000	1465000	1572000	1500000	930300	877800	933700	630800	582100	602300	1206000	1093000	1040000	833500	891300	839000	485600	550000	488700	1060000	1092000	1056000	844300	1008000	787300	537800
Com_697_pos	DL-Norvaline	C5H11NO2	117.15	1.068	Amino Acid And Derivatives	"760-78-1"	78250000	73170000	73330000	6699000	4902000	7126000	5644000	5007000	5819000	2715000	3760000	2780000	35600000	30860000	31560000	20890000	21880000	24490000	18440000	19270000	19500000	20880000	22400000	25050000	14950000	10650000	13220000	15260000	18050000	14890000	6108000	6385000	5468000	1938000	1991000	1810000	12240000	13490000	12290000	7817000	8141000	7881000	2705000
Com_698_pos	2-Amino-4-(methylthio)butyric acid	C5H11NO2S	149.211	1.46	Amino Acid And Derivatives	"59-51-8"	5202000	4755000	4635000	1054000	777900	997800	1130000	923600	830500	520300	639800	397500	2840000	2874000	3270000	1220000	1134000	902600	1310000	1601000	1519000	2098000	1963000	2912000	1014000	725500	616900	1399000	2118000	1467000	1183000	1618000	1284000	367400	264500	182700	1871000	1395000	1191000	1294000	2370000	1343000	390200
Com_699_pos	L-serine	C3H7NO3	105.093	0.846	Amino Acid And Derivatives	"56-45-1"	1781000	1646000	1401000	2546000	1823000	2606000	1280000	1513000	1429000	774700	927300	845900	2161000	1768000	1857000	1559000	1272000	1363000	1425000	1569000	1368000	1316000	1270000	1514000	1359000	1026000	1344000	2100000	3463000	2186000	1312000	1169000	1082000	579800	664200	651000	1579000	1761000	1429000	1228000	1286000	1324000	688300
Com_700_pos	L-2-Aminoadipic acid	C6H11NO4	161.069	0.93	Amino acids and derivatives	"542-32-5"	255800	263000	269800	156200	118600	157800	194800	216200	232000	239100	281900	252700	83190	85480	98760	126200	187500	163000	111700	107000	117000	65880	80570	77290	171700	133700	148000	80280	105500	90160	106800	108600	87120	127300	112500	121200	72370	76480	58110	107200	92650	95720	108100
Com_701_pos	2-alpha-Linolenoyl-glycerol	C21H36O4	352.261	11.17	Glycerolipids	"55268-58-1"	10840000	17340000	8637000	7284000	1395000	6169000	3066000	937900	2213000	1534000	3618000	2912000	13360000	16390000	10840000	2697000	2286000	1733000	23090000	28650000	40320000	7190000	14180000	5020000	1427000	2611000	1479000	25400000	22840000	23380000	10630000	4631000	4878000	2402000	3035000	2565000	22350000	28890000	20730000	5655000	6643000	4049000	2340000
Com_702_pos	Turanose	C12H21O11Na	364.078	0.95	Carbohydrates And Its Derivatives	"547-25-1"	5111000	8071000	1331000	49480000	57610000	49310000	7282000	31970000	20440000	12730000	9463000	11310000	457900	498600	549600	632400	627500	786500	3810000	5189000	4159000	298600	309600	384500	493900	416900	415100	2723000	5244000	6890000	148100	247900	215400	290500	306500	225600	19630000	22550000	26470000	274900	346400	337300	248300
Com_703_pos	Acetylcholine	C7H16NO2	146.118	1.02	Cholines	"60-31-1"	320860	320780	251100	261230	223490	221500	298100	301400	292400	308600	250500	276400	275800	296400	240300	181200	256710	256970	595300	601600	488400	276600	249980	274400	255300	161900	226930	253400	316400	273300	213500	299900	248100	195800	254700	182700	190700	213600	265400	311300	258900	279300	180300
Com_704_pos	L-Leucyl-L-phenylalanine	C15H22N2O3	278.163	6.25	Amino acids and derivatives	"56217-82-4"	1399000	924100	1827000	59050	11620	46430	105300	48510	95260	45210	96960	60170	1460000	1010000	767000	414800	526200	370700	1029000	1069000	1094000	498700	311200	453700	270500	258000	361800	648500	722100	546500	384200	290500	387900	287400	315300	250100	493900	432700	366400	527400	628000	419500	413900
Com_705_pos	Beta 2-Solanine	C39H63NO11	721.44	13.8	Alkaloids and derivatives	"61877-94-9"	437400	221300	358300	297100	237200	279700	264900	194400	308100	268400	216900	312000	1187000	312100	234400	514900	255100	320700	279000	220500	324900	272600	295400	419100	431800	328200	646500	287100	2501000	197600	246500	313700	264800	252200	304100	308000	237700	207600	270500	208000	219900	288100	207400
Com_706_pos	2-Aminoisobutyric acid	C4H9NO2	103.063	0.82	Amino acids and derivatives	"62-57-7"	19040000	16030000	16430000	16230000	10810000	15220000	13180000	11890000	12820000	9191000	9118000	8417000	13740000	12670000	12000000	9388000	8272000	8776000	18260000	19700000	18330000	11180000	11300000	11850000	8648000	8022000	8585000	15100000	14050000	13860000	11550000	10950000	10360000	6529000	7560000	6678000	13770000	14300000	12990000	12010000	12220000	11220000	7645000
Com_707_pos	N-(2-Hydroxyethyl)iminodiacetic acid	C6H11NO5	177.155	1.02	Organic Acid And Its Derivatives	"93-62-9"	53760	67890	69440	83240	57880	74950	92260	137100	89500	129900	109400	52860	63390	66090	68130	51210	51430	62100	94460	149900	130200	73710	29730	38770	48300	32270	86880	157700	111000	98610	45320	89380	55130	22430	45780	73330	73250	145500	116600	95320	139900	125900	35340
Com_708_pos	Methional	C4H8OS	104.171	0.84	Carbonyl compounds	"3268-49-3"	1062000	988100	1034000	888200	614300	859300	780500	668900	706500	491900	550300	435400	742000	750300	697500	528400	425500	529300	1116000	1028000	1067000	663600	604700	653900	539100	485200	500500	893000	868200	786100	616100	629700	569900	412400	489600	365200	740600	817600	659500	631400	714300	630200	421500
Com_709_pos	Maltotriitol	C18H34O16	506.453	1.07	Sugar Alcohols	"32860-62-1"	58300	85440	43610	79620	28290	86680	16730	85310	119600	47060	26460	36550	11520	24060	16970	18512	16700	13890	63660	39290	53570	18260	12360	7938	8365	10560	17500	23680	18950	27120	15372	20071	7599	4380	15820	11070	56110	45490	70120	12570	21300	7151	16570
Com_710_pos	Lycoperodine	C12H12N2O2	216.236	5.47	Indoles and derivatives	"42438-90-4"	197400	192900	211800	10540	30490	5859	93750	39540	59970	170400	87730	58770	138100	34820	31770	107200	47540	102100	25360	32370	50810	38500	21940	44330	211000	43910	185200	35600	207100	57240	74120	45400	39060	65710	44400	47550	23050	31180	9007	40020	26840	6734	16590
Com_711_pos	L-Valine	C5H11NO2	117.146	1.2	Amino Acid And Derivatives	"72-18-4"	5377000	5083000	5245000	498600	315600	586600	399600	393000	391500	206900	266200	209600	2240000	2100000	2239000	1402000	1329000	1730000	1165000	1280000	1205000	1445000	1480000	1573000	1009000	752600	912000	1069000	1202000	948400	450800	466800	382400	132000	155400	104700	739000	902300	730200	510900	556400	539700	149400
Com_712_pos	2,6-Diaminooimelic Acid	C7H14N2O4	190.197	0.94	Organic Acid And Its Derivatives	"583-93-7"	265300	300400	305000	165800	130600	183500	125800	149100	92340	71280	57560	79320	464500	424400	356600	860000	901300	910600	427000	422200	424300	354800	281300	300200	600900	752900	719200	191600	191400	154800	134600	121700	128100	241600	276700	210900	147300	129500	163700	149200	142000	108300	96660
Com_713_pos	iP9G	C16H23N5O5	365.384	1	Phytohormones	"83087-94-9"	707100	517300	334400	1242000	1352000	1353000	475400	908300	795300	490700	417400	489100	221100	219500	199100	131700	127300	140000	389000	417300	374900	332300	234400	180200	141200	97100	136700	312500	349700	380600	167200	185300	197400	87260	126100	86890	542500	737500	706500	228200	244200	196600	119400
Com_714_pos	Spermine	C10H26N4	202.34	0.71	Polyamine	"71-44-3"	337200	333500	343000	541200	433300	569500	441100	540100	637300	304700	558000	410300	299000	381000	407900	85440	97460	176700	337400	281300	292400	350800	461600	365600	107400	79340	80370	744100	619700	758200	210200	443400	340500	49510	40290	49120	956600	750300	675600	1200000	1522000	837000	106500
Com_715_pos	Phenylacetylglutamine	C13H16N2O4	264.277	0.94	Amino Acid And Derivatives	"28047-15-6"	12050	10700	9479	18047	6024	7852	13336	12390	9677	13450	12240	12853	8759	7166	11867	13083	10520	18940	15250	18560	19390	19100	7348	5641	5644	9312	9415	13970	28320	36580	12402	7920	5379	9065	9897	9080	15860	25160	34940	5371	7184	11907	6758
Com_716_pos	Urea	CH4N2O	60.055	0.93	Organic Acid And Its Derivatives	"57-13-6"	170500	148300	158500	41040	52150	43990	67800	43970	43580	83390	62960	44170	147600	76120	71990	170700	104500	94590	44250	66180	80350	59770	58150	63500	168500	88530	204600	55800	234100	40130	101400	57000	65180	111300	111800	207100	41050	41750	30900	66330	41190	85940	69010
Com_717_pos	Dihydroactindiolide	C11H16O2	180.243	5.51	Lactones	"17092-92-1"	250200	414800	137200	1663000	2446000	1749000	164700	1780000	453600	966400	652300	350700	83048	106540	12460	69745	39123	31106	15840	16180	7707	71591	54022	47195	78072	43942	109580	9324	20750	31540	11750	25940	11170	35342	33237	30288	17440	139600	14380	23880	23990	17040	32460
Com_718_pos	Coumalic acid	C6H4O4	140.094	0.72	Organic Acid And Its Derivatives	"500-05-0"	1239000	1185000	1126000	847000	715300	624900	916800	1169000	1318000	1282000	911800	651300	475000	486200	422900	315500	263500	266400	430400	455400	277800	308300	379300	466800	302500	395700	476800	565400	573000	687800	803400	895700	909200	754800	732600	858200	870200	803500	803000	1220000	1668000	1703000	808300
Com_719_pos	Octadecadien-6-ynoic acid	C18H28O2	276.2	12.1	Fatty Acyls		8726000	19420000	3737000	213200	90270	140300	154400	107100	261900	69580	261700	250200	3478000	7109000	6779000	1078000	661800	314100	4544000	3826000	7044000	1290000	4043000	539900	184500	1028000	220800	2828000	884500	2875000	1346000	114500	189900	411800	606300	560000	390900	1343000	402600	78890	357800	84110	129000
Com_720_pos	iP7G		365.2	1	Phytohormones		602100	932800	182500	5748000	5227000	5415000	800500	3330000	1838000	1514000	694200	904800	81590	106500	131900	94520	65360	102200	563600	571300	502500	106200	70710	118000	119900	102100	58440	334800	585000	796300	102300	99860	97110	36360	53590	36010	1684000	2020000	2296000	96120	113700	117200	69990
Com_722_pos	Feruloylputrescine	C14H20N2O3	264.1	5.04	Cinnamic acids and derivatives	"501-13-3"	3153000	3940000	1950000	1699000	3119000	1514000	14230	661600	162400	951500	588500	368700	1122000	1520000	536800	3266000	4321000	4261000	232200	219500	208600	134100	193700	459300	4068000	3032000	1895000	50530	58620	81390	64610	101400	35110	943000	852900	682600	55130	33770	34270	59440	37960	47290	230600
Com_723_pos	N'-Feruloyl putrescine	C14H20N2O3	264.1	5.1	Phenolamides		1344000	1618000	739900	765700	1274000	586600	10040	244200	46670	393100	308200	112200	513200	637500	383300	1973000	1492000	1505000	98410	119200	67570	94640	76970	205000	1678000	1356000	796400	24180	27290	26190	26870	38960	17030	354300	382500	293700	11290	13040	13120	26460	26920	14350	111900
Com_724_pos	trans-zeatin 9-O-glucoside	C16H23N5O6	381.1	4.49	Phytohormones		56140	50450	54400	50170	20840	60330	16240	19360	30440	31970	41410	30150	58510	61440	47470	28590	17520	33110	207300	267900	225500	34020	38150	46970	28020	27020	22420	94530	73050	80500	26360	27960	40170	23380	21630	24240	77270	76800	56500	33000	43710	22750	26820
Com_725_pos	Uridine	C9H12N2O6	244.2	1.86	Nucleotide And Its Derivates	"58-96-8"	2084000	1429000	2693000	206400	65050	147300	810600	134300	414000	181300	378300	227500	3189000	3363000	2149000	2113000	1814000	2062000	2591000	3210000	4080000	1533000	1860000	2690000	3256000	1706000	2208000	2222000	2917000	1380000	1383000	1250000	1949000	1016000	2029000	1667000	1075000	1342000	1120000	2066000	1607000	1490000	1361000
Com_726_pos	Cytidine	C9H13N3O5	243.22	1.029	Nucleotide And Its Derivates	"65-46-3"	402500	505600	1082000	285300	94130	379100	897100	192300	318700	68600	181200	104900	3752000	1924000	4849000	1260000	912200	720000	2196000	2824000	3208000	1322000	1482000	1367000	815200	1108000	1020000	2090000	1158000	2231000	1360000	2099000	2400000	798900	1476000	1569000	1557000	1331000	1301000	2196000	2360000	2018000	1079000
Com_727_pos	Tigogenin	C27H44O3	416.645	7.47	Terpenoids	"77-60-1"	13000000	12250000	13630000	5820000	4007000	5744000	9877000	8905000	9387000	8405000	8789000	8253000	9034000	8952000	8900000	5533000	5838000	6444000	7654000	8706000	8093000	7481000	8012000	8510000	5670000	5531000	5616000	7223000	7223000	6254000	7881000	7645000	7086000	4355000	5377000	4737000	8247000	7679000	7396000	9733000	9707000	8809000	6125000
Com_728_pos	Alanine	C3H7NO2	89.094	0.86	Amino Acid And Derivatives	"338-69-2"	1429000	1257000	1369000	3116000	1942000	2887000	1055000	976700	1013000	505700	440700	532800	1710000	1559000	1516000	782700	771100	837200	1654000	1790000	1812000	1015000	1047000	1116000	675900	566000	677800	2837000	2812000	2594000	942700	882600	934300	398000	423100	431900	2129000	2349000	2014000	825700	862100	811800	594400
Com_729_pos	Tropine	C8H15NO	141.21	1.05	Alkaloids and derivatives	"120-29-6"	938800	918100	771100	52720	54100	81280	162400	167200	194400	207000	383300	281200	674300	751900	702800	570000	606800	609800	441600	440000	492700	448900	535600	498900	555300	583900	572900	158600	146500	149000	482000	575100	477600	550200	626800	509900	149200	143400	176400	475500	415600	462500	548400
Com_730_pos	Glycyl-L-valine	C7H14N2O3	174.2	2.077	Amino Acid And Derivatives	"1963-21-9"	133100	88980	98930	25070	23953	34000	21010	24070	16970	14040	13720	19820	97370	48650	63080	41400	13320	36760	94170	109800	89160	31740	31130	30650	151000	23070	62660	58370	120600	43770	37950	20590	29520	18010	32960	25990	51140	47790	30670	29980	29870	28840	33050
Com_731_pos	Nepsilon-Acetyl-L-lysine	C8H16N2O3	188.22	1.304	Amino Acid And Derivatives	"692-04-6"	140100	148500	139400	232800	107200	178300	132000	133200	135800	50410	54520	55170	142300	201000	216100	139900	111400	123000	405500	624000	422000	141100	117000	148000	144100	106400	124600	385400	381800	291500	139100	139200	140200	65520	46580	73230	355100	374200	336900	154600	189900	156700	55490
Com_732_pos	N-Methylsarcosine	C4H9NO2	103.12	0.9	Amino Acid And Derivatives	"1118-68-9"	8338000	6971000	7871000	7325000	4982000	7191000	5307000	5541000	5505000	4080000	4341000	3923000	5969000	5691000	5503000	4035000	3861000	4116000	8366000	8860000	8356000	4770000	5059000	4943000	4046000	3673000	3967000	6831000	6551000	6053000	5536000	4881000	4777000	3133000	3747000	3101000	6095000	6202000	5300000	4830000	5712000	5106000	3527000
Com_733_pos	3-Amino-2-methylpropanoic acid	C4H9NO2	103.12	0.931	Amino Acid And Derivatives	"144-90-1"	2309000	2057000	2227000	587400	433500	494900	1176000	849300	931800	523700	664900	513400	1500000	1414000	1353000	870600	838500	925800	2575000	2560000	2553000	1180000	883200	971300	910300	721300	800500	2649000	2440000	2254000	1104000	983800	1560000	431300	579300	519700	2691000	2617000	2284000	1816000	1975000	1554000	1163000
Com_734_pos	H-Gly-Pro-OH	C7H12N2O3	172.18	1.035	Amino Acid And Derivatives	"704-15-4"	164300	126000	149700	69710	57200	96100	59720	53140	68270	43010	28540	31790	177900	123100	165200	86660	69560	127300	272000	334400	279100	78730	83420	67850	591500	79220	153600	218400	385300	157000	100500	98240	117800	58510	70410	58950	183300	216300	147700	108800	110000	83650	35180
Com_735_pos	L-Homocitrulline	C7H15N3O3	189.21	0.972	Amino Acid And Derivatives	"1190-49-4"	34758	23670	30704	24060	22300	22190	16100	16576	22004	25680	14320	21960	23640	26342	27065	22720	9580	20420	27104	26079	26400	16964	23568	20750	23760	27450	34530	23780	47330	35910	20460	21862	28440	24490	43810	33400	46060	59420	44960	18510	16670	34830	39280
Com_736_pos	L-Glutamic acid	C5H9NO4	147.13	0.886	Amino Acid And Derivatives	"56-86-0"	188700000	176200000	165400000	296600000	215200000	295600000	139800000	155100000	151600000	114500000	120100000	113700000	109100000	116200000	118100000	83640000	83120000	97680000	199700000	198400000	192100000	105600000	131400000	136900000	80670000	74740000	73270000	182400000	173100000	174300000	117500000	128700000	89760000	71010000	68940000	70260000	169500000	168300000	169000000	100600000	85850000	96370000	76610000
Com_737_pos	H-Abu-OH	C4H9NO2	103.12	0.947	Amino Acid And Derivatives	"1492-24-6"	2665000	2319000	2570000	2085000	1393000	1971000	1667000	1537000	1629000	1214000	1281000	1094000	1962000	1847000	1783000	1320000	1251000	1276000	2729000	2653000	2504000	1582000	1430000	1596000	1272000	1107000	1145000	2168000	2118000	1925000	1500000	1374000	1470000	882300	1020000	867900	1927000	1813000	1678000	1611000	1827000	1492000	1024000
Com_739_pos	Anise oil	C14H18O3	234.291	15.13	Benzene and substituted derivatives	"8007-70-3"	6390	13680	25990	29630	19490	18200	16060	25940	17000	17140	14280	23390	28980	24270	21250	18880	27080	20230	35750	37960	17950	24510	23360	23550	24180	12040	13850	48280	42130	37110	20860	15740	8313	16140	19230	17740	31560	40100	41560	22710	12780	17740	27770
Com_740_pos	Nortanshinone	C17H12O4	280.274	15.76	Quinones	"97399-70-7"	10440	19850	10470	25630	14240	19990	14880	10990	14020	19480	12180	13890	18370	13200	22040	12930	15690	16960	14040	15390	22930	13080	12980	16020	10950	15680	12800	10250	9031	19910	15590	12710	19990	19080	19520	13650	11670	16080	11160	13330	15920	13940	10700
Com_741_pos	Gallacetophenone	C8H8O4	168.042	4.69	Ketones	"528-21-2"	14340	15340	11870	21550	21770	22990	25100	26620	19400	22550	21790	18430	5992	8909	10820	6567	4617	10730	38680	51430	34510	11260	14400	11420	13660	9625	5648	9024	17360	11400	5881	10710	5531	7494	5701	4036	16010	14110	7812	3624	5239	2867	2589
Com_742_pos	Isofraxetin	C10H8O5	208.037	10.84	Coumarins and derivatives	"50656-75-2"	60600	75430	51150	57920	54460	95180	61420	46870	71100	59410	82430	110700	74110	81840	76130	71950	64850	67710	73310	93500	52800	84560	53160	82150	66140	75750	51130	73880	75400	70750	70800	69050	66840	58890	63470	57210	60680	92760	77210	83490	97070	87260	65910
Com_743_pos	Gamma-Solanine	C33H53NO6	559.387	15.65	Alkaloids and derivatives	"511-37-5"	5185000	5346000	5278000	5655000	6028000	6401000	6382000	5864000	5662000	5797000	5247000	4878000	5383000	5818000	5581000	5725000	6231000	5757000	5846000	5928000	4822000	5729000	5345000	5116000	5910000	6068000	5451000	6035000	5602000	5061000	5776000	5119000	5622000	5618000	5713000	6517000	5632000	4747000	5440000	5625000	4804000	4951000	4941000
Com_744_pos	N6-(2-Hydroxyethyl)adenosine	C12H17N5O5	311.123	4.7	Nucleotide And Its Derivates	"4338-48-1"	471200	651000	584800	498600	294700	564600	803300	568900	638700	633500	602200	635200	332600	293900	341000	385300	330000	392800	717000	838400	655200	577100	567300	515900	411300	586800	430400	433100	508000	339300	488500	372200	394200	339300	470700	255600	311400	371300	377400	304200	314300	302800	238000
Com_745_pos	Demissidine	C27H45NO	399.35	11.06	Alkaloids and derivatives	"474-08-8"	3657000	2565000	2235000	1780000	7998000	2485000	1577000	3242000	2390000	3186000	6086000	1942000	2706000	5179000	4848000	1914000	2647000	3004000	2746000	2994000	1405000	3225000	3092000	6577000	3644000	2125000	2175000	2807000	1967000	2554000	2511000	3203000	9034000	3423000	3238000	3174000	2617000	3654000	2448000	3267000	2913000	2442000	2718000
Com_746_pos	N-Methyl-Trans-4-Hydroxy-L-Proline	C6H11NO3	145.074	0.91	Amino acids and derivatives	"4252-82-8"	1303000	1169000	1318000	815300	629800	769600	1176000	1122000	1130000	999000	1103000	1022000	1027000	938700	999300	691300	767500	885900	974500	884200	959100	829000	893600	1015000	674600	627900	588000	708900	655000	584000	793500	695600	658700	437000	505700	463100	496700	483100	473000	716000	700700	684300	498500
Com_747_pos	2,6-Dimethoxybenzoquinone	C8H8O4	168.042	4.69	Quinones	"530-55-2"	12760	13380	6144	21880	10590	22530	34230	41160	25180	22760	26370	26180	13703	2933	10930	8272	4677	9623	54370	64680	48670	9977	10130	16910	11490	9172	5354	12490	14400	12620	8042	5771	6937	10050	2578	8563	9429	8349	12100	4193	5994	4248	11539
Com_748_pos	Hypoxanthine-9-beta-D-Arabinofuranoside	C10H12N4O5	268.226	2.58	Nucleotide And Its Derivates	"7013-16-3"	6584000	4447000	11880000	1241000	611300	1154000	6332000	1300000	2928000	1114000	1716000	927400	10760000	14120000	16060000	256500	268300	262000	30500000	32330000	28690000	11990000	13520000	13230000	304300	281600	267200	27280000	26720000	23820000	15040000	14500000	14630000	192900	266200	220100	24450000	23320000	21110000	18380000	18680000	15750000	3193000
Com_749_pos	Indole-3-acetamide	C10H10N2O	174.199	0.82	Indoles and derivatives	"879-37-8"	1231000	1235000	1236000	74960	66490	64990	78570	91180	60680	32060	33310	34920	589100	631500	655100	198300	229600	187200	700200	1001000	673200	210500	209700	342700	136800	70050	102000	266800	268000	304000	66790	49040	55510	8334	22960	34410	388800	398000	489900	90910	79410	87380	16520
Com_750_pos	Salicylamide	C7H7NO2	137.048	0.92	Phenolamine	"65-45-2"	69600	90180	99720	368300	353200	427000	267700	332900	373000	143500	180600	159400	83200	72920	89970	90610	90180	81920	256100	222600	212800	69870	81910	82500	85010	87230	72540	362600	345100	412000	181600	175300	160400	62850	75300	58110	398300	452100	344700	229600	242800	213700	86090
Com_751_pos	6-Deoxy-D-glucose	C6H12O5	164.156	0.95	Carbohydrates And Its Derivatives	"7658-08-4"	43120	41140	59590	59450	43814	97410	46025	47960	23800	59120	51673	34120	56630	52421	85320	131400	48303	23850	51586	11070	17440	47792	54799	55640	54570	24350	54160	55210	27560	52299	41670	35250	96970	35825	54610	15810	67850	46560	36310	44770	46150	50510	37610
Com_752_pos	(-)-Carvone	C10H14O	150.218	9.22	Terpenoids	"6485-40-1"	136300	200000	115600	5877	6614	11960	21910	5890	15780	6779	17110	6652	82530	101500	99370	48990	38890	27280	77590	124200	143500	49180	48970	40530	38670	29490	24320	19230	21630	34650	39070	25970	39980	20400	27320	15920	20950	13760	11640	41270	53270	26460	12890
Com_753_pos	Luteolin-4'-O-glucoside	C21H20O11	448.101	6.8	Flavonoids	"6920-38-3"	57370	66470	92080	357000	746500	571500	144300	90140	66910	101700	118000	79440	29250	29020	26810	32880	28200	24450	134600	128400	109800	26060	56130	52690	38120	24380	40700	230000	203300	315800	89440	88410	94480	51330	72490	51600	374400	260300	283700	111100	83740	81430	85040
Com_754_pos	2-Methylcinnamic acid	C10H10O2	162.185	5.53	Cinnamic acids and derivatives	"2373-76-4"	52210	60120	25280	275100	316100	300800	21060	223000	88740	102300	102700	80120	14500	34204	17520	54043	18551	20410	14031	14912	20393	18903	24100	18770	58627	20283	75512	9677	136752	22660	11390	30930	44970	25185	13270	25350	14264	11611	32130	10260	27898	22285	20152
Com_755_pos	trans-beta-Ionone	C13H20O	192.297	9.97	Terpenoids	"79-77-6"	329400	379200	406600	364800	306900	313300	307500	339100	317600	332200	356900	306400	344200	338600	364400	344400	393200	318100	347100	330100	349200	345100	309300	323200	366600	317400	304100	323800	319900	319000	295700	363100	308800	299400	329200	333800	350800	338000	322600	339100	307300	307300	291000
Com_756_pos	Geranylacetone	C13H22O	194.313	5.34	Terpenoids	"3796-70-1"	212230	142300	126600	697600	473300	670300	82970	66470	47480	190300	146200	70620	185253	170080	183192	151194	160876	161935	480300	615500	508800	91470	135700	151327	136075	121674	130593	747200	717100	768800	137700	138300	135200	83840	77620	108218	664200	688100	600300	80980	101300	160700	49330
Com_757_pos	Vanillin	C8H8O3	152.147	1.02	Phenols And Its Derivatives	"121-33-5"	22750	18500	37910	23400	12600	18760	21243	21524	19709	18711	16883	17050	23703	14310	16020	13850	13840	15396	16540	35490	20840	19060	20870	18214	10430	16758	19960	27170	33250	31060	19120	19640	14820	15505	30390	11600	29260	22360	16430	35360	36860	16150	20010
Com_758_pos	alpha-Ionone	C13H20O	192.297	1.86	Terpenoids	"127-41-3"	1262000	1113000	1200000	27670	19440	32810	50530	71930	60440	30990	32480	27710	477100	434600	515900	287300	301700	329200	118800	153100	122100	355500	444100	471300	197500	189400	198900	74840	184100	69450	107200	102600	77110	38010	26740	37430	55410	57390	59570	108300	105700	95550	38250
Com_759_pos	Solanidine	C27H43NO	397.636	0.96	Steroids and steroid derivatives	"80-78-4"	1243000	1590000	1302000	389200	305900	380700	1048000	751200	748100	692500	1111000	762600	833800	912300	1116000	540300	524900	512200	2124000	914900	922300	720400	1356000	792000	555100	537400	702600	886400	714300	936600	1735000	730100	1386000	508100	694400	543100	444900	532100	456900	1118000	807900	1292000	551900
Com_760_pos	Sorbic acid	C6H8O2	112.127	6.72	Fatty Acyls	"110-44-1"	119100	41400	60680	62260	107700	56880	86490	117200	78880	25290	26850	80540	56670	58250	110400	71870	63930	50820	104200	110300	94460	73210	120600	117700	104800	71550	82040	95440	92930	87560	101800	58300	62470	106000	57790	38280	51780	53120	51200	62420	63600	27050	73890
Com_761_pos	Kukoamine A	C28H42N4O6	530.31	0.68	Phenolamine	"75288-96-9"	267300	241600	219300	94850	52570	77750	245400	303100	150500	242900	296200	223200	191000	224700	184700	59750	96410	113800	136400	112800	112300	173100	157700	189100	106400	91690	71050	86990	125500	123800	151700	185900	142200	45210	123000	71400	126200	88320	84880	275000	280600	198500	115300
Com_762_pos	Phenylethanolamine	C8H11NO	137.084	2	Amines	"7568-93-6"	4604000	4417000	4298000	3410000	2026000	4942000	2543000	2513000	2572000	4552000	4731000	3706000	869000	1297000	1615000	319800	454300	546200	5847000	6945000	6319000	1178000	1494000	1874000	484200	689900	778600	4312000	4324000	4025000	1835000	2032000	1709000	910000	471700	604400	4412000	4554000	3608000	2966000	2735000	2074000	2021000
Com_763_pos	1-Methylpiperidine-2-carboxylic acid	C7H13NO2	143.095	0.99	Amino acids and derivatives	"7730-87-2"	5453000	6569000	2998000	329600	257000	352900	2508000	2182000	2459000	1460000	1629000	1572000	2768000	3166000	3543000	495900	529100	567800	828700	981100	1324000	2071000	2024000	1241000	438700	570800	526700	503600	539800	503500	2210000	2012000	2010000	834900	1090000	862600	367100	308000	372700	2587000	2856000	2315000	1637000
Com_764_pos	N-Feruloyl-3-methoxytyramine	C19H21NO5	343.142	5.72	Phenolamine	"78510-19-7"	25050	19910	25690	23100	21680	22700	47300	23430	32970	25340	24292	16130	29670	32040	28830	13930	22780	15830	29480	32340	24830	13810	23550	26290	41770	16250	17100	25030	29730	24600	23330	28040	29260	18550	21310	25720	22140	20170	21150	22120	16770	28220	27850
Com_765_pos	Sinapoyl quinic acid			13.55	Organic Acid And Its Derivatives		13960	8704	8523	7806	12000	13500	14060	7611	6763	6688	13940	13330	17500	13250	15200	17860	12400	11960	21060	16130	12040	11820	8666	19380	18380	13270	12420	9893	10150	7049	12060	11650	11780	6486	12680	8389	11500	6377	6364	9278	8240	8745	9290
Com_766_pos	N-p-Coumaroylputrescine	C13H18N2O2	234.29	4.91	Cinnamic acids and derivatives		4542000	5163000	3049000	2619000	2827000	1762000	174900	627500	413600	289100	283500	181100	842850	65980	39710	363485	387203	385822	1014000	1470000	1258000	15320	71030	125200	339741	12210	7697	721200	716900	788100	24490	106000	280765	101876	4028	111298	1343000	586800	939600	133600	80520	170400	11610
Com_767_pos	N-Feruloylputrescine	C14H20N2O3	264.32	5.22	Cinnamic acids and derivatives		2492000	3435000	1757000	1260000	3167000	1432000	21730	646100	176700	822600	732100	280800	1116000	1609000	662500	3393000	3106000	3775000	239500	262300	241900	109700	240700	453300	4102000	2488000	2722000	84520	66380	68860	61730	122600	22400	822400	1033000	561900	49120	22290	36070	43380	33140	40710	245500
Com_768_pos	N-Caffeoylputrescine	C13H18N2O3	250.29	4.57	Cinnamic acids and derivatives		8518000	9431000	4040000	7447000	27670000	8879000	267400	12340000	1697000	16010000	9149000	3606000	409400	395300	336100	390600	424900	437800	82160	136000	88580	289600	299500	662500	416500	405900	292000	66020	58430	47030	280400	346700	195900	46670	87160	31620	107700	28970	77950	314800	250900	285400	122400
Com_769_pos	MAG (18:3)	C21H36O4	352.2	12.12	Glycerolipids		56330000	66270000	52550000	17910000	8164000	19020000	26850000	16720000	28380000	13430000	24400000	24160000	29640000	32820000	22150000	8782000	6535000	6209000	32680000	43470000	58600000	18750000	32690000	19680000	4408000	6878000	5065000	23470000	18640000	21600000	21350000	12220000	8544000	7520000	10060000	8054000	13210000	20510000	15120000	7689000	15210000	6199000	5130000
Com_770_pos	LysoPC 20:4	C28H50NO7P	543.4	12.69	Phospholipid		2493000	4890000	3763000	209200	131400	188300	277600	272800	317000	143300	173000	200000	3929000	4346000	4118000	883000	695000	601500	1512000	2073000	2220000	1627000	2110000	1271000	268500	361100	356000	484000	536000	480700	647600	588400	478500	309800	431400	349100	380300	372500	332300	317000	390500	279300	184000
Com_771_pos	LysoPC 15:0	C23H48NO7P	481.3	11.94	Phospholipid		21990	19280	40090	12230	8399	15930	22650	20160	21120	19080	22140	16880	30660	26910	10520	28610	12500	24360	38920	38880	30720	21810	16480	17250	15250	15720	22120	20920	36910	26280	28950	29300	32990	26960	27190	23470	27680	30360	26420	17640	24340	25750	15910
Com_772_pos	MAG (18:1)	C21H40O4	356.2	15.2	Glycerolipids		18940	28740	13760	1803	11276	4744	9084	7368	6722	8377	9133	7575	29240	11520	6306	26560	6066	5225	17160	22510	28190	20890	6683	7251	3428	12030	14230	9092	2715	6476	2007	3190	1917	4715	7084	2935	7788	7140	6196	6042	6740	6949	6303
Com_774_pos	Octadeca-11E,13E,15Z-trienoic acid	C18H30O2	278.2	13.5	Fatty Acyls	"25575-00-2"	1313000	2848000	1696000	1647000	1120000	1320000	1433000	1582000	3579000	1390000	2516000	1720000	1996000	3045000	3795000	1742000	3319000	3413000	2601000	3923000	3079000	4095000	1722000	3865000	3874000	2638000	1869000	3482000	2627000	3619000	3757000	2286000	2858000	2975000	2157000	4387000	2294000	2561000	3902000	4465000	4059000	3884000	3090000
Com_775_pos	LysoPC 10:0	C18H38NO7P	411.3	6.25	Phospholipid		564500	368700	223700	46850	4252	43560	200600	147700	82290	91920	255600	69400	297000	344700	483600	160400	213300	326200	144200	275200	165400	180000	317800	160300	243300	111200	313400	114300	118600	65920	245900	261100	144200	80750	169500	79730	80630	60550	20170	197100	144800	160900	19800
Com_776_pos	Cocamidopropyl betaine	C19H38N2O3	342.1	9.91	Alkaloids and derivatives	"86438-79-1"	389100	257100	305300	155400	194200	143500	194700	190100	174200	201700	200400	198000	526300	272000	254500	358200	416900	363600	267500	241100	224200	266200	179200	189500	831000	323000	595300	283600	404100	218600	356900	275400	382800	370200	326700	706700	172700	195000	186600	400600	309200	255400	198200
Com_777_pos	Gramine	C11H14N2	174.24	9.938	Alkaloids and derivatives	"87-52-5"	134000	138400	120100	124800	120700	133200	108300	122300	134700	102800	114900	120300	107300	125400	132600	104700	143300	123300	131400	110900	135300	143800	127800	141900	109300	121800	142300	113800	117600	143900	128100	103800	99130	119500	109300	124500	108500	139000	128700	127100	120500	121900	128100
Com_778_pos	Phloretin	C15H14O5	274.27	8.598	Chalcones and dihydrochalcones	"60-82-2"	471100	634700	432100	16000	8552	16010	152000	33790	74610	41980	61790	59220	391500	425100	450600	107800	76240	92400	808800	998500	1312000	202400	162200	133500	80650	72870	72070	435400	377900	370600	270300	244600	272700	79290	113600	67510	288700	392100	234800	303200	398000	301800	130500
Com_779_pos	Isopentenyl adenosine	C15H21N5O4	335.358	6.814	Phytohormones	"7724-76-7"	19700	33480	26080	4297	12925	16745	5706	15410	19790	6319	6754	4530	19640	20980	21860	9353	12045	11373	13410	20961	7905	19550	10800	21020	21360	15090	10800	15670	8329	11090	32560	31660	39170	16440	7763	10430	8908	21470	7411	40120	63030	50520	20930
Com_780_pos	S-(5'-Adenosyl)-L-methionine	C15H22N6O5S	398.137	0.83	Amino Acid And Derivatives		2220000	2258000	2395000	492700	508500	532100	301300	294700	334900	329000	205300	219000	1030000	1240000	1127000	324500	407400	381000	1499000	1545000	1536000	583700	743400	651600	283600	255400	267200	1117000	1029000	1080000	404700	342000	364200	124200	191200	157000	1275000	1212000	1273000	510400	458400	405000	291400
Com_781_pos	Petunidin 3-O-glucoside	C22H23O12	479	0.98	Anthocyanins	"71991-88-3"	555300	950400	212400	883100	945600	695000	465400	1070000	1439000	661400	807500	854400	150200	193200	167000	181600	128600	131600	432100	555300	414300	88150	61910	119000	105600	127500	116200	479900	803800	886100	48620	71090	55140	62980	76970	85360	1427000	1178000	1469000	107400	106200	117100	95250
Com_782_pos	Icariside B2	C19H30O8	386.194	6.05	Organooxygen compounds	"108906-51-0"	46840	50010	39370	73710	106300	166700	45880	35510	62630	22780	40140	24270	30880	19800	32760	47910	13740	26290	99130	115000	84620	30490	68090	43380	18860	23220	13760	140300	139200	124400	51980	71610	46410	24950	23440	11760	231200	251100	139600	64510	90070	54080	51280
Com_783_pos	Angelol K	C20H24O7	376.406	11.12	Coumarins and derivatives	"169736-93-0"	949000	628200	496200	415800	1898000	670500	382800	758700	587100	716500	1384000	460700	636200	1249000	1155000	455600	634600	713500	685000	865500	431200	771800	686700	1457000	802100	522300	511200	694500	500200	663400	559300	787800	2287000	715800	626000	677600	610000	933800	572900	705600	692900	568700	665300
Com_784_pos	Angelol A	C20H24O7	376.406	11.11	Coumarins and derivatives	"19625-17-3"	207800	157400	149700	91610	459800	170700	99530	166400	151100	177100	362300	127000	195000	332500	308800	90800	174000	198700	188900	194900	121700	185900	210500	370900	214700	113100	145000	187300	129300	162600	128200	171200	600700	189800	166200	191500	144100	274100	138800	207900	163000	156700	171200
Com_785_pos	Paeonol	C9H10O3	166.177	4.08	Ketones	"552-41-0"	829200	726400	757900	151100	80770	155200	109300	115200	112300	51020	56200	56910	711500	646200	701700	460800	500900	539700	280500	339800	283700	385800	405900	504800	441100	249700	311600	385100	449500	297200	176500	168300	156000	72460	69090	53480	316900	297600	294800	198900	206500	175100	68960
Com_786_pos	trans-3-Hydroxy-L-proline	C5H9NO3	131.13	2.14	Amino Acid And Derivatives	"4298-08-2"	13310000	12010000	13050000	526800	339400	529200	1001000	1009000	1053000	469400	580200	465400	5732000	5609000	5615000	3387000	3523000	3964000	2051000	2557000	2108000	3053000	3269000	4035000	2642000	1602000	1892000	1222000	1580000	976800	1096000	1094000	1058000	310700	357900	312600	1024000	960500	870500	1471000	1573000	1331000	418300
Com_787_pos	Val-Ser	C8H16N2O4	204.224	1.01	Amino Acid And Derivatives	"13588-94-8"	143300	150100	145900	89460	66500	98640	39490	63390	63740	37030	49070	48340	84870	57260	101200	49270	39630	94250	172500	153600	164000	58060	31750	58240	81340	57370	55850	93840	117600	76890	34130	31110	63090	33110	53340	35330	80450	79100	71280	37950	82190	34520	19440
Com_788_pos	alpha-Keto-gamma-(methylthio)butyric acid	C5H8O3S	148.18	13.57	Organic Acid And Its Derivatives	"583-92-6"	550600	554700	365900	540600	589700	478700	528800	443200	646600	642400	801800	522100	921100	791000	1059000	1077000	956900	869700	851800	841300	563800	971700	1229000	490700	715900	888300	612100	506400	738900	827900	651200	771400	918500	494700	1001000	925300	1236000	701800	834500	681700	653600	887300	654600
Com_789_pos	4-Acetamidobutyric Acid	C6H11NO3	145.156	1.03	Amino Acid And Derivatives	"3025-96-5"	168100	117100	229200	169500	111900	208700	192700	173800	159300	152000	160300	149700	194900	250600	217300	151000	136900	141000	319400	437900	396900	139600	158000	179500	156500	142800	110400	237800	210400	192300	173600	182100	212000	147400	149400	125100	166500	178200	233300	215700	204700	202100	76640
Com_790_pos	Gentiobiose	C12H22O11	342.297	1	Carbohydrates And Its Derivatives	"554-91-6"	59410	85210	78700	159000	162000	147500	51560	38360	44750	42000	56530	41550	79680	80450	109500	78870	61350	78640	198700	120400	138600	79730	58100	49000	77750	70370	70910	166000	156200	143700	61950	84090	53960	42040	88110	84330	149500	157800	153300	81870	62200	56690	76640
Com_791_pos	alpha-Nicotinamide adenine dinucleotide	C21H27N7O14P2	663.425	1.04	Nucleotide And Its Derivates	"7298-93-3"	935500	786800	717200	283100	261800	408300	109700	171300	236100	64870	77140	63200	12950	7529	126775	98020	96600	118108	76180	280600	163700	2158	18330	37570	86803	2703	9148	31990	24820	34430	34045	7503	6426	21958	28040	21611	122900	57690	89410	4837	8518	9174	25865
Com_792_pos	Orotic acid	C5H4N2O4	156.096	1.44	Vitamins	"65-86-1"	127200	129700	151500	852700	790400	950400	1130000	995800	948200	333500	836200	832700	55220	68650	94690	263744	247816	288968	301800	226600	275100	103400	121500	163900	35380	54900	224020	541200	549500	581300	482500	442700	631100	55440	111300	63140	553200	415300	519800	579600	545900	536600	347700
Com_793_pos	Arecoline	C8H13NO2	155.197	1.24	Alkaloids and derivatives	"63-75-2"	13379	21120	10854	3012	14166	14767	9637	20880	19590	28900	10670	14880	5236	5054	15780	5788	13000	13828	9065	9885	5789	5669	9393	13370	13440	7648	7627	14107	7722	8865	7238	11058	10910	9994	8857	11335	11218	5080	4668	12180	13980	13930	32890
Com_794_pos	Glucosamine	C6H13NO5	179.173	0.793	Carbohydrates And Its Derivatives	"3416-24-8"	599200	522100	515000	328700	311700	387800	518700	396300	278800	271000	440800	442000	504800	477500	586600	433700	466000	597500	468300	568500	571600	562100	459700	448900	345600	282000	272000	352600	303500	206400	249200	308000	306400	163400	211100	139300	133400	186600	186800	189600	154300	149000	137500
Com_795_pos	Stachydrine	C7H13NO2	143.18	1.008	Amino Acid And Derivatives	"471-87-4"	14240	20260	11950	9928	7806	13440	11389	6944	10770	16980	13080	7063	10050	14770	9775	13950	8560	7737	14340	11020	12820	6585	8174	5994	14540	7865	10970	17870	9940	9908	5030	9248	11530	8119	8332	5608	10370	18260	7338	9785	11700	9343	4942
Com_796_pos	Vanillactic acid	C10H12O5	212.199	9.2	Phenylpropanoids and polyketides	"2475-56-1"	213300	389600	151400	72545	57800	7107	20050	111370	10220	107004	96894	95710	156700	190300	200400	64420	45810	45710	180900	251700	353400	118000	69740	74610	52030	47010	72680	56510	53380	52040	79820	69850	142300	46990	45030	30470	52520	38880	21450	90280	117300	105200	51360
Com_797_pos	Tricin 5-O-hexosyl-O-hexoside	C29H34O17	654.57	6.61	Flavonoids		705000	691500	595100	699400	473300	807700	1429000	1781000	1821000	1865000	1798000	1607000	211855	239394	10500	144999	124083	165111	194161	221299	9787	13880	16150	23030	172263	128862	163325	88460	64650	89890	260000	270500	190500	6766	4030	5229	202600	202000	214600	617400	608100	654200	272200
Com_798_pos	Tyramine	C8H11NO	137.179	2	Benzene and substituted derivatives	"51-67-2"	699700	688700	672700	512700	324100	756700	410300	416200	364100	718600	696400	552700	138100	196300	263900	40590	63090	91320	964000	1077000	970800	173400	224500	282500	82530	118700	112400	674100	702700	616300	305700	314800	255300	145900	72330	109300	718500	667800	592700	423700	418100	330400	332700
Com_799_pos	LysoPC 16:0 (2n isomer)	C24H50NO7P	495.33	12.55	Phospholipid		2951000	3529000	6642000	1850000	1027000	1590000	1706000	1217000	1665000	1218000	1275000	1344000	2426000	2607000	1816000	1859000	1262000	1625000	5869000	5840000	6033000	1709000	1357000	2114000	1349000	1048000	1525000	4169000	4958000	3696000	1734000	2037000	1837000	1431000	1753000	1970000	4150000	3896000	4229000	1200000	2260000	1740000	1697000
Com_800_pos	LysoPC 14:0 (2n isomer)	C22H46NO7P	467.3	11.36	Phospholipid		68170	64010	104400	15330	4840	15190	29190	26720	30080	12930	12780	10140	47430	59070	28820	25710	12420	26800	77570	125900	112500	25280	28690	46360	24910	22970	36750	51120	62120	42670	43780	45930	32000	25070	23150	22410	50280	41930	37840	28730	32600	32380	30070
Com_801_pos	LysoPC 18:0	C26H54NO7P	523.36	13.8	Phospholipid		78250	48880	203800	83040	59360	61340	63730	60330	68750	45170	35420	52410	29880	23940	51290	58790	36890	28780	105700	105600	112200	49110	39780	42360	23000	19480	32440	164200	165100	123300	32570	53620	57480	47430	41460	52850	127000	94210	138000	22430	42280	29070	53340
Com_802_pos	5-Aminovaleric acid	C5H11NO2	117.079	18.27	Amino Acid And Derivatives	"660-88-8"	12190	11570	11000	10850	12310	11660	9182	7668	6300	8231	8926	12330	10370	10870	11190	15420	14560	12240	10260	11870	13140	13070	10840	10270	9720	7771	9684	10760	9454	8568	7664	7915	6334	6424	6999	4956	7090	5854	6104	7053	5203	4961	6169
Com_803_pos	Cucurbitacin I	C30H42O7	514.293	0.67	Terpenoids	"2222-07-3"	148700	138000	200900	66600	52500	251900	255000	231900	243800	234100	246700	277800	248000	148700	137000	115700	160300	192500	145800	244200	198200	132100	204700	215800	18740	104800	100700	232000	146500	162400	98820	170100	271900	76200	27470	31030	129900	142500	151200	361800	213300	255900	124000
Com_804_pos	Asp-phe	C13H16N2O5	280.106	5.12	Amino Acid And Derivatives	"13433-09-5"	256700	202500	387600	34650	16790	34910	52300	36560	65390	33000	57680	45540	297800	230800	183100	134900	123700	122200	217400	217400	184400	137300	96290	120800	129100	104000	116300	179300	225400	148100	111000	103900	122200	98320	88080	59640	137800	129000	121200	140500	158100	121800	139200
Com_805_pos	6-Aminocaproic acid	C6H13NO2	131.095	2.07	Fatty Acyls	"60-32-2"	24170000	21600000	23280000	1379000	824000	1446000	1301000	1520000	1344000	626400	685900	571000	9693000	9616000	9492000	6871000	7076000	8080000	3802000	4493000	3937000	6142000	6490000	7767000	5889000	3886000	4148000	3310000	3854000	2689000	1859000	1906000	1727000	537300	630900	504100	2824000	2964000	2482000	2295000	2523000	2128000	609200
Com_806_pos	Dihydrojasmone	C11H18O	166.26	11.468	Carbonyl compounds	"1128-08-1"	708200	787100	691000	698500	620600	725800	712300	710900	600500	653600	670100	629000	605700	676900	653900	677300	651900	689000	668500	734600	623700	651900	604600	611700	659200	616200	669500	651300	693100	560200	623900	563600	572800	607300	607900	577000	658300	635700	598500	560800	563200	602200	539800
Com_807_pos	2-Phenylethylamine	C8H11N	121.18	4.584	Amines	"64-04-0"	87350	71000	83320	47750	21880	46100	48230	37610	34950	48340	53090	49250	70430	88480	66800	50060	36220	57790	41400	48530	35050	59380	60130	64630	45090	42520	71410	41640	55460	37500	41500	34580	34890	29030	35860	31160	58240	55120	45280	53150	46880	51070	22270
Com_808_pos	5-O-Methylvisammioside	C22H28O10	452.45	7.037	Flavonoids	"84272-85-5"	207300	263000	153100	182500	157500	181400	108500	123600	104200	74580	74780	48250	235100	359000	254300	475100	374200	464000	296500	351400	291600	196700	208100	243100	418500	488600	411200	271400	283600	270600	167400	159200	192700	252900	307200	256500	286500	316900	344300	130700	125700	127200	118700
Com_809_pos	Oxidized glutathione	C20H32N6O12S2	630.646	1.06	Amino Acid And Derivatives	"121-24-4"	4611000	5867000	3792000	2188000	1411000	2000000	1695000	1255000	1818000	794900	1413000	914700	1899000	2044000	1918000	359100	399100	471000	3618000	3816000	4780000	1294000	869100	1401000	275200	265300	276400	3116000	2738000	3362000	915900	1168000	905800	342800	340900	261300	2033000	2971000	2378000	1804000	1913000	2438000	1051000
Com_810_pos	Glu-Glu	C10H14N2O7	276.243	0.99	Amino Acid And Derivatives	"3929-61-1"	13920	23290	29800	10630	7639	25350	34890	18270	46500	17730	15020	10480	12880	12790	28220	20288	3017	6004	48150	40360	47040	8059	20930	8288	5142	4542	18800	40330	21560	30420	19010	23980	15910	13891	30330	14792	48930	26240	39410	8540	19110	22390	8010
Com_811_pos	DL-Glutamine	C5H10N2O3	146.14	0.84	Amino Acid And Derivatives	"6899-04-3"	384800000	358000000	378100000	84420000	66620000	78680000	106100000	130500000	105200000	48180000	47620000	48270000	284100000	287000000	282600000	262700000	256400000	275400000	143200000	160900000	129800000	203500000	201200000	234900000	208600000	188000000	181400000	125300000	125200000	123300000	128500000	123000000	114300000	38870000	33390000	33970000	129900000	146200000	131900000	175100000	174200000	165500000	66470000
Com_812_pos	VitaMin U	C6H14ClNO2S	199.7	0.75	Vitamins	"3493-12-7"	29520000	29230000	28300000	1045000	1097000	886100	1037000	1550000	1088000	445200	585700	533700	16270000	17500000	19010000	6726000	7578000	7094000	9163000	9685000	8653000	8496000	8564000	9684000	3898000	3028000	3303000	1848000	1722000	1631000	1186000	1010000	1124000	224800	245900	220700	1627000	1887000	1739000	1255000	1223000	1232000	325600
Com_813_pos	L-lysine	C6H14N2O2	146.19	0.74	Amino Acid And Derivatives	"56-87-1"	380500000	375800000	391700000	92420000	71510000	90680000	117300000	139600000	117100000	54390000	54170000	52970000	311700000	309100000	304700000	287100000	277700000	300600000	157700000	178800000	144000000	226200000	229400000	254300000	232400000	204000000	213700000	145300000	145600000	134900000	138300000	147500000	125800000	43760000	41770000	41510000	153700000	164000000	142600000	194200000	186300000	188400000	72570000
Com_814_pos	Thiamine	C12H17N4OS+	265.354	0.81	Vitamins	"70-16-6"	638200	761300	816000	25350	51440	30190	16580	12910	124370	81623	5941	5084	380000	406200	526200	34770	63940	25920	735500	538900	663700	205400	147400	172900	30330	38580	32020	189000	127500	114800	29400	26170	98640	17520	13960	15520	95820	101500	63470	18910	26070	57680	20640
Com_815_pos	Sedoheptulose Anhydride	C7H12O6	192.167	10.15	Carbohydrates And Its Derivatives	"469-90-9"	6743000	7033000	6930000	6345000	6216000	6433000	6387000	6068000	6185000	5753000	5917000	5365000	5493000	5596000	5666000	5755000	5839000	5442000	5769000	5159000	5848000	5478000	5481000	5998000	5454000	5693000	5474000	5391000	5302000	4975000	5696000	5242000	5231000	4826000	5152000	5020000	5348000	5132000	5377000	5354000	5025000	5177000	4777000
Com_816_pos	Kynurenic acid	C10H7NO3	189.17	5.296	Quinolines and derivatives	"492-27-3"	18250	9863	73476	32090	32500	43180	16240	9252	15760	8537	15850	5459	15220	17590	79657	13460	12520	19460	88220	62950	77650	18240	27420	21310	17930	18980	24470	149600	146000	117200	191300	231500	234600	105900	107500	98100	180600	130700	155600	306200	241800	197700	397900
Com_817_pos	Phe-Phe	C18H20N2O3	312.363	6.51	Amino Acid And Derivatives	"2577-40-4"	237500	161200	294200	19800	13320	15340	24260	15730	19940	14240	14800	9335	289400	248500	148400	56130	82490	65580	188500	152700	202200	124300	62000	118900	38320	40580	73110	144600	126600	89290	70530	72390	114700	43680	64740	44740	65270	94330	74380	132800	176600	93830	104900
Com_818_pos	beta-Nicotyrine	C10H10N2	158.2	4.91	Alkaloids and derivatives	"487-19-4"	435500	373300	377700	19020	9926	8863	66840	62710	55570	24050	12730	22680	102100	75720	81820	117900	105100	128100	18550	33630	27420	90260	112200	102700	96080	77730	101600	20180	42800	12480	23770	25180	20600	28610	34010	19630	15950	14050	14530	14990	28390	30490	6326
Com_819_pos	delta-Hexanolactone	C6H10O2	114.142	1	Lactones	"823-22-3"	130300	134300	93090	205300	143600	127800	114792	97058	121500	88295	110400	105900	198700	156600	75000	33400	128800	103600	102400	125800	147800	94940	103600	57450	110500	147900	102700	147100	102300	95850	51610	69370	88320	80740	85240	126500	175300	100800	140200	102800	145600	83540	76090
Com_820_pos	LysoPC 19:0	C27H56NO7P	537.71	3.95	Phospholipid	"108273-88-7"	46520	46800	48560	9585	18424	11500	3949	15642	10004	6326	8251	10512	15310	20000	20940	8056	5860	11750	11470	16540	12170	5604	11350	9419	8428	7615	29448	8187	7418	5076	4549	4497	6352	5845	8787	7008	6199	6713	5342	6696	6280	6477	5608
Com_821_pos	Scopine	C8H13NO2	155.19	0.87	Organoheterocyclic compounds	"498-45-3"	42250	41300	62330	7880	11593	8777	25550	31390	31910	43580	48060	10120	42190	26270	26650	19890	17590	8336	11530	6034	14980	16380	24190	30890	18390	14410	14470	14506	5322	10140	12020	19440	17180	12740	15827	10950	15466	11210	13710	29530	29230	26380	22720
Com_822_pos	Linoleic acid	C18H32O2	280.445	14.46	Fatty Acyls	"60-33-3"	580900	1280000	691500	462200	267800	370600	339200	358700	349000	503300	222500	382600	795200	680100	562900	786700	612600	646700	843200	763300	1103000	664000	636000	652700	624400	678700	372500	823000	452600	606000	502100	432500	523300	618300	607000	507800	549600	541000	519200	409700	504300	388400	496800
Com_823_pos	Xanthurenic acid	C10H7NO4	205.167	5.06	Quinolines and derivatives	"59-00-7"	574500	483500	539900	7574	17190	10210	53550	82480	53390	19120	13860	23630	118900	93440	111200	110100	118500	166600	17380	24050	32070	102200	109900	112400	150400	114500	114600	19250	46630	19680	24070	23080	24330	24160	17620	13730	22370	24070	16870	24550	21250	20120	5280
Com_824_pos	Yamogenin	C27H42O3	414.621	0.9	Steroids and steroid derivatives	"512-06-1"	24250	14430	21480	42860	16110	22860	14230	18940	9833	18420	12950	29000	17980	9635	11070	13340	8083	8357	25240	27290	16420	10700	5482	9760	10828	4577	8599	22010	10950	19940	6192	11070	20600	9201	14590	6170	27730	19230	19100	7399	4812	25780	22980
Com_825_pos	LPC(1-acyl 18:1)	C26H52NO7P	521.67	12.76	Phospholipid		12970000	23480000	19240000	1818000	902400	1588000	2393000	2223000	3269000	950200	1105000	1662000	19900000	20700000	19240000	5904000	4410000	3604000	8088000	11240000	10860000	9039000	11030000	7350000	2104000	2409000	2873000	2990000	3251000	2653000	4123000	4209000	3317000	2047000	3254000	2517000	2879000	2689000	1990000	2413000	2638000	2055000	1375000
Com_826_pos	LPC(1-acyl 18:2)	C26H50NO7P	519.65	12.18	Phospholipid		310000000	336300000	322600000	38890000	18280000	31980000	93030000	105100000	123500000	51790000	58300000	84240000	295600000	298300000	285100000	177300000	137700000	151500000	213800000	249400000	247700000	209900000	235000000	207000000	92910000	113400000	124500000	67190000	71070000	62910000	104700000	107500000	80710000	55330000	92500000	59710000	51770000	42680000	40460000	66320000	55650000	46530000	26260000
Com_827_pos	LPC(1-acyl 16:1)	C24H48NO7P	493.61	11.54	Phospholipid		4976000	7068000	5093000	211200	90340	221500	486600	457800	622200	271300	323900	397600	3510000	3899000	2931000	1038000	672100	867900	1581000	2192000	2045000	1646000	1808000	1442000	417900	627900	714300	443600	503700	415700	781800	838400	598800	401500	763000	451000	384400	302800	289200	496100	416800	352600	229000
Com_828_pos	LPC(1-acyl 16:2)	C24H46NO7P	491.6	10.99	Phospholipid		3481000	4291000	3029000	190200	81480	165500	315500	374000	474600	151900	173300	237200	1881000	2038000	1525000	384100	291800	341000	1119000	1575000	1455000	991800	1197000	1004000	164500	281800	277100	286300	348700	291100	465000	482300	307500	141400	211400	159900	243300	230400	173400	265500	218100	207600	82100
Com_829_pos	LPC(1-acyl 16:0)	C24H50NO7P	495.63	12.59	Phospholipid		1852000	2304000	4063000	1141000	563600	922600	1002000	817900	981900	687700	724200	825500	1386000	1519000	1134000	1100000	786900	941000	3466000	3508000	3842000	1045000	881400	1311000	828900	643500	957400	2585000	3076000	2251000	1051000	1260000	1075000	792900	1058000	1173000	2455000	2185000	2650000	733700	1288000	968500	1046000
Com_830_pos	Limocitrin O-hexoside	C23H24O13	508.43	0.97	Flavonoids		27930	32260	45800	21440	18600	11460	10820	23760	13450	7681	16866	6164	11040	13490	15100	17590	23490	23750	45330	27010	41600	11930	25580	18960	40500	23550	31780	38210	42940	36270	30390	30780	25310	19770	52970	47680	54200	56140	60960	39140	35590	33680	87690
Com_831_pos	L-Homocystine	C8H16N2O4S2	268.354	2.5	Amino Acid And Derivatives	"626-72-2"	5612000	3865000	10150000	1084000	533700	1072000	5918000	1108000	2691000	949500	1540000	828000	9932000	12240000	14030000	224400	236900	234400	26280000	28140000	25050000	10640000	11960000	11750000	261700	226400	242600	24620000	23280000	21270000	13580000	12970000	12780000	178000	222000	207900	21300000	20660000	18340000	17330000	16430000	13630000	2917000
Com_832_pos	Imidazole-4-acetate	C5H6N2O2	126.1	0.96	Organoheterocyclic compounds	"645-65-8"	2203000	1984000	1965000	1380000	989400	1338000	862000	691600	750400	395800	500300	456400	1486000	1553000	1572000	1518000	1338000	1436000	2105000	2112000	2219000	1236000	1255000	1264000	1190000	1056000	1026000	1376000	1398000	1258000	797100	803200	580400	484700	619800	507700	1281000	1390000	1361000	971900	816100	810300	614200
Com_833_pos	Nicotinic acid adenine dinucleotide	C21H28N7O14P2	663.2	1.04	Nucleotide and its derivates		548900	386500	338600	275200	264500	232600	75940	179300	167200	44610	48330	24710	87013	8583	3250	66969	67538	73608	141500	174600	185600	4295	22520	26830	2729	54761	4830	13840	16130	32750	10200	9124	2146	34718	30933	26597	53180	70410	39230	3756	11810	16110	30104
Com_835_pos	5-methoxyindole-3-carbaldehyde	C10H9NO2	175.1	11.35	Indoles and derivatives	"10601-19-1"	54380	52480	33430	37880	15030	30170	30660	28240	37730	31690	20160	23720	19890	27180	17100	20490	16090	27190	19070	16170	20900	7600	16350	7910	25090	25720	20160	31820	21070	39280	42680	27340	36760	32820	33360	35550	32450	57340	25140	27660	22580	27420	36580
Com_836_pos	D-Threose	C4H8O4	120.042	1.66	Carbohydrates And Its Derivatives		168700	78030	102300	74201	75247	68536	21880	82867	67511	44760	82252	25650	157200	35980	56420	318200	70320	55260	54230	26880	25650	53410	54860	34940	313700	92880	386200	22990	521700	13680	90450	46040	58900	100200	73300	102000	19760	19450	17441	23920	29780	45220	58030
Com_837_pos	Apo-13-zeaxanthinone	C18H26O2	274.4	8.84	Ketones		1318000	1532000	1106000	58420	12300	50200	301200	59070	189300	72320	156100	146200	1043000	1154000	1292000	280500	194400	218900	2037000	2580000	3119000	489500	383600	413700	179700	193400	196600	1030000	902600	941900	661400	544500	675900	205400	256500	171700	733900	912300	582100	815000	965100	766400	349800
Com_838_pos	Arabidopyl ketoadipic acid	C15H14O9	338.27	15.19	Organic Acid And Its Derivatives		46190	75670	55830	20450	18560	18120	22290	22280	22610	24360	23070	20880	31080	31450	19540	19220	18780	15570	66890	39070	54040	19010	16540	20550	15230	15860	14960	25750	21440	24240	15270	15430	15090	16130	14180	17580	14360	16780	13160	11900	16630	12290	15250
Com_839_pos	Apigeninidin 5-glucoside	C21H21O9	417.39	7.31	Flavonoids		3088000	2948000	2987000	1337000	822400	1235000	2077000	1913000	2261000	1738000	1738000	1863000	1841000	1981000	2107000	1279000	1177000	1157000	1677000	2047000	1895000	1705000	1600000	1795000	1184000	995700	1243000	1527000	1432000	1372000	1713000	1708000	1606000	958700	1086000	994100	1743000	1723000	1667000	2276000	2310000	2212000	1235000
Com_840_pos	B Eupalinolide	C24H30O9	462.49	1.11	Terpenoids	"877822-40-7"	398300	605900	206800	657600	602700	689000	445500	1061000	665800	485700	277900	405600	123800	83660	65890	66250	76010	65430	375300	464600	369200	68490	65420	69500	46100	60080	53760	235300	308500	396600	48850	76510	82400	26050	45740	50240	571300	649800	572700	130300	141000	92560	52870
Com_841_pos	Arabidopyl shikimic acid	C16H16O9	352.29	13.8	Alcohols and polyols		5810	14920	7747	1859	9611	3116	7743	5577	1712	7718	7941	3722	6189	5444	2642	3541	2319	2703	5513	10860	12270	3468	6713	2220	9085	7169	11704	5088	4487	3559	5008	7058	4483	3694	2973	4690	7371	3956	3339	2905	2112	6574	3381
Com_842_pos	N-Formylkynurenine	C11H12N2O4	236.08	4.17	Carbonyl compounds	"1022-31-7"	76010	78910	71780	517700	298300	574900	191700	168400	177700	180700	164500	149600	55180	69200	66180	58850	53680	62150	316200	348000	363200	63880	65600	88930	69490	47470	61170	541500	516700	523600	126700	140200	128900	62680	59030	74230	457000	468900	389100	137300	149300	127100	63990
Com_843_pos	Prunin	C21H22O10	434.121	7.02	Flavanones	"529-55-5"	638400	469600	545200	373100	280900	370000	641100	755900	384400	528900	521200	524200	351100	475000	633300	403900	348300	569700	578700	553500	718800	387100	608900	561000	373300	434000	402700	519700	588900	452800	465000	443600	412800	319700	373200	261200	503800	498100	500700	552900	663300	576500	487300
Com_844_pos	Diethyl glutarate	C9H16O4	188.105	0.67	Fatty Acyls	"818-38-2"	4145000	3451000	3665000	1848000	2202000	2955000	4104000	2749000	2077000	1625000	2135000	2326000	2362000	2594000	2637000	2095000	2033000	2159000	2400000	2610000	2917000	2627000	2757000	2668000	1696000	1243000	1192000	1523000	1288000	1092000	1165000	1324000	1145000	636700	765600	602100	696000	713200	599100	1143000	848800	731700	556700
Com_845_pos	Geraniol	C10H18O	154.25	10.825	Terpenoids	"106-24-1"	124700	110200	175000	26977	21992	27102	61430	51380	68610	43160	50920	57330	70280	76720	41800	22130	18510	16840	7202	5016	37933	40400	41900	48130	19510	17320	18800	29264	36845	8511	32900	42540	24940	7192	20780	23140	37442	36456	5635	28370	36100	19730	20840
Com_846_pos	trans-Zeatin riboside	C15H21N5O5	351.358	5.212	Phytohormones	"6025-53-2"	50870	27160	81780	14511	12369	2224	25470	5087	7515	6915	5207	2158	84300	41640	41010	28050	31530	30610	7449	6984	9659	26340	23490	25890	21480	20690	14800	10940	3740	2338	15550	30500	20110	14940	12980	14210	7776	9835	4130	26000	25320	31730	21440
Com_847_pos	Methyl linolenate	C19H32O2	292.46	16.057	Fatty Acyls	"301-00-8"	40480	22620	62920	93120	72910	87120	41680	51230	62180	35810	43470	49140	55500	32970	36810	32530	66290	42650	91860	92170	69380	50080	40270	38510	35810	40240	48540	112800	130900	112200	48860	39420	28720	39160	44170	57140	79610	95070	109700	47100	51620	56730	43410
Com_848_pos	Methyl linoleate	C19H34O2	294.47	13.221	Fatty Acyls	"112-63-0"	7751000	12780000	4533000	39970	10740	38200	93160	88570	165200	61270	193800	163600	4219000	5814000	7076000	899900	763200	607100	1284000	2442000	3223000	679100	850200	591600	445100	494300	544000	462300	357000	439200	485900	227200	212400	290100	341300	368800	148500	265500	154800	188100	406600	182100	188800
Com_849_pos	SDMA	C8H18N4O2	202.25	0.913	Amino Acid And Derivatives	"30344-00-4"	1244000	982300	986000	522300	592900	651400	903500	928100	756700	788500	746400	770400	626300	588700	606500	410200	411400	419300	463900	542900	607600	574700	554300	581600	384300	302800	327100	382200	350000	280600	376100	363600	303500	223700	261700	225400	256700	235900	218800	355000	266600	232700	202800
Com_850_pos	IAA-Asp	C14H14N2O5	290.271	6.78	Phytohormones		7260000	7471000	6620000	420400	308200	614500	5624000	6252000	5778000	3168000	3611000	3540000	2745000	3199000	3457000	1607000	1740000	1879000	1226000	1758000	1314000	3431000	3472000	3914000	1770000	1428000	1552000	471300	461600	405100	2969000	2796000	2913000	1277000	1624000	1254000	309200	254500	322600	3083000	3231000	2656000	1259000
Com_851_pos	IAA-Glu	C15H16N2O5	304.298	0.72	Phytohormones		114700	94960	105300	63140	55000	79980	122000	96780	94860	110200	103500	69430	119300	98020	104200	52120	61380	70380	96270	92810	80730	102400	54650	87900	53100	51180	22320	47910	51540	52020	78160	77150	51760	25990	31230	14320	34480	31710	28530	69410	78890	54020	58930
Com_852_pos	Inosine-5'-monophosphate	C10H13N4O8P	348.206	1.05	Nucleotide And Its Derivates	"21214-07-3"	1168000	1201000	897500	720800	447900	756000	231200	301400	336500	154900	215800	96150	101600	137700	115200	96660	85500	119300	1151000	1624000	1847000	88310	119900	115400	90580	56140	80860	645800	663100	1015000	65990	97450	46770	47390	64340	43140	995400	1786000	1772000	95310	62810	83890	47060
Com_853_pos	Irisolidone 7-O-beta-d-glucoside	C23H24O11	476.43	0.97	Flavonoids	"6009-88-7"	23470	5683	6363	16560	4300	9218	8879	10400	4145	8031	10360	8580	5931	11291	5396	12809	11190	12419	20460	20790	33450	7633	6400	13430	10866	9258	10688	15750	11840	25920	10936	9315	10301	7871	4439	8970	18220	18560	27090	10037	12039	10394	7722
Com_854_pos	Isorhamnetin rutinose or hexose-deoxyhexose			6.7	Flavonoids		26970	18920	15050	6873	13220	16330	7933	83760	40770	15440	23550	45410	1470	950	495	10755	8166	9259	3892	3943	3415	490	8748	493	7527	7591	10371	342	3104	3462	5478	1908	9858	4504	5454	998	1414	6559	4979	6094	4532	2677	1909
Com_855_pos	5-Aminolevulinic acid	C5H9NO3	131.13	0.872	Carbohydrates And Its Derivatives	"106-60-5"	116200	101700	93760	10480	17460	10670	6589	5403	6699	5920	3577	7887	45020	36080	56620	35790	25250	32240	22200	25970	24250	16280	17190	28280	26840	23150	30540	18730	15040	10190	10530	11300	8848	6821	8376	13845	8153	17800	15030	18130	13270	7319	6259
Com_856_pos	Isoferulic Acid	C10H10O4	194.18	7.008	Cinnamic acids and derivatives	"537-73-5"	29860	42943	48443	14590	21860	19195	10830	14440	11130	37120	24519	21383	18910	18670	30230	88620	62670	67170	70920	119200	111900	20280	29670	20740	73250	61740	41050	20330	6892	14970	5483	24337	17110	12000	24297	29790	14540	11980	10720	24335	22325	21586	19191
Com_857_pos	3alpha-Dihydrocadambine	C27H34N2O10	546.574	6.61	Indoles and derivatives	"54483-84-0"	12600	19430	17670	180100	93600	215800	43110	39070	26500	28890	53763	15380	20580	16580	38330	55350	40390	49190	331300	199400	313400	65590	35130	48110	56070	30090	37310	163300	214700	173500	33570	58470	63510	33510	22120	24130	81400	141800	104100	75560	28280	33850	22300
Com_858_pos	Peimine	C27H45NO3	431.651	7.012	Alkaloids and derivatives	"23496-41-5"	57780000	56960000	57740000	3968000	2182000	3569000	18470000	16900000	20160000	18190000	19150000	17720000	30160000	30250000	26330000	19840000	18720000	21100000	20300000	22530000	22640000	22530000	24390000	23400000	18830000	16530000	16720000	7057000	7413000	6814000	14660000	14430000	12540000	11760000	15000000	12050000	4871000	3939000	4011000	15730000	13630000	13750000	8617000
Com_859_pos	Homoplantaginin	C22H22O11	462.403	7.186	Flavonoids	"17680-84-1"	87220	34350	79270	41470	20710	39280	19780	20580	35710	13930	20421	29430	19450	33520	60780	22530	14330	20840	84130	124100	62010	42550	39480	21690	31760	25260	29690	50020	84900	60430	17540	47580	24620	25650	4858	10070	83400	72200	40060	38000	41490	44120	15330
Com_860_pos	7-Hydroxy-4-methyl-8-nitrocoumarin	C10H7NO5	221.166	9.743	Coumarins and derivatives	"19037-69-5"	1950000	2121000	2374000	2411000	2182000	3413000	4189000	2512000	1870000	4216000	3631000	2044000	2275000	2094000	2516000	2659000	2390000	2691000	2510000	1927000	2243000	1912000	3002000	2317000	1880000	2572000	3665000	1972000	2847000	1711000	1830000	1921000	1809000	2130000	3421000	1987000	2389000	2658000	1835000	2535000	1944000	2007000	1874000
Com_861_pos	Efetaal	C12H18O2	194.27	9.086	Benzene and substituted derivatives	"2556-10-7"	850900	811900	885700	720400	668700	770700	882700	986600	917800	935300	924600	916700	792400	835900	897100	819000	637800	848700	767900	901200	813800	718200	686200	732000	719700	731800	719000	790800	670500	651700	717500	679200	723200	712400	676500	713100	764400	722100	817400	637100	717000	605900	725500
Com_862_pos	Palmitoylethanolamide	C18H37NO2	299.492	14.41	Organic Acid And Its Derivatives	"544-31-0"	19870	13870	21370	21650	21970	18870	19320	17340	21360	19530	18140	19650	31170	25250	18700	48090	20160	21410	20880	19190	26140	21570	18040	20390	38920	23900	122000	25340	34220	16760	33150	20410	39000	23570	23440	28780	17970	20210	19770	19460	30540	23070	19650
Com_863_pos	Polygodial	C15H22O2	234.334	12.92	Terpene	"6754-20-7"	3331000	3336000	3409000	3315000	3367000	3271000	3277000	3214000	3275000	3271000	3382000	3091000	3303000	3229000	3452000	3378000	3360000	3307000	3289000	3488000	3417000	3408000	3130000	3394000	3461000	3394000	3129000	3272000	3394000	3397000	3176000	3247000	3386000	3172000	3411000	3257000	3223000	3432000	3306000	3220000	3397000	3254000	3288000
Com_864_pos	p-Nitroaniline	C6H6N2O2	138.124	2.02	Benzene and substituted derivatives	"100-01-6"	273900	281900	266100	304100	149200	361100	154200	147000	136700	235600	240900	203100	55290	84830	100600	27090	38920	47880	402200	389800	415300	70200	92040	98830	47090	68820	55420	314100	322100	293700	105100	114900	94340	71380	25580	46100	325400	286800	251100	148900	153800	121100	116900
Com_865_pos	1,2-Benzenedicarboxylic acid	C8H6O4	166.131	4.11	Benzoic acids and derivatives	"88-99-3"	949800	833900	957700	182900	98290	194000	122700	142000	131700	58980	79700	64780	836100	807300	800700	554600	554500	611200	301800	386600	333100	452800	450400	549300	472300	326200	391000	443100	500800	373000	173700	177700	171800	75440	89020	75600	355800	351200	311100	226900	260900	211400	94250
Com_866_pos	Phe-Pro	C14H18N2O3	262.304	5.58	Amino Acid And Derivatives	"7669-65-0"	113800	99010	135200	48650	33120	49400	22940	30730	21060	20120	22750	33937	74670	68630	49610	41130	18180	22630	224100	170400	191600	29730	25630	43420	49290	9442	43200	112800	133600	93020	52570	21910	32120	13590	22860	23690	77650	60320	79210	31670	25730	23750	8567
Com_867_pos	p-Coumaraldehyde	C9H8O2	148.159	0.89	Phenylpropanoids and polyketides	"2538-87-6"	1718000	1565000	1545000	3116000	2088000	2925000	1082000	1299000	1230000	993800	967900	962300	930400	988900	975500	746600	703900	916300	1743000	1775000	1674000	924600	1125000	1181000	683100	630300	628800	1556000	1585000	1517000	937100	1090000	750500	561400	608700	632400	1343000	1504000	1405000	765100	764200	743000	638500
Com_868_pos	(+-)-Baclofen	C10H12ClNO2	213.661	9.22	Amino Acid And Derivatives	"66514-99-6"	1019000	901100	970400	861800	837800	872800	908200	858300	790700	871100	799500	823200	851500	853000	842100	875700	860400	857100	902200	869400	885100	919300	925000	877600	925000	834000	882400	891700	898000	948400	809100	813100	815700	839200	811600	811900	793400	831900	817100	833200	816000	863300	793300
Com_869_pos	N-Hydroxyl-tryptamine	C10H12N2O	176.215	0.88	Amino Acid And Derivatives	"4761-34-6"	676000	885700	801300	393600	315900	475700	354100	327700	322100	247700	281800	283200	184800	220500	190400	117900	107400	150900	129700	168600	143000	174000	179500	183000	153100	133700	150500	615700	611100	485600	400300	440700	397900	148900	159900	162900	846700	709400	649500	835600	807000	650200	283200
Com_870_pos	8-C-hexosyl chrysoeriol O-hexoside			0.92	Flavonoids		59630	33680	74380	34220	11830	36300	17930	20570	30370	12580	14180	7658	17320	31250	19770	11330	14089	10740	59220	46440	42270	19810	31800	27480	11210	7407	19949	29230	25910	34880	9184	31860	10440	15480	11000	18565	43120	72380	57310	24080	22340	39630	13975
Com_871_pos	Tricin O-glycerol			14.58	Flavonoids		15970	31320	12020	8008	18604	3033	6028	5498	2555	5588	6252	5492	15950	11170	5171	10670	8455	6802	12020	9122	20400	8938	7800	5502	3678	5454	3221	5274	8193	2756	2666	5044	2744	3559	4160	3471	8502	4083	6861	1453	4807	5449	5684
Com_872_pos	Azoxystrobin acid			10.49	Ethers		39280	34740	40870	22520	15580	19940	66980	31940	49350	46280	35910	41560	57040	40730	35350	61360	45440	43960	39400	44760	41830	70890	59880	49510	58940	47390	51610	35840	48410	35120	44000	39900	41270	40790	48910	67290	48790	43140	31690	89430	135000	75260	59330
Com_873_pos	thiamine phosphate	C12H18ClN4O4PS	380.787	0.84	Nucleotide And Its Derivates	"532-40-1"	131300	106400	210600	16650	16230	12350	11460	7861	7662	4176	8857	8332	140200	125600	122200	52130	46850	45280	466700	418600	498800	58920	63640	46750	32340	40550	34320	294000	263300	225300	26910	34880	30990	20840	25000	22430	220400	153700	137500	32440	28700	22390	15650
Com_874_pos	LysoPC 20:2	C28H54NO7P	547.7	13.26	Phospholipid		20220	42190	51640	13960	7563	9564	27090	26870	34310	12650	18840	26290	71880	57040	48080	26690	9863	22720	43670	51880	49940	36230	36940	25840	16670	11800	17900	26150	35390	21030	24380	27380	21830	16220	27770	24850	24250	28000	17690	14770	19010	15860	7117
Com_875_pos	p-Mulegone	C10H18O	154.249	18.25	Ketones	"89-80-5"	15060	17220	6623	11910	12270	14050	10990	14280	10850	11460	11150	11240	10350	11070	15260	18180	16150	20330	23940	8838	14680	12920	11030	13880	19770	8543	11760	12590	12720	13490	9630	7998	9189	5904	6847	9338	8082	7022	5328	5570	7587	6028	4695
Com_876_pos	gamma-Glu-Leu	C11H20N2O5	260.287	5.17	Amino Acid And Derivatives	"2566-39-4"	333400	303900	301800	11270	14010	24600	55010	58430	73040	26690	21430	13930	209900	106200	100100	161000	124900	141100	98930	110700	126800	100000	85580	116500	235300	93680	135000	40900	165400	34430	47170	52060	48100	25660	34940	22350	22900	20170	19470	69090	63320	57410	13490
Com_877_pos	4-Hydroxybenzoate	C7H6O3	138.121	4.12	Benzoic acids and derivatives	"99-96-7"	71540	102000	85250	59270	32690	67670	90340	56240	54770	43830	77940	87190	39620	34320	53270	27470	36520	41780	113300	122800	103600	40660	51500	44740	34750	20950	22140	53170	58360	36380	49250	41170	28190	17130	22910	8644	43550	45900	37290	45850	44120	46590	24160
Com_878_pos	2-Ethyl-3-hydroxy-4H-pyran-4-one	C7H8O3	140.14	1.15	Organoheterocyclic compounds	"4940-11-8"	212000	154100	203400	130200	121500	137200	142900	141600	138400	169000	146700	172400	152000	155200	149800	83160	59580	155300	224200	290500	249200	119300	122700	123300	89290	86800	65400	144900	112600	138800	97890	86310	91930	63230	74840	45340	127600	148200	108500	105100	104600	92890	122000
Com_879_pos	Resokaempferol 7-O-hexoside	C21H20O10	434.4	7.08	Flavonoids		57570	35688	55540	19086	19406	20880	25080	31490	53100	12790	54500	24950	46400	30450	27140	25240	20060	45510	14730	29080	21160	43370	15730	31830	10040	17750	17810	26758	26511	34150	29080	22990	23180	18201	22490	16410	33915	26467	26201	37640	35500	37130	47160
Com_880_pos	Chrysoeriol 7-O-hexoside	C22H22O11	448.4	7.2	Flavonoids		47650	73600	62020	38370	25880	63000	45200	42860	30250	12220	19340	11870	21330	24510	19090	27100	15700	17670	84590	89340	112800	34270	21270	31610	13270	28860	14630	52750	43760	51740	5871	24900	16840	13980	17710	30090	66130	46760	52530	25910	24460	23260	12400
Com_881_pos	methylLuteolin C-hexoside	C22H22O11	448.4	0.71	Flavonoids		187500	163800	114000	59350	43570	109000	157300	106100	125900	136800	150200	112200	109700	82900	113900	56780	79910	75330	85050	111000	77880	76630	100800	129500	58340	53870	45550	85550	75450	99050	88510	93620	85510	32410	38330	39190	53730	67740	49350	128500	113100	95910	56290
Com_882_pos	Tricin 4'-O-(syringyl alcohol)ether derivative			1.08	Flavonoids		160500	80130	114200	29310	31670	13400	13390	21860	42710	15551	16470	7156	44500	58280	39730	22860	36520	47270	12960	38154	32067	25650	41500	45730	27530	18780	40490	14410	35810	17050	22090	38460	18070	16213	17080	14340	15070	24460	37860	64080	46610	54090	26360
Com_883_pos	2'-O-methyladenosine	C11H15N5O4	281.268	4.14	Nucleotide And Its Derivates	"2140-79-6"	180700	193100	235000	20720	14810	35160	76990	37790	51000	29360	33320	28750	517400	438700	354000	259600	229600	230300	278400	303500	318200	364400	228700	307300	225100	209400	213700	157200	146400	143400	205100	161500	268900	106200	143700	134900	101100	81930	84010	257200	278200	204500	135700
Com_884_pos	N-Acetyl-L-leucine	C8H15NO3	173.21	1.04	Amino Acid And Derivatives	"1188-21-2"	4940000	4920000	4410000	2773000	1153000	2945000	5243000	4499000	4425000	3409000	5253000	4259000	2617000	2807000	2786000	2403000	2556000	2686000	3563000	3615000	3842000	4508000	4615000	4725000	3694000	4079000	3361000	3823000	3118000	3151000	7653000	9367000	7206000	5942000	6601000	5478000	2903000	2805000	2742000	10600000	9386000	8134000	7649000
Com_885_pos	2-Phenylglycine	C8H9NO2	151.163	2.78	Amino Acid And Derivatives	"2835-06-5"	4192000	3301000	3797000	607700	330900	594900	2226000	848600	1714000	587000	1039000	937600	2373000	1819000	2033000	309400	353500	287100	5292000	5994000	5016000	2098000	2331000	2146000	438500	539200	432000	3925000	3594000	3305000	2141000	2167000	2033000	511500	406700	419400	3383000	3178000	2870000	2629000	2439000	2024000	1260000
Com_886_pos	N-Acetyl-Dl-glutamic acid	C7H11NO5	189.166	1.84	Amino Acid And Derivatives	"5817-08-3"	1107000	977000	1003000	7576000	4311000	7948000	4947000	4961000	5570000	2869000	3408000	2823000	381300	334400	349100	147400	134200	169400	3642000	4192000	3661000	867800	1069000	1203000	306200	314100	300500	8783000	9009000	6977000	6534000	7461000	6535000	1522000	1795000	1612000	9134000	8669000	7660000	11470000	11170000	9552000	4413000
Com_887_pos	N6-Succinyl Adenosine	C14H17N5O8	383.313	4.54	Nucleotide And Its Derivates	"4542-23-8"	3133000	2874000	2900000	621300	319800	618200	1720000	1698000	1759000	743500	772600	731100	1218000	1363000	1373000	448200	420200	472900	1872000	2378000	1988000	1168000	1206000	1270000	477000	388900	360600	972700	997000	889900	1033000	1069000	1041000	394300	439300	303200	698900	576700	690800	1318000	1329000	1112000	541200
Com_888_pos	N-Acetyl-L-histidine	C8H11N3O3	197.191	1	Amino Acid And Derivatives	"2497-02-1"	86050	97580	110200	84820	58180	69620	64360	82070	76500	225900	213000	156100	29220	39090	44200	71180	54150	87900	81470	85830	61170	35690	36150	32310	61610	71610	65870	60050	46150	38520	30850	46620	29700	53050	62470	69010	84460	77590	62480	35590	37080	48240	39340
Com_889_pos	(-)-trans-Carveol	C10H16O	152.233	0.73	Terpenoids	"2102-58-1"	188000	163900	193000	119600	82550	109700	204400	137800	148800	83730	140700	144400	136900	170300	162400	107800	103900	134700	182400	145300	128900	163800	168000	153000	94490	74260	74230	135400	107100	99310	91010	113800	92640	47190	69820	47210	84750	86230	63150	102900	140900	116200	55120
Com_890_pos	2-Hydroxy-6-Aminopurine	C5H5N5O	151.126	2.76	Purines and purine derivatives	"3373-53-3"	3931000	3284000	3657300	593100	349400	569300	2180000	870700	1731000	573100	995500	1065000	2351000	1794000	2028000	305000	347100	267600	5379000	6090000	5008000	2181000	2437000	2454000	394000	601500	446300	3965000	3524000	3364000	2235000	2217000	2084000	500100	421600	407300	3357000	3210000	2779000	2467000	2722000	2224000	1269000
Com_891_pos	Quinone	C6H4O2	108.021	0.93	Carbonyl compounds	"106-51-4"	997800	895500	839100	698600	570700	768700	433500	408900	366700	327500	349100	361500	704500	659900	561800	455400	580300	599900	831700	781800	752100	467500	488400	534200	454500	398900	464900	559300	602200	638300	394500	350800	284600	219600	316800	288500	568200	677700	638600	437700	445800	398100	355800
Com_892_pos	Guanosine monophosphate	C10H14N5O8P	363.058	1.01	Nucleotide And Its Derivates		1801000	2631000	885400	1146000	379700	795600	383500	1141000	1325000	505600	391900	233500	146700	115100	127000	46550	60530	33830	1056000	1572000	1815000	105200	97120	101100	24130	135500	38580	662500	564200	857400	100700	70350	98440	35050	42790	12330	659100	1140000	1141000	102700	137900	67680	105100
Com_893_pos	Lactucin	C15H16O5	276.1	0.67	Lactones	"1891-29-8"	5307000	3947000	4156000	1853000	1587000	2339000	4317000	3569000	3181000	2907000	4031000	3595000	3243000	3722000	3756000	2510000	2167000	2542000	3389000	3673000	3551000	3448000	3564000	3686000	1831000	1422000	1196000	1818000	1710000	1481000	1632000	1485000	1329000	653800	773500	647600	834900	760400	624900	1371000	1312000	1111000	669600
Com_894_pos	DL-threitol	C4H10O4	122.058	0.67	Sugar alcohols	"6968-16-7"	11670000	10370000	10620000	6371000	4903000	7415000	10460000	6890000	5386000	4318000	7419000	8411000	8678000	9293000	10110000	7925000	8490000	9243000	9892000	9803000	11120000	9926000	10510000	10300000	7000000	5237000	4897000	5805000	5199000	4258000	5306000	4955000	4494000	2611000	2919000	2359000	2995000	2604000	2271000	4370000	3096000	3037000	2460000
Com_895_pos	Enterodiol	C18H22O4	302.152	16.98	Lignans	"80226-00-2"	142400	94300	134100	119900	119200	124700	105600	109400	91280	113800	106100	106300	151600	109700	146800	141200	144200	155100	148000	144400	154600	151100	121600	119400	126700	138100	134900	155100	154900	132600	119900	82710	94380	101200	129300	120400	118000	143000	131100	146800	131700	153400	110700
Com_896_pos	Methionine sulfoxide	C5H11NO3S	165.046	0.75	Amino Acid And Derivatives	"62697-73-8"	1209000	1177000	1001000	161200	148200	145500	196200	270800	280600	252700	333400	357600	690700	624800	976500	372900	338500	345200	412200	512400	410500	405600	479000	433500	207600	164400	187100	134000	145800	107100	106000	124800	109600	71910	55790	50580	110300	70100	99360	100600	97060	82720	63950
Com_897_pos	(5-L-Glutamyl)-L-amino acid	C8H14N2O5	218.09	1.01	Amino Acid And Derivatives	"5875-41-2"	20920	43970	13700	106400	61760	125000	24380	31890	41540	27540	41750	26330	28660	10210	12110	19730	24827	24270	151200	126800	94710	32968	20720	22840	13480	25380	16910	117500	128400	141300	36878	26530	27180	12510	27510	6757	122000	165000	167200	69640	39370	33960	14540
Com_898_pos	Isonicotinic acid	C6H5NO2	123.11	1.029	Vitamins	"55-22-1"	5501000	6146000	6691000	1712000	835700	1899000	2448000	1655000	2322000	1985000	2122000	1460000	4779000	3409000	4431000	5654000	4863000	5803000	3495000	3179000	4430000	2228000	3591000	4299000	4757000	3920000	4109000	4492000	4381000	3151000	3754000	4361000	5372000	2440000	3962000	3262000	3750000	4279000	3537000	3833000	5593000	4168000	2935000
Com_899_pos	D-Arabitol	C5H12O5	152.15	0.926	Sugar Alcohols	"488-82-4"	92430000	88690000	95260000	6897000	7265000	7375000	5797000	6743000	6099000	2211000	2154000	2284000	46910000	46670000	46560000	14210000	16610000	14170000	55910000	64440000	53470000	20300000	20050000	23920000	8570000	5132000	6419000	20700000	19610000	18910000	6873000	6275000	6539000	890200	999700	1189000	28380000	33240000	31430000	11120000	12090000	11850000	1551000
Com_900_pos	5-Methylcytidine	C10H15N3O5	257.24	1.036	Nucleotide And Its Derivates	"2140-61-6"	15780	10800	17350	38670	16660	35740	23910	42810	16590	13680	15110	16470	23950	32590	16630	27020	11220	34960	80400	57100	37720	28710	36130	27210	16590	11700	11180	38660	35770	25820	60750	25420	78910	16350	26010	16130	43450	32010	31740	50430	66330	35040	36850
Com_901_pos	Dodecanedioic acid	C12H22O4	230.3	9.452	Organic Acid And Its Derivatives	"693-23-2"	59770	76470	83180	56560	56620	72530	62260	59640	54540	74010	67460	65760	64620	70320	57940	71520	60070	77890	71870	64350	66210	73250	76580	65300	72050	69240	65870	67960	73700	58430	81320	62780	74080	52520	80930	85200	66840	70540	76860	66390	66160	69870	64470
Com_902_pos	Docosanoic acid	C22H44O2	340.584	1.08	Fatty Acyls	"112-85-6"	35790	19750	14040	51230	63010	56200	25140	47530	11270	24650	9735	10370	22130	35610	26410	16230	27230	13780	76580	24880	43830	30930	27720	30990	19290	9811	16940	46090	25480	61100	13920	30100	23210	28690	20160	22420	37860	39350	41770	21340	35620	37420	21150
Com_903_pos	DL-threo-beta-Methylaspartic acid	C5H9NO4	147.129	0.89	Amino Acid And Derivatives		53480	40780	47500	114100	74070	79260	45770	46470	36270	11240	28350	21000	35960	32780	35230	31310	24240	29040	56230	49180	61850	26480	40770	31960	27800	28120	12200	42630	57200	87950	35430	28520	18390	12090	19920	17170	48500	36400	34640	23820	23200	27210	20230
Com_904_pos	D-Sorbitol	C6H14O6	182.172	0.89	Sugar Alcohols	"50-70-4"	3506000	3268000	3169000	1935000	1478000	1649000	2217000	3436000	3600000	3635000	2705000	2473000	1958000	1634000	1397000	888700	743200	786700	885500	1053000	1194000	1011000	1132000	1252000	1040000	1011000	1045000	1390000	1380000	1241000	1847000	1890000	1958000	1247000	1474000	1215000	1414000	1483000	1271000	2312000	1643000	1583000	1391000
Com_905_pos	Dl-2-Aminooctanoic Acid	C8H17NO2	159.226	1.23	Amino Acid And Derivatives	"644-90-6"	233900	98510	138400	261100	128300	174600	214300	247100	253900	201200	249800	191800	42240	57550	72060	62880	129360	55800	132300	190500	167200	134800	72890	62500	61520	67660	51270	319500	312300	362900	173000	198300	204500	66680	74890	71260	386300	400900	308200	340500	371300	353100	154700
Com_906_pos	Sclareolide	C16H26O2	250.38	13.395	Organoheterocyclic compounds	"564-20-5"	29220	19270	27150	15340	14880	10560	11100	35141	33981	10730	28267	28505	6714	24840	37905	26674	23665	29310	283600	151900	218600	36846	34103	37655	26501	18475	27726	185000	145600	195600	3778	8226	8508	3295	20967	20620	97260	150800	121300	41972	18230	5819	17781
Com_907_pos	Kaempferol-3-O-rutinoside	C27H30O15	594.526	6.51	Flavonoids	"17650-84-9"	100600	86440	154300	1447000	1766000	1798000	370300	1010000	489300	408100	340600	312300	1946	76290	11250	5870	23440	4272	7103	22049	4882	8310	29181	22325	2599	25345	6831	53210	91320	57120	2937	6748	21129	6323	2435	2957	244300	95150	86710	11210	26940	14180	1921
Com_908_pos	Prim-O-glucosylcimifugin	C22H28O11	468.457	6.25	Carbohydrates And Its Derivatives	"80681-45-4"	86050	115400	57300	105200	52860	101600	128300	116500	142600	43070	64690	135600	84190	83430	122300	65810	62750	46330	143400	163600	173900	41370	69430	99290	32140	46420	33900	162600	152800	107400	64660	142200	70240	44930	87000	60510	142800	86090	152000	115100	105800	143600	39980
Com_909_pos	Oroxin A	C21H20O10	432.378	7.56	Flavonoids	"57396-78-8"	60370	70030	96280	35765	29646	33237	24980	50540	66080	55850	44180	72240	33750	57340	32010	23170	22270	46120	47853	40670	41140	29580	34330	48450	24150	18090	26020	40518	39476	33915	40610	69140	28570	42120	37360	31960	35434	36538	33571	48150	44200	18150	24800
Com_910_pos	Sattabacin	C13H18O2	206.28	6.12	Benzene and substituted derivatives	"169272-84-8"	59660	86310	73870	151900	78060	151500	66420	39000	59790	36100	47670	59400	34700	45400	33250	12580	19260	23780	106900	150000	169200	32890	59840	51200	21160	10360	14640	188200	168200	127300	40200	46150	60510	23150	18860	25450	153600	182100	162200	105500	91940	71120	30280
Com_911_pos	S-Methyl-L-cysteine	C4H9NO2S	135.185	1.04	Amino Acid And Derivatives	"1187-84-4"	888800	582200	1437000	48980	28420	33160	174600	54110	185700	151500	219000	191300	2327000	2135000	1133000	971100	808600	786700	444600	459900	1632000	1045000	324500	362400	757200	710300	687100	408900	320600	592100	380700	447100	747400	607700	767400	868500	435900	330300	214300	447700	671600	488800	1386000
Com_912_pos	Tomatidenol	C27H43NO2	413.636	12.27	Steroids and steroid derivatives	"546-40-7"	127900	115500	120000	139100	146000	106900	126800	127900	120500	140300	124700	108400	111700	168600	139100	84300	99090	132800	86400	141300	89050	126700	141300	118900	123400	107200	118700	156500	122800	148300	153700	107900	225100	97700	116200	95730	119100	135100	112400	137600	82820	115500	113600
Com_913_pos	C-hexosyl-apigenin O-hexosyl-O-pentoside			0.65	Flavonoids		382600	448800	391100	29530	19640	36950	392300	310300	490000	238000	315300	290200	116800	222100	170900	50270	42200	51220	129500	149800	153900	162400	168000	188200	21680	38330	14320	38470	49020	41800	180700	118800	124700	11110	23580	27140	23200	11840	21140	247500	259900	170700	47390
Com_914_pos	dCMP	C9H14N3O7P	307.197	1.06	Nucleotide And Its Derivates	"1032-65-1"	48960	9569	18800	17890	7913	17930	15390	23420	18800	7182	4836	12369	20780	11150	14380	8858	12190	6872	14940	23790	43330	13561	13920	14270	5783	7707	13790	16580	28670	17950	9814	10610	10010	6301	9916	10110	15470	13970	19070	10250	22300	21110	8550
Com_915_pos	8-Hydroxy-2-Deoxyguanosine	C10H13N5O5	283.241	0.96	Nucleotide And Its Derivates	"88847-89-6"	49420	52500	28630	41290	38920	35560	35900	49550	35050	19970	11260	30920	6196	11810	29200	21350	5668	12000	33940	48830	38100	6455	28120	15210	14970	10560	8015	28690	24900	8085	21910	22640	13060	11651	16764	17643	44610	22450	44140	28070	23750	16590	7566
Com_916_pos	2-Deoxy-D-galactose	C6H12O5	164.156	0.69	Carbohydrates And Its Derivatives	"1949-89-9"	1205000	1020000	1112000	625100	554700	885300	1204000	859100	634500	472000	731100	874600	892200	1047000	1193000	878200	815800	941300	968600	1078000	1215000	1207000	1136000	1241000	743000	674100	569100	750400	654600	533800	739100	621400	556500	381000	361100	358800	427800	397500	337100	608300	450500	407200	410800
Com_917_pos	1-Methylguanosine	C11H15N5O5	297.267	4.04	Nucleotide And Its Derivates	"2140-65-0"	149600	205400	120300	115300	81810	120900	118500	128300	153400	153700	150400	126300	174200	136200	112800	14340	21360	29070	259300	274400	273000	171600	187500	241700	48080	56350	50490	120100	107000	96700	123000	76220	116600	54950	42860	42640	80410	68600	72430	62570	104100	47680	104100
Com_918_pos	dAMP	C10H14N5O6P	331.222	1.47	Nucleotide And Its Derivates	"653-63-4"	546500	545300	443600	686900	393900	674400	479700	511800	512300	348000	525900	357100	65420	82090	84810	90830	63990	76030	251100	267200	245100	53800	96340	93870	71810	66250	48910	120200	108500	141600	80330	64640	50060	88990	89010	65130	141100	133100	177400	84610	62340	58940	24690
Com_919_pos	Fustin	C15H12O6	288.252	5.89	Flavanones	"20725-03-5"	105700	140000	28520	187400	144800	144900	65080	175200	127900	157300	175000	94280	51353	38534	8467	65809	23666	31372	6501	28328	30310	9369	25506	28256	79368	34394	105308	7666	124853	17748	28758	6999	20241	12600	29990	36046	22530	9584	11440	22010	8030	23830	25217
Com_920_pos	Typhaneoside	C34H42O20	770.685	6.32	Flavones and Flavonols	"104472-68-6"	13320000	15300000	6736000	31610000	30920000	33880000	6105000	50820000	34160000	99700000	78410000	70130000	22590	10590	147100	45538	4412	7507	32230	9162	3398	26330	51220	76300	2194	3965	22849	65410	116400	89870	322400	1083000	216400	6178	13900	6574	422800	244500	404100	1429000	931200	2159000	341300
Com_921_pos	Oleamide	C18H35NO	281.477	15.12	Fatty Acyls	"301-02-0"	32550000	15190000	48950000	69790000	46140000	66970000	41190000	46490000	48260000	43370000	39700000	46860000	52750000	48580000	41480000	38200000	48450000	50910000	76530000	63010000	54230000	53320000	54380000	45490000	42830000	36030000	39740000	89980000	90900000	78950000	41450000	44890000	41330000	45300000	46750000	56500000	72130000	81380000	85910000	43890000	48730000	50760000	51370000
Com_922_pos	p-Coumaroylagmatine	C14H20N4O2	276.334	12.15	Cinnamic acids and derivatives	"7295-86-5"	1586000	2176000	1315000	722800	758100	865900	728300	720500	854000	852200	744800	851500	1270000	1379000	1619000	899500	962900	1042000	2042000	2383000	2556000	1073000	1395000	1068000	922800	852400	782500	1140000	973800	1169000	1150000	855800	959000	862200	903500	952800	855300	990200	883100	862400	778500	719500	757500
Com_923_pos	Nicotianamine	C12H21N3O6	303.312	0.86	Amino Acid And Derivatives	"34441-14-0"	8635000	8464000	7690000	10830000	8173000	10730000	9694000	9695000	9929000	8339000	8994000	8584000	5058000	5432000	5432000	3109000	3439000	3405000	9958000	9091000	9108000	5325000	5600000	6033000	3520000	3154000	3008000	12100000	12390000	10650000	8089000	8944000	7951000	3405000	3732000	3140000	11810000	10300000	10080000	11730000	12580000	11130000	6487000
Com_924_pos	Nicotinate ribonucleoside	C11H13NO6	255.224	1.04	Carbohydrates And Its Derivatives	"17720-18-2"	190900	124300	269400	186000	139700	190900	234600	166700	255400	102000	189500	110500	377400	306300	274800	196800	202200	126600	505800	720800	606500	418900	231600	235600	230200	231000	198600	645100	615200	532500	912300	711700	1502000	331700	567100	521300	440100	704100	490900	889300	1136000	658800	625200
Com_925_pos	N-Feruloyltyramine	C18H19NO4	313.348	7.92	Phenols And Its Derivatives	"65646-26-6"	40760	55150	22020	370000	298300	529000	21140	84750	53280	152200	136900	129200	21160	27540	45383	147100	99640	146400	114100	69710	61180	5957	6708	4526	141700	173500	204000	140000	334300	189400	35780	88160	40920	94060	104800	85920	226600	405800	118100	29510	29720	32050	29280
Com_926_pos	NG,NG-Dimethyl-L-arginine	C8H20Cl2N4O2	202.254	0.93	Amino Acid And Derivatives	"220805-22-1"	140500	124400	130800	81130	52240	77370	43360	47760	59160	25460	35220	8240	192600	166500	148700	128800	162100	157900	326700	293500	215300	98080	100600	128100	126900	73330	119700	204600	240500	118200	86860	68310	59600	23570	43720	28310	157800	153600	110600	60140	102800	85520	19270
Com_927_pos	N-Coumaroyltyramine	C17H17NO3	283.322	7.73	Amino Acid And Derivatives	"36417-86-4"	45560	30780	15920	32090	24640	54360	44800	79340	83110	82830	98080	79450	13530	9292	10270	39470	16060	17250	127300	35320	14150	8337	7314	22370	15200	18790	45940	30960	52870	53440	41550	53740	12820	28080	22350	25660	51620	90210	33030	48560	48940	75760	49820
Com_928_pos	N-Feruloylserotonin	C20H20N2O4	352.384	12.14	Phenolamides	"68573-23-9"	999300	1267000	960000	325300	164500	292000	465500	284000	540200	252000	362100	481500	509900	554200	420400	132600	126000	93300	627500	705600	1108000	290800	622400	337000	59840	119400	76840	434000	276700	373900	334400	183900	119000	89290	153900	125100	225600	384500	253300	85540	258700	106400	88590
Com_929_pos	4-Nitrophenol	C6H5NO3	139.027	10.93	Phenols And Its Derivatives	"100-02-7"	13930000	12300000	12300000	13570000	11580000	10080000	14310000	14510000	16430000	13640000	9201000	8666000	7220000	6620000	5105000	5332000	4933000	4505000	4477000	5143000	4615000	4742000	5300000	6396000	7057000	7783000	7682000	7492000	9407000	10190000	10860000	10380000	9819000	11470000	11330000	12460000	13550000	11440000	12590000	12810000	13530000	12490000	12620000
Com_930_pos	trans-Aconitic acid	C6H6O6	174.016	10.95	Organic Acid And Its Derivatives	"4023-65-8"	5256000	4788000	5397000	4449000	4382000	4664000	4605000	4357000	3994000	3967000	4091000	4189000	4148000	3988000	4207000	4103000	4299000	4073000	3838000	4070000	4215000	4150000	3972000	4085000	4224000	4017000	3569000	3596000	3767000	4046000	3832000	3469000	3490000	3458000	3424000	3588000	3373000	3503000	3534000	3598000	3137000	3571000	3350000
Com_931_pos	Methylguanidine	C2H7N3	73.0971	0.84	Amines	"471-29-4"	182200	166700	181300	99780	73830	94400	60020	76540	57770	35620	22520	24450	90980	97760	98570	67370	70020	88960	110100	102300	118700	89890	85980	94090	73450	51380	65910	135200	139200	124300	62140	64600	60510	36970	22120	21730	105500	114400	108500	61200	73930	50650	19330
Com_932_pos	trans-2-Hexenal	C6H10O	98.14	11.005	Carbonyl compounds	"6728-26-3"	10850000	10660000	9797000	9075000	8628000	9543000	9429000	7155000	7900000	7243000	7175000	7825000	8002000	8175000	7579000	8819000	7899000	8886000	7863000	7877000	8552000	7762000	7573000	7939000	7407000	7619000	6531000	7570000	7428000	7952000	7227000	6813000	5667000	6925000	6132000	6022000	5666000	5813000	6455000	6137000	5784000	5206000	5785000
Com_933_pos	Scopoletin	C10H8O4	192.17	6.933	Coumarins and derivatives	"92-61-5"	91840	87380	60850	43260	38000	45790	183500	230100	223500	103900	169800	138300	53410	80110	28860	16930	37307	19660	82800	71090	57720	75550	61650	53310	44330	10810	35250	80200	77520	66760	142500	147200	129300	30240	58610	46990	104700	55570	78550	283400	287100	268300	86660
Com_934_pos	Muscone	C16H30O	238.41	15.95	Carbonyl compounds	"541-91-3"	143900	139900	152500	154300	159500	159900	142100	127700	119200	137700	151100	145400	147200	158200	161100	172400	169600	141800	160000	155800	161100	165600	136100	152300	170000	137100	131100	144500	168200	129700	146200	133300	128700	121500	133300	134700	125200	128400	119300	120000	125000	127200	119500
Com_935_pos	Harmine	C13H12N2O	212.25	6.587	Alkaloids and derivatives	"442-51-3"	19450	16040	14750	12800	21070	62090	27670	57230	36930	30950	18600	20003	12909	10942	11381	6879	8559	9306	9962	20842	16797	8176	9592	12690	12237	11242	11359	6276	6604	9725	13820	3594	13956	9887	10374	9413	8219	7988	5516	8547	5247	11680	11709
Com_936_pos	Neocnidilide	C12H18O2	194.274	11.74	Organoheterocyclic compounds	"4567-33-3"	41940	27162	33710	18250	20990	21110	26050	23090	42240	41830	36400	18770	28180	46250	28380	23120	30080	34320	20690	20050	32580	41270	41850	17880	18180	17150	21650	14030	19890	27100	41110	29050	40960	16670	28150	29060	19620	18560	24580	21020	18200	18720	24180
Com_937_pos	Neotuberostemonine	C22H33NO4	375.508	11.1	Alkaloids and derivatives	"143120-46-1"	17060000	11510000	10580000	7864000	35650000	11540000	7078000	13690000	10510000	12070000	25840000	7956000	12480000	24380000	20930000	8754000	11790000	13490000	13210000	14680000	8843000	13740000	13560000	27820000	14560000	8925000	9911000	12510000	8818000	11460000	10860000	14480000	40260000	13480000	12940000	13270000	10740000	17310000	11030000	12550000	12480000	10390000	12550000
Com_938_pos	Nerol	C10H18O	154.249	9.95	Terpenoids	"106-25-2"	162600	189100	170400	156000	174700	151700	140300	190200	148200	181300	179500	163900	182600	191200	150500	211900	172700	169600	166100	178400	165300	161900	184000	158400	188800	128300	152100	195900	162900	161100	144400	165700	150700	193300	158300	158100	165500	157000	158700	144600	153000	150400	176500
Com_939_pos	Sclareol Glycol	C16H30O2	254.413	7.54	Alcohols and polyols	"55881-96-4"	486000	387600	611000	30000	7324	24960	189500	245900	192700	94850	145300	148000	184900	176000	200600	34050	61670	68490	78420	62500	56600	178400	171300	149000	26500	72300	42900	33180	25350	19840	90740	127700	141500	23070	47860	43210	21500	14520	15930	120600	196700	115800	81680
Com_940_pos	D-Asparagine	C4H8N2O3	132.118	0.96	Amino Acid And Derivatives	"2058-58-4"	571200	682700	559700	595600	391100	478400	230500	244200	256100	197700	143400	181400	377900	419800	474000	329100	367100	389000	639700	698200	641400	327100	348300	368600	310200	273300	274400	464000	481300	505800	205600	270500	287100	159000	234900	159900	498500	589100	548300	282900	260000	270400	210700
Com_941_pos	Methyl Nicotinate	C7H7NO2	137.14	0.96	Pyridines and derivatives	"93-60-7"	14780	40110	16070	47850	31780	38530	25700	21430	30970	25610	16130	16610	13080	15510	14170	13910	23580	10930	35530	21100	34440	11420	16930	4500	10100	16820	16940	42570	47070	31970	13520	21120	27340	12700	7986	16190	42740	25940	35900	25150	38970	23800	9518
Com_942_pos	sn-Glycero-3-phosphocholine	C8H20NO6P	257.22	0.91	Glycerophospholipids	"28319-77-9"	28180000	35010000	18850000	4476000	2829000	4474000	6346000	6670000	6936000	3954000	4309000	3918000	16710000	23800000	29090000	11040000	9360000	9873000	22850000	27720000	28070000	12050000	11570000	11260000	7813000	6685000	5985000	5046000	4549000	4050000	5256000	5793000	5218000	3024000	3772000	3025000	3197000	2831000	2384000	5293000	5231000	4839000	2274000
Com_943_pos	Nardosinone	C15H22O3	250.333	11.12	Terpenoids	"23720-80-1"	14640000	13220000	13170000	12220000	12560000	12510000	13480000	12560000	11400000	11060000	10430000	11800000	11560000	11800000	11790000	11420000	11500000	10720000	10230000	10770000	11580000	10500000	11090000	11440000	11000000	10800000	9896000	10660000	9754000	10410000	10840000	9716000	10050000	10270000	10300000	10480000	10600000	8980000	9444000	10680000	9908000	10650000	9588000
Com_944_pos	6-hydroxy-7,8-dimethoxycoumarin	C11H10O5	222.197	10.21	Coumarins and derivatives		2303000	1949000	1854000	1777000	2222000	2126000	2094000	1693000	1428000	1687000	1889000	2106000	2568000	2758000	2818000	2828000	3094000	2928000	2974000	2708000	2484000	2190000	2255000	2353000	1985000	1948000	1688000	1843000	1589000	1613000	1546000	1357000	1471000	1574000	1502000	1303000	1422000	1172000	1144000	1155000	1176000	1129000	1079000
Com_945_pos	D-Myo-inositol 4-monophosohate	C6H13O9P	260.136	0.92	Organic Acid And Its Derivatives	"46495-39-0"	6788000	7434000	7029000	1647000	954500	1668000	3176000	2417000	3014000	1337000	1621000	1615000	8153000	6800000	8417000	3944000	3603000	4553000	8206000	9244000	11170000	6948000	5508000	6027000	3458000	2165000	2814000	2789000	3047000	2825000	2786000	3602000	2909000	1436000	1821000	1155000	2001000	1871000	1757000	3277000	3216000	2505000	1335000
Com_946_pos	UDP-N-acetylglucosamine	C17H27N3O17P2	607.354	0.99	Nucleotide And Its Derivates	"528-04-1"	62300	96920	79820	34060	41880	37050	37740	28510	55140	23430	56440	24370	37390	40140	52820	30521	28878	11290	59270	45340	87040	46350	47590	49930	18390	22480	31506	33760	21800	12220	45310	51640	37310	17420	27828	15350	33640	27240	44430	48830	37830	31860	42480
Com_947_pos	Lysopc 17:0	C25H52NO7P	509.657	13.17	Phospholipid	"50930-23-9"	33150	36430	72150	35930	18990	32320	45080	33000	51170	29810	31660	37720	41810	50660	29990	39990	15770	32170	86420	100900	98160	36340	21650	37950	22160	33620	35510	83250	101700	60860	39260	49310	55980	35790	45700	45550	66280	54780	73490	24560	55280	28850	30120
Com_948_pos	Lysopc 14:0	C22H46NO7P	467.577	11.37	Phospholipid	"20559-16-4"	51120	67520	72960	12210	8298	7597	15640	12910	22310	12670	9796	8562	38410	56060	25870	15180	14510	26880	85270	80650	89440	27310	22980	30870	11530	28150	22970	37100	38410	32390	21830	35570	28920	17340	25490	31940	35230	27690	35930	29080	21650	20310	13280
Com_949_pos	Lysine	C6H14N2O2	146.188	0.85	Amino Acid And Derivatives	"70-54-2"	245600000	237700000	249700000	52650000	40480000	50160000	65900000	70910000	64860000	29810000	29020000	29400000	177900000	179600000	177400000	157500000	159700000	168200000	92970000	103600000	85910000	126500000	127100000	142600000	128300000	114900000	109100000	81410000	78340000	76230000	73010000	80910000	68400000	23870000	23510000	20540000	84870000	84280000	82020000	100500000	105000000	103500000	38900000
Com_950_pos	Rhodomyrtone	C26H34O6	442.54	11.33	Organoheterocyclic compounds		1380000	851700	1608000	2124000	959700	1736000	2180000	1633000	1359000	1733000	1595000	1893000	1869000	1904000	1960000	1661000	2507000	2119000	1723000	1771000	2086000	1842000	2021000	2101000	1792000	2116000	2181000	1738000	1951000	1984000	2316000	1684000	2079000	1706000	2490000	2072000	2238000	2220000	2002000	1833000	2437000	2035000	2100000
Com_951_pos	Selgin C-hexoside	C22H22O12	478.4	0.74	Flavonoids		18900	31700	23860	76860	55450	85320	36760	42320	38680	40740	59560	55050	66140	31210	27490	77970	48000	84560	27200	38110	35250	30920	40670	57540	63420	41410	65730	71050	94730	91920	62820	34340	42090	32840	37290	28540	70670	75860	72720	79250	46610	53200	51520
Com_952_pos	Selgin 5-O-hexoside	C22H22O12	478.4	0.94	Flavonoids		241900	355100	100800	412100	522000	510000	217600	533500	482300	341300	248600	247900	98930	89190	82670	129500	101000	116000	264100	307700	259500	78530	38250	78310	77240	82160	69640	193100	414800	433000	48810	29640	71540	38860	55580	63280	348300	705400	576400	83540	51490	60150	72550
Com_953_pos	methylQuercetin O-hexoside			0.98	Flavonoids		146700	210700	134400	306900	182000	367200	151600	374300	255000	242900	172500	182300	100200	75430	133800	102900	77490	100400	180100	235400	207200	50910	41800	69360	64890	100700	82460	184900	334600	346100	69330	82470	64080	53060	92030	40970	567500	533200	507500	101200	85070	93660	78560
Com_954_pos	Methyl oleate	C19H36O2	296.488	1.06	Fatty Acyls	"112-62-9"	102800	43610	161210	177100	259000	228400	136400	160300	104700	186700	247700	219000	173500	115200	153300	157400	194100	141500	201000	267300	146700	170700	176100	223900	107300	131400	144000	224100	216600	216200	145400	108900	162500	124400	149500	161200	156100	197000	184200	80990	191100	124200	172400
Com_955_pos	methylChrysoeriol 5-O-hexoside	C23H24O11	476.43	0.97	Flavonoids		23050	30650	32360	47800	19120	27600	39200	25500	28450	10490	13889	15340	9032	19790	9326	19840	9602	17950	72870	25320	73840	14940	14820	16380	11910	13390	11610	51330	48670	41940	9548	15420	11790	5577	10500	5283	84940	75040	90790	27610	20330	31110	7537
Com_956_pos	Methyl Benzoate	C8H8O2	136.148	1.84	Benzoic acids and derivatives	"93-58-3"	195700	201300	203100	9247	24220	19284	30412	19040	38343	65240	6806	32236	48510	88460	117900	26060	32970	82410	18500	29340	17750	42330	73480	54100	28210	27150	54160	7380	29110	14510	19110	11520	45930	24288	8219	6364	18140	10310	14860	4857	15200	20750	9684
Com_957_pos	methylNaringenin C-pentoside	C21H22O9	418.394	0.72	Flavonoids		635000	580700	475800	427900	198900	473000	788100	591600	559500	556800	519400	860100	494500	683700	695800	449200	362300	552800	554800	507300	620400	549900	700800	615700	604800	374400	269000	525500	513200	490900	519500	587400	389300	116900	311200	201400	366900	126600	326200	643300	823800	390700	288100
Com_958_pos	2-Methoxyhexadecanoate	C17H34O2	270.451	0.97	Fatty Acyls	"112-39-0"	1250000	1558000	1595000	1764000	1341000	2014000	1316000	2154000	1485000	1021000	1549000	1397000	1164000	2248000	3511000	3279000	1754000	1491000	2579000	2363000	2003000	2000000	1359000	2170000	3400000	2852000	1529000	1936000	2228000	1901000	1422000	1552000	989900	828000	861500	1264000	2168000	2342000	2343000	1211000	1615000	1530000	1011000
Com_959_pos	Methyl heptadecanoate	C18H36O2	284.477	15.09	Fatty Acyls	"1731-92-6"	1559	1948	4177	5863	3877	4278	3796	4330	2601	3796	3671	4243	4654	3677	3195	3107	2724	3448	6677	4403	4412	4580	3758	3445	3080	2773	4118	5731	5716	6236	3165	2849	3713	2525	3422	3922	5934	7247	6503	3189	3161	2322	4128
Com_960_pos	Carnosol	C20H26O4	330.418	12.05	Phenols And Its Derivatives	"5957-80-2"	42500	31130	47720	3504	8212	13681	4885	5384	3372	10530	12361	17896	56680	54970	72330	27790	24300	18410	31490	27190	33540	33400	38320	34480	18070	7923	21260	18331	5589	11070	11930	14340	14760	7271	9989	15650	9340	7487	4803	9716	19550	2025	7635
Com_961_pos	D-(+)-Octopine	C9H18N4O4	246.264	0.73	Amino Acid And Derivatives	"34522-32-2"	17580	33540	28700	22760	12810	20497	15080	17550	23620	26060	14230	17500	17920	30510	9080	17450	11920	12360	14040	27710	19150	12180	25270	21830	21940	24930	31050	16740	15420	19230	21410	27390	41880	16570	20180	22050	16880	15970	17980	14740	16150	17970	22690
Com_962_pos	Cyanidin O-rutinoside	C27H31O15	595.52	6.66	Anthocyanins		158300	142300	87390	3141000	1821000	3517000	562400	977800	455600	349800	402000	276400	61337	14700	6373	51814	9822	18616	9782	5773	7352	5394	29974	23117	56936	23264	75409	46950	47170	56760	23920	69130	3576	28031	23201	25844	112200	235800	142100	21730	21360	23320	18958
Com_963_pos	Obacunone	C26H30O7	454.51	10.997	Terpenoids	"751-03-1"	198100	287300	117000	16403	17577	17175	9235	3066	6565	2236	3053	16441	56900	69830	78080	4168	3296	4633	19390	20520	29680	30110	37110	29460	20293	6613	4967	25089	4297	2148	8690	11890	27698	18630	21783	17682	25356	3755	28654	8230	8111	5880	26507
Com_964_pos	Sophoricoside	C21H20O10	432.38	7.038	Isoflavonoids	"152-95-4"	362300	301900	308100	32160	17666	10080	84820	95190	77920	95020	109500	97650	121900	146800	138700	112700	67330	93980	88070	83580	140300	99670	114700	152900	113300	95720	71170	28030	36390	34630	82110	64270	76740	81470	63110	53810	20250	30220	21790	81340	64630	59850	36830
Com_965_pos	1-Methyladenine	C6H7N5	149.153	1.05	Purines and purine derivatives	"5142-22-3"	313000	364800	159400	379400	289000	321100	517500	530900	603200	321800	331200	330500	122500	114700	107400	52350	44540	82890	834100	902200	915200	227500	180700	181400	67480	71490	74380	484200	549200	486300	256000	270600	250000	88640	104000	111900	509300	525800	479300	352200	286200	274400	199900
Com_966_pos	1-Linoleoyl-Rac-Glycerol	C21H38O4	354.524	12.05	Fatty Acyls	"2277-28-3"	553700	781100	540300	190700	58600	147200	263800	203700	275200	128700	219100	286900	384500	274800	228000	73230	61090	52030	386100	382700	704600	154900	295500	208000	50870	68010	30840	201800	162800	191900	220500	115200	62370	62870	81370	68560	115100	201900	122500	59350	126900	51960	52890
Com_967_pos	1-Decanoyl-2-hydroxy-sn-glycero-3-phosphocholine			6.35	Cholines		721900	368800	321500	35080	21610	63570	216200	172500	132800	134400	325500	106100	351000	415600	633900	236200	217700	337900	225500	365300	190000	237400	386300	209000	269400	130300	370600	149400	121000	93580	297200	272500	154700	72910	159800	122600	69380	77630	51620	265200	123700	218900	22360
Com_968_pos	Leucine	C6H13NO2	131.175	2.1	Amino Acid And Derivatives	"26782-71-8"	11780000	10960000	11390000	730100	433000	750800	697800	783700	715000	331100	370800	291300	5127000	5010000	5011000	3611000	3599000	4048000	1920000	2370000	2052000	3253000	3336000	4080000	3047000	2029000	2176000	1728000	2097000	1529000	1042000	1010000	948600	294500	337800	250900	1519000	1496000	1336000	1295000	1336000	1148000	345700
Com_969_pos	vasicine	C11H12N2O	188.229	4.86	Alkaloids and derivatives	"6159-55-3"	1261000	1286000	1183000	31040	20820	37480	141500	147300	145500	37850	36340	31950	220500	223700	219500	271400	277200	342700	62690	85530	93240	225600	264500	301300	309100	266900	278200	37660	122100	40420	59150	55340	46920	41930	58640	37720	36560	41570	39560	51280	67480	35600	17710
Com_970_pos	Ferruginol	C20H30O	286.452	12.355	Terpenoids	"514-62-5"	137500	177900	208500	107500	46900	131500	152400	127100	135900	92680	151200	106300	132200	164400	114100	36500	39250	44220	161800	152900	198000	86200	117300	93460	24120	31530	29130	89000	74810	62690	95220	58430	31650	28980	38050	30650	42920	63930	45300	30080	49190	22020	20300
Com_971_pos	1-Aminocyclopropanecarboxylic acid	C4H7NO2	101.1	0.894	Phytohormones	"22059-21-8"	2010000	1802000	2005000	1512000	928700	1559000	683400	790500	851600	430700	492600	392700	1178000	1179000	1262000	838600	901800	971200	1313000	1418000	1227000	979000	1027000	1110000	862600	674500	750500	1542000	1610000	1439000	778800	830500	618800	289400	324200	294900	1201000	1362000	1157000	757900	825500	681300	352000
Com_972_pos	S-Adenosyl-L-homocysteine	C14H20N6O5S	384.411	1.84	Amino Acid And Derivatives	"979-92-0"	27920	20330	26640	62380	35210	66100	12720	23340	29030	13780	6251	8182	14750	7828	4014	6146	4151	6056	13650	32170	22380	7483	9635	11100	6450	5323	6636	44510	30350	32900	5849	10960	10910	3621	5231	5392	17750	26100	21590	12030	8969	7003	6507
Com_973_pos	Homocysteine	C4H9NO2S	135.185	0.84	Amino Acid And Derivatives	"454-29-5"	64810	48440	51720	210000	129100	197300	85340	77690	95850	73670	83060	75930	42000	58180	46920	51710	52670	55010	121900	87720	100500	42310	48630	31890	39280	50170	48120	182400	202900	179900	85420	75190	81010	64530	46880	74860	156700	195100	172800	67560	82450	54110	57160
Com_974_pos	L-Methionine	C5H11NO2S	149.212	1.38	Amino Acid And Derivatives	"63-68-3"	2952000	2540000	2194000	534800	282200	566400	426600	259600	329000	129600	216700	195400	800800	1278000	1369000	567300	558700	511600	725300	617900	891100	706200	738500	883900	638800	301000	337600	644900	591000	706500	605400	613800	563700	132600	109400	95620	422900	361300	738000	771600	721100	605600	211500
Com_975_pos	Alpha-Linolenic acid	C18H30O2	278.435	12.64	Fatty Acyls	"463-40-1"	35020000	61640000	19260000	203700	76370	164400	367900	221800	509500	208100	448700	330100	14460000	18730000	23160000	3301000	2022000	1883000	9334000	15720000	20910000	2989000	4111000	2151000	1426000	1551000	1524000	2549000	1410000	2434000	1633000	728500	817000	673600	999500	900200	626800	1275000	457100	567100	1155000	486400	479600
Com_976_pos	Spermidine derivative	C8H21N3O6	255.27	14.85	Amines		44570	33600	82940	66370	39660	71830	35210	38370	35390	30150	38220	37120	47500	46390	38600	36250	42990	41390	72180	71580	70830	47280	49970	45210	32170	25800	36990	82720	88580	82660	29760	40080	34930	29630	35970	43200	50230	74180	71720	35310	34350	41780	42110
Com_977_pos	Selgin C-hexoside derivative			0.87	Flavonoids		48860	30130	34240	110700	49170	95780	46890	46050	29400	30280	63450	72480	43150	68120	29850	44660	86510	68730	38620	34290	59710	55010	38270	49500	69460	56910	64830	71940	99450	83420	60130	51560	47540	26100	37320	51340	105100	91860	75480	100000	80830	82420	68000
Com_978_pos	methylApigenin C-hexoside	C22H22O10	446.404	0.73	Flavonoids		167700	140500	173100	225300	81250	273200	170100	148300	176100	192200	289400	258800	204400	167000	261600	120800	91500	255600	136500	181400	160200	138200	167200	155200	138600	74690	103500	124800	94770	165000	250000	174800	149700	58730	114400	97210	126000	132800	58680	186700	206100	243000	147200
Com_979_pos	methylApigenin C-pentoside	C21H20O9	416.378	1.01	Flavonoids		39680	30280	25580	123000	141500	131600	162900	138000	141700	168700	171000	120800	56160	26040	32060	35330	35210	31450	112800	97960	104800	66830	71980	61300	26800	30040	35280	82190	96880	70960	61420	90260	105700	76820	55050	63320	63180	50280	76080	51380	76920	60850	52680
Com_980_pos	LPC(1-acyl 18:3)	C26H48NO7P	517.63	12.59	Phospholipid		829700	859200	1954000	487700	233100	429500	439700	304900	389900	298200	363800	350600	697700	781200	560500	516200	393900	424000	1654000	1823000	1934000	521500	418700	605300	379000	332900	485500	1386000	1539000	1140000	528500	595800	496600	428100	489900	561900	1215000	1128000	1353000	375700	659200	507900	551500
Com_981_pos	Oroxin B	C27H30O15	594.518	6.982	Flavonoids	"114482-86-9"	133800	164200	184600	22470	30524	26260	47720	67360	64560	52720	80100	65060	73820	96540	69150	85300	73000	103100	65880	96700	68380	85950	68340	79960	64940	53490	67840	31320	33140	38690	40530	62520	40110	54150	73850	56120	21450	9798	17670	47630	71640	71150	36220
Com_982_pos	di-C,C-pentosyl-luteolin	C25H26O14	550.46	0.73	Flavonoids		445100	368000	427000	134800	57070	143400	426200	408500	433900	289400	357000	295600	204600	283700	124400	78330	72450	85740	227400	312800	176700	222900	181400	235100	97770	74030	97130	204500	64260	140300	187400	251700	203700	72140	81400	26080	101200	102900	67020	341300	324300	272100	61180
Com_983_pos	Denin	C33H56O14	676.79	11.46	Steroids and steroid derivatives		19230	49960	21860	29770	5406	38720	6995	1294	13830	4235	21170	7273	16180	26980	20610	11440	3181	3047	166500	121900	312200	16820	30790	8020	3995	5628	1506	181900	345500	282300	46220	30720	36180	10250	19620	3294	531900	418600	461100	24860	56120	45240	11770
Com_984_pos	di-C,C-hexosyl-apigenin	C27H30O15	594.518	5.82	Flavonoids		18530	26470	19310	20650	7021	15940	14120	12630	19690	2653	6686	13817	14710	16850	29350	9927	7645	5324	84900	68150	80050	12180	15270	11040	16630	4910	8729	37610	54170	36420	6438	6054	6414	10261	6807	1812	16960	6453	7216	21510	11340	13320	4964
Com_985_pos	LysoPC 20:2 (2n isomer)	C28H54NO7P	547.36	13.26	Phospholipid		24320	45690	44640	17410	6720	12910	20430	18660	26540	12400	17410	21870	55220	62360	46340	19920	23100	24020	49610	46490	46340	32320	26480	26140	10270	17070	15550	23940	28550	20620	17490	25390	23090	14050	18670	23610	17420	23270	15940	13240	27600	17730	11420
Com_986_pos	(-)-N-[3',4'-Dihydroxy-(E)-cinnamoyl]-L-glutamic acid	C14H15N1O7	309.271	16.07	Amino Acid And Derivatives	"860295-23-4"	193900	110100	265400	414200	300900	376200	174900	215700	244700	164500	184400	193600	264800	161100	190300	175000	281600	203000	413500	381100	314700	228200	185300	157900	176900	175700	202900	501900	559600	474700	213700	168600	134400	180700	193500	281500	325900	424000	480100	208400	229600	238000	192200
Com_987_pos	(-)-Norepinephrine N-hexoside	C14H21NO8	331.32	1.05	Glycosides		319300	232100	264300	1026000	730300	1098000	1036000	1103000	1330000	831000	1108000	931200	214900	163100	192800	193500	164200	259600	415200	517400	477900	177600	123200	147800	190400	177400	188300	305500	328700	398100	140900	150200	135400	203000	178600	121800	253500	257600	221500	171000	180200	204700	142000
Com_988_pos	Maltitol	C12H24O11	344.31	0.914	Fatty Acyls	"585-88-6"	26260	27460	35640	26290	19740	26430	59520	44790	43050	26550	27710	21830	22240	22934	31660	23310	17840	23850	38190	46090	23400	26560	26840	24290	16820	33410	21620	35980	39710	26070	11520	27640	22297	18698	22790	9538	40490	30570	34380	37060	42030	34670	18880
Com_989_pos	Przewaquinone A	C19H18O4	310.344	11.752	Quinones	"76843-23-7"	1776000	2383000	1500000	239917	183691	248871	201500	43090	98670	59460	107500	108400	1600000	2282000	2443000	613500	399500	380400	698000	1413000	1474000	1060000	890600	511400	444900	334500	389100	345700	487200	216900	398300	341800	345300	172700	279300	251500	226200	238200	189900	290800	400100	291200	296800
Com_990_pos	Levodopa	C9H11NO4	197.19	1.019	Amino Acid And Derivatives	"59-92-7"	109600	95810	140600	100800	112800	124800	151600	134200	85380	83310	99610	144200	99170	101600	112200	286800	268600	320400	87190	69080	97580	114700	93430	55950	198300	161000	139800	87830	85330	80900	152800	84300	92860	93140	81020	73030	97290	65440	76000	103700	90900	87230	83820
Com_991_pos	L-Phenylalanine	C9H11NO2	165.19	4.108	Amino Acid And Derivatives	"63-91-2"	157600000	139900000	156400000	29340000	16770000	30140000	21270000	22570000	22500000	9742000	12720000	10900000	140100000	133500000	130900000	96420000	97240000	106000000	53740000	64740000	57300000	77120000	82140000	100100000	83070000	48990000	62300000	71820000	89120000	61190000	30040000	30770000	29310000	11340000	13340000	11710000	60150000	63090000	55010000	38980000	43380000	37120000	14760000
Com_992_pos	Nobiletin	C21H22O8	402.39	10.518	Flavones and Flavonols	"478-01-3"	8869	18230	13000	13550	18100	15470	15320	10490	9631	9668	12810	13510	30150	16820	27120	16920	20460	13360	21950	26500	10550	15140	19610	18440	34140	22910	20980	14190	27720	20100	17870	26080	20090	25080	17900	26580	15330	27260	24460	19740	21630	30370	18000
Com_993_pos	Tangeretin	C20H20O7	372.37	11.41	Flavones and Flavonols	"481-53-8"	16820	8823	12030	16760	20370	15910	13690	23480	24530	12220	17160	10940	26330	27100	31290	17860	20270	21060	25950	23510	16700	15900	20700	15730	30900	19490	31580	33250	27050	22870	22820	26120	23280	25010	29480	37040	19650	26730	26970	23030	22590	16950	18670
Com_994_pos	D-Pyroglutamic acid	C5H7NO3	129.114	1.62	Amino Acid And Derivatives	"4042-36-8"	12320000	10410000	11770000	1037000	799300	1112000	2174000	1474000	1547000	1212000	1485000	994200	13190000	4800000	4624000	11410000	3776000	4911000	1803000	1944000	1623000	3146000	2880000	4027000	8057000	3371000	11230000	2003000	25700000	1699000	3483000	1809000	1661000	1743000	1848000	2476000	1584000	1685000	1474000	2262000	2327000	2078000	1434000
Com_995_pos	2-(Dimethylamino)Guanosine	C12H17N5O5	311.294	4.57	Nucleotide And Its Derivates	"2140-67-2"	550300	645000	609300	484100	299100	513400	658000	649000	683500	758000	612600	682400	352700	283600	312000	359800	357700	456600	646000	800600	921900	602600	619600	535300	535600	431900	413200	457800	441700	431100	404400	371700	465600	407100	537700	356400	378500	363700	335600	290100	372600	301300	337300
Com_996_pos	1-Methylnicotinamide	C7H9N2O+	137.159	2.68	Pyridines and derivatives	"3106-60-3"	55200	38140	52920	61910	23230	66880	66120	43490	59040	27450	35410	28270	99140	43510	42578	8612	38528	15590	160600	62710	73160	29980	23980	27120	94110	17870	14270	73170	98950	68930	41860	30540	58920	17610	15740	25500	44790	58790	53730	65150	70620	50280	24900
Com_997_pos	5-Hydroxylysine	C6H15ClN2O3	198.65	0.72	Amino Acid And Derivatives	"13204-98-3"	42870	23610	44110	30640	7811	26610	53870	23210	36220	5142	15463	13590	20320	16270	14630	17687	6677	8228	39090	31110	45680	15910	8722	19490	22150	12185	10390	24540	25650	26380	14440	11430	16800	6835	18473	17251	33510	39640	50220	13320	16950	7532	7369
Com_998_pos	5-Methoxyindoleacetic acid	C11H11NO3	205.21	4.87	Indoles and derivatives	"3471-31-6"	984600	985200	882200	24430	25900	29160	102700	145600	100600	36510	41180	40770	236700	206100	189100	254600	216600	292500	47170	72240	59690	180000	204600	257300	271000	236100	238700	33280	85630	36130	42160	50300	46960	42090	64810	32060	37540	35410	38970	43560	50420	48940	18560
Com_999_pos	Indole	C8H7N	117.148	4.87	Indoles and derivatives	"120-72-9"	1492000	1663000	1482000	48120	33060	52580	160900	202300	178300	61810	45200	51500	306000	272500	288700	356600	327000	428300	76960	90630	84910	240500	304800	338200	351300	318300	299300	40800	138900	54470	72340	63570	50270	61650	80380	44140	44250	54920	50610	56950	73190	57230	12700
[truncated: 13 more columns]
